# Supplementary material for: Immunotherapy of glioblastoma explants induces interferon-γ responses and spatial immune cell rearrangements in tumor center, but not periphery
Source: PubMed Central journal article supplement — Sci Adv. 2022 Jul 1;8(26):eabn9440. doi: 10.1126/sciadv.abn9440 (PMC10883360; doi:10.1126/sciadv.abn9440), 2022-07-01
Supplement: sciadv.abn9440_sm.pdf [file sciadv.abn9440_sm.pdf]

Supplementary Materials for  
**Immunotherapy of glioblastoma explants induces interferon- $\gamma$  responses and spatial immune cell rearrangements in tumor center, but not periphery**

Tala Shekarian *et al.*

Corresponding author: Christian M. Schürch, christian.schuerch@med.uni-tuebingen.de;  
Gregor Hutter, gregor.hutter@usb.ch

*Sci. Adv.* **8**, eabn9440 (2022)  
DOI: 10.1126/sciadv.abn9440

**The PDF file includes:**

Figs. S1 to S12  
Table S1  
Legend for data S1

**Other Supplementary Material for this manuscript includes the following:**

Data S1



**Fig. S1. Biopsy Locations.**

Biopsies were acquired using the intraoperative navigation system Brainlab Automatic Image Registration (Brainlab). Preoperative planning of surgeries and labeling of important eloquent structures was performed in all cases, based on diffusion tensor imaging (DTI) or anatomical considerations. Intraoperative screen captures of both contrast enhancing center and peripheral invasion zone were acquired to document accuracy of the biopsy location. Intraoperative 5-ALA fluorescence was used as an additional stratifier for center-periphery discrimination (5-ALA fluorescence high for vital, contrast enhancing tumor vs. 5-ALA fluorescence low for infiltration zone).

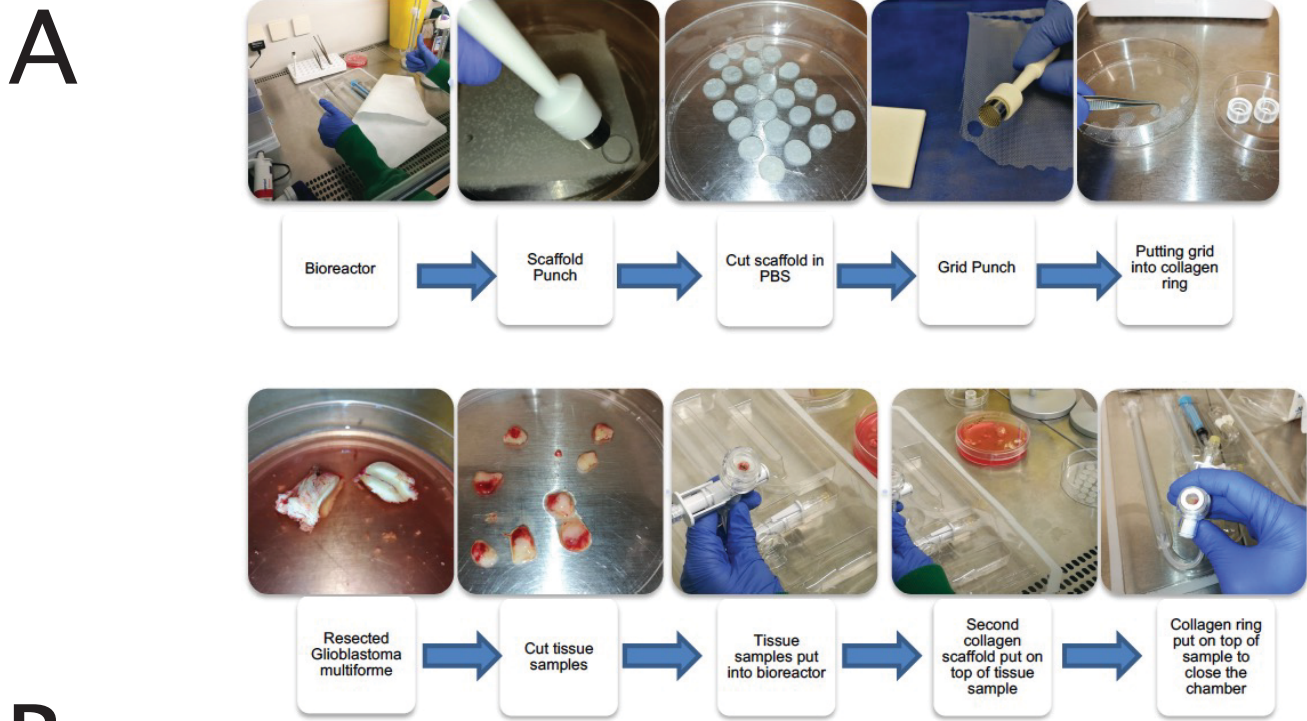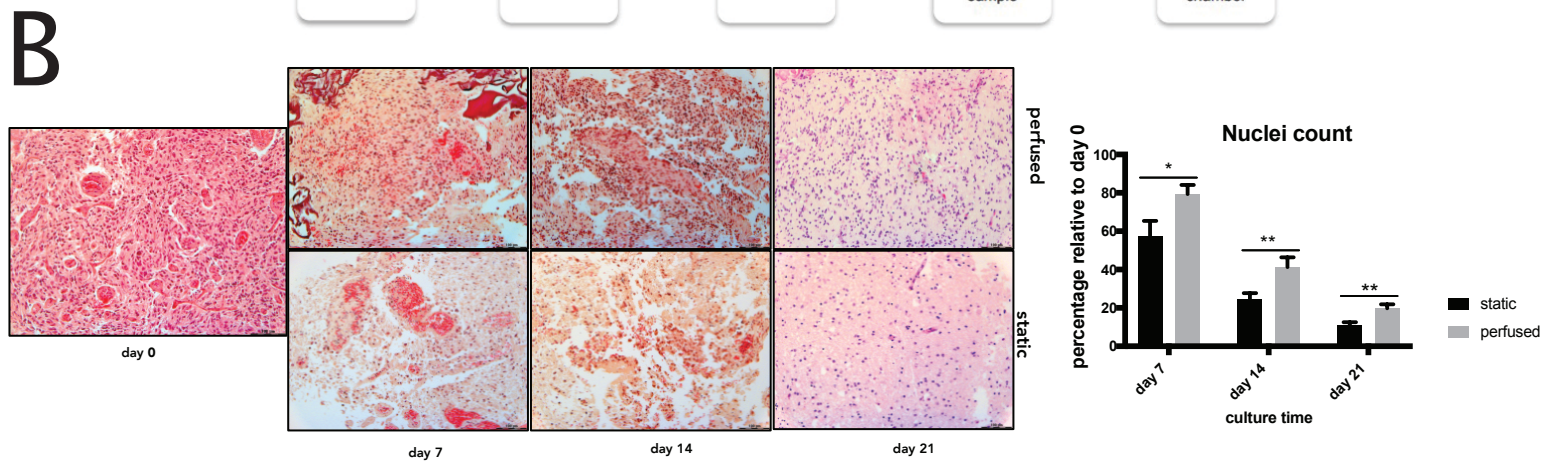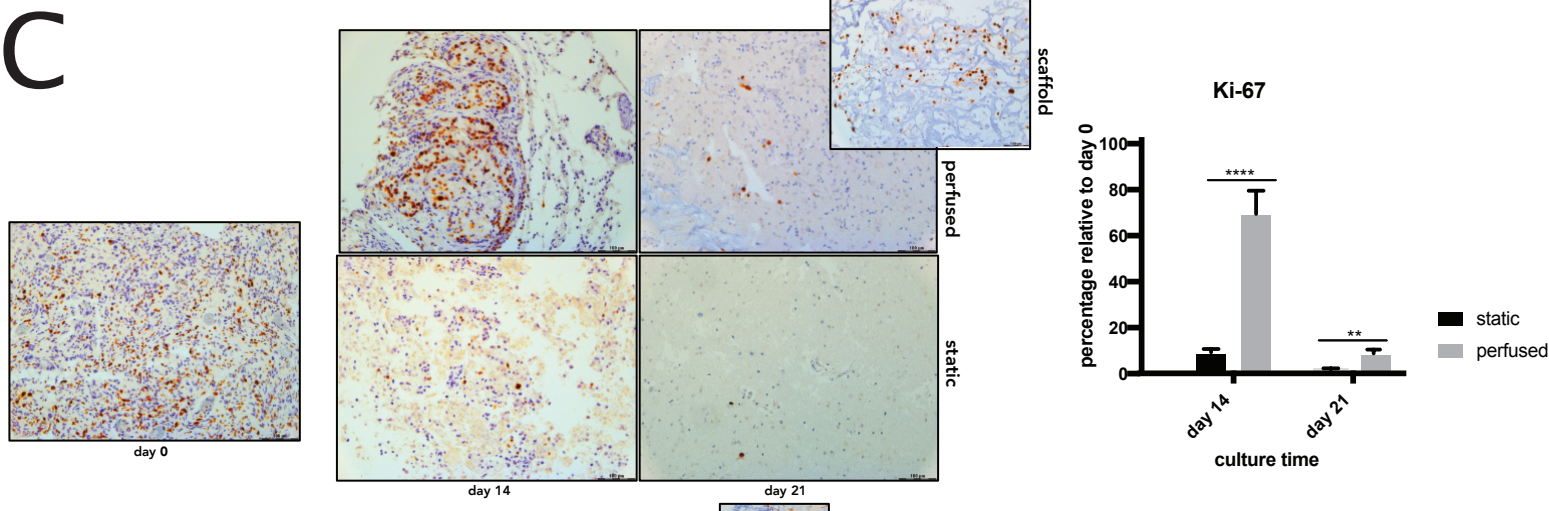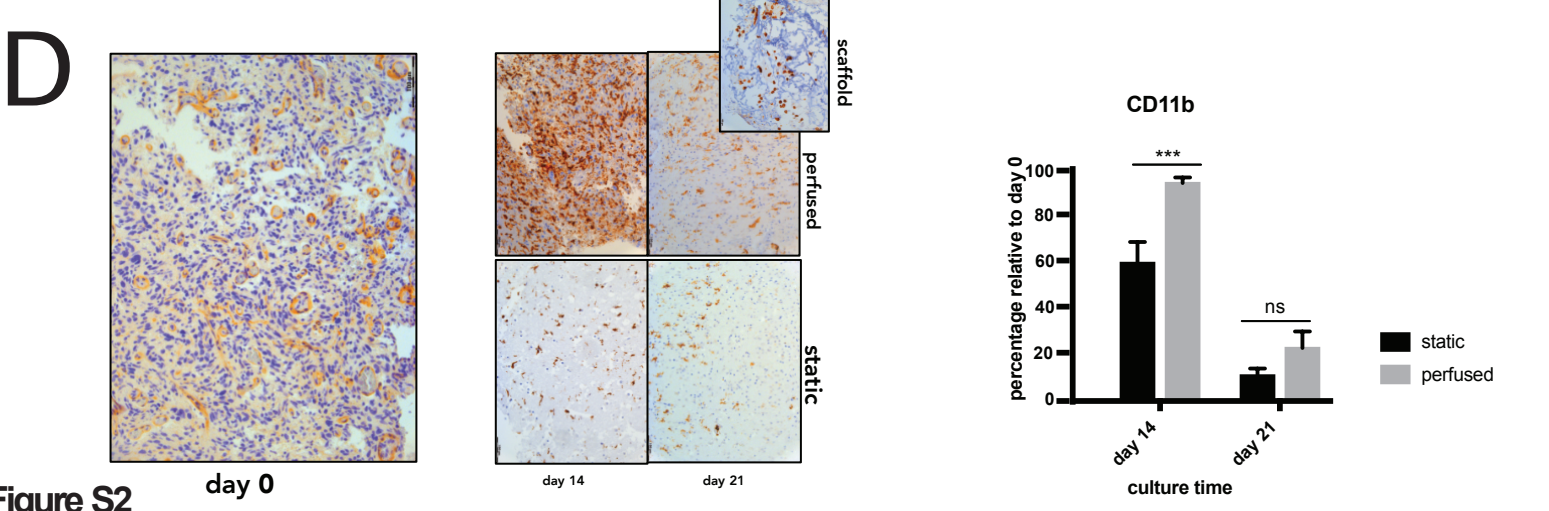

Figure S2

**Fig. S2. Bioreactor setup and validation.**

**(A)** Workflow of assembling bioreactor 3D perfusion culture directly after tumor resection. **(B)** *Left:* Representative H&E stained microphotographs of individual tumor samples (center biopsy) at day 0, and after 7, 14 and 21 days of either perfusion culture or static culture condition (40x magnification). *Right:* Analysis of nuclear counts per 10 high power fields in 3 independent samples in relation to the D0 sample in perfused and static samples. **(C)** *Left:* Representative anti-Ki-67 immunohistochemical stained slides comparing static and perfused culture conditions at day 0, and 14 and days 21 after *ex vivo* culture. Insert: proliferating tumor cells invading the bioreactor scaffold after 21 days of *ex vivo* culture (40x magnification). *Right:* Relative quantification of Ki-67<sup>+</sup> proliferative cells after 14 and 21 days of *ex vivo* culture in static and perfused conditions, compared to freshly obtained GBM tissue (D0). **(D)** *Left:* Representative anti-CD11b immunohistochemical stained slides comparing static and perfused culture conditions at day 0, and 14 and days 21 after *ex vivo* culture. Insert: myeloid cells invading the bioreactor collagen scaffold after 21 days of *ex vivo* culture (40x magnification). *Right:* Relative quantification of CD11b<sup>+</sup> myeloid cells after 14 and 21 days of *ex vivo* culture in static and perfused conditions, compared to freshly obtained GBM tissue (D0). Data are obtained from 3 individual explants in each static and perfusion culture, and represented as mean +/- SEM.

*Statistics:* \*p<0.05, \*\*p<0.01, \*\*\*p<0.005, student's t-tests.

# Detailed clustering strategy

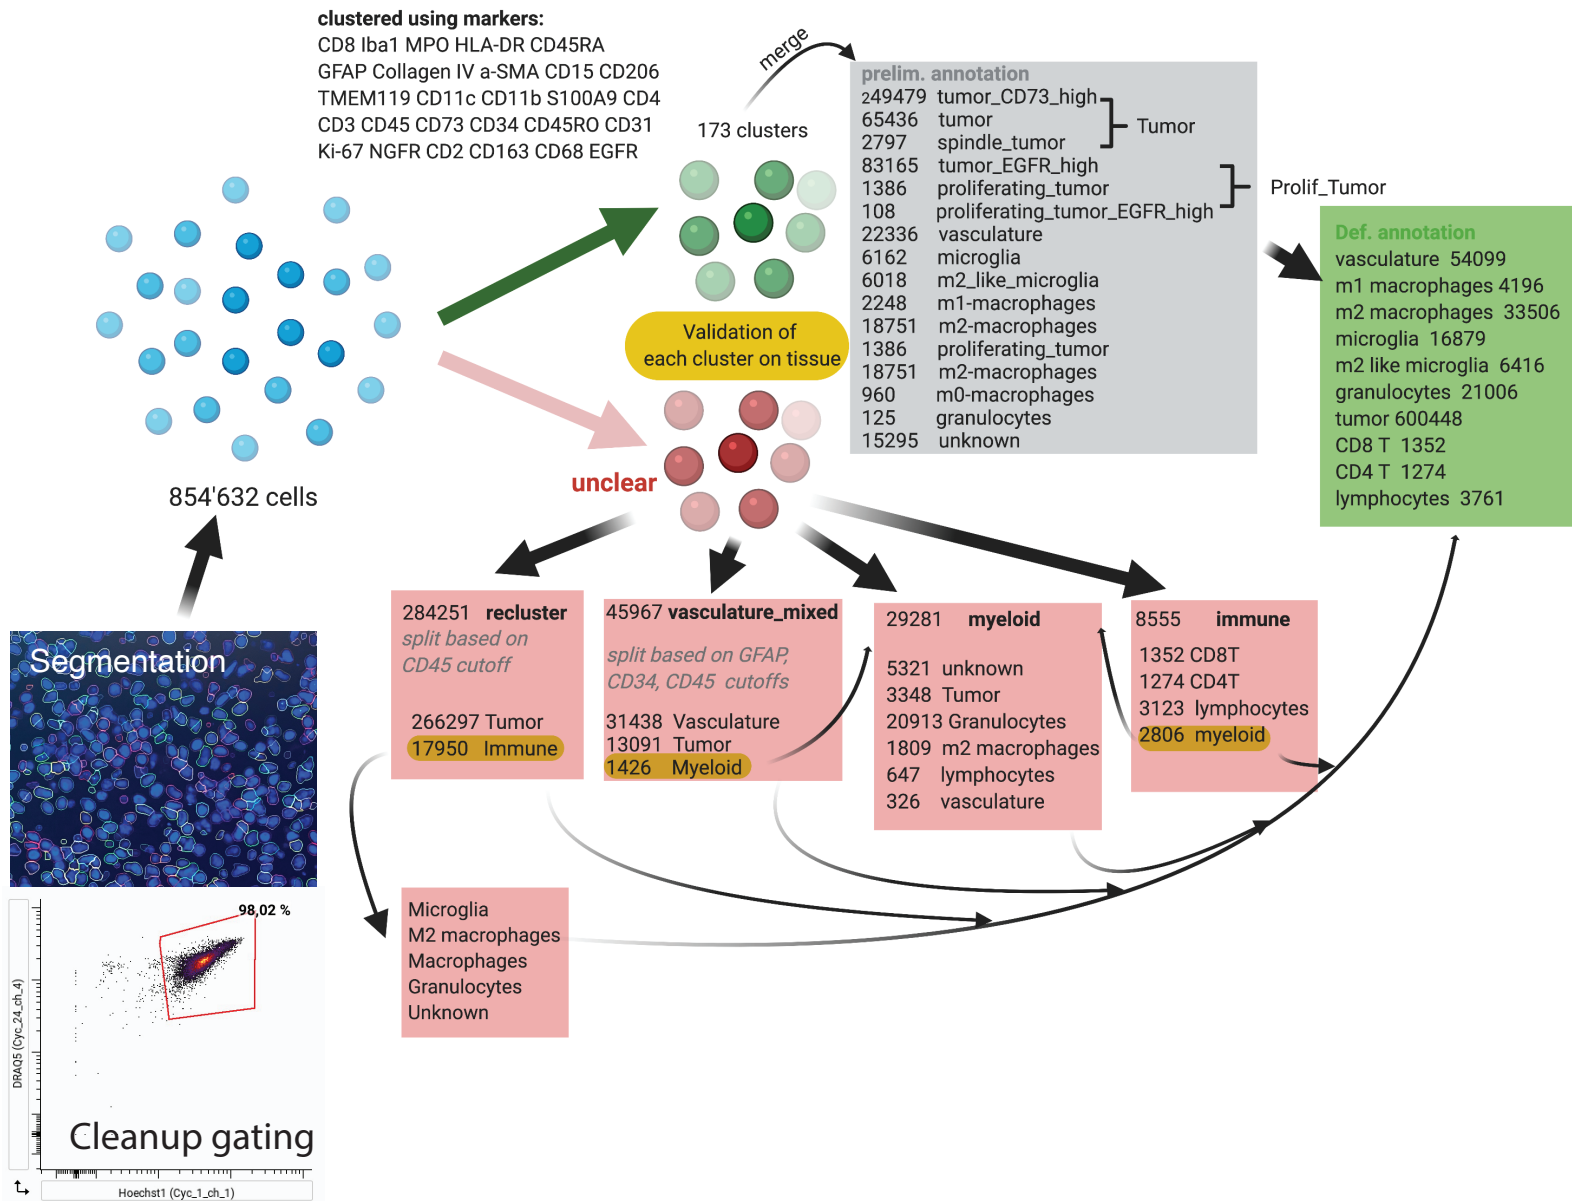

Figure S3

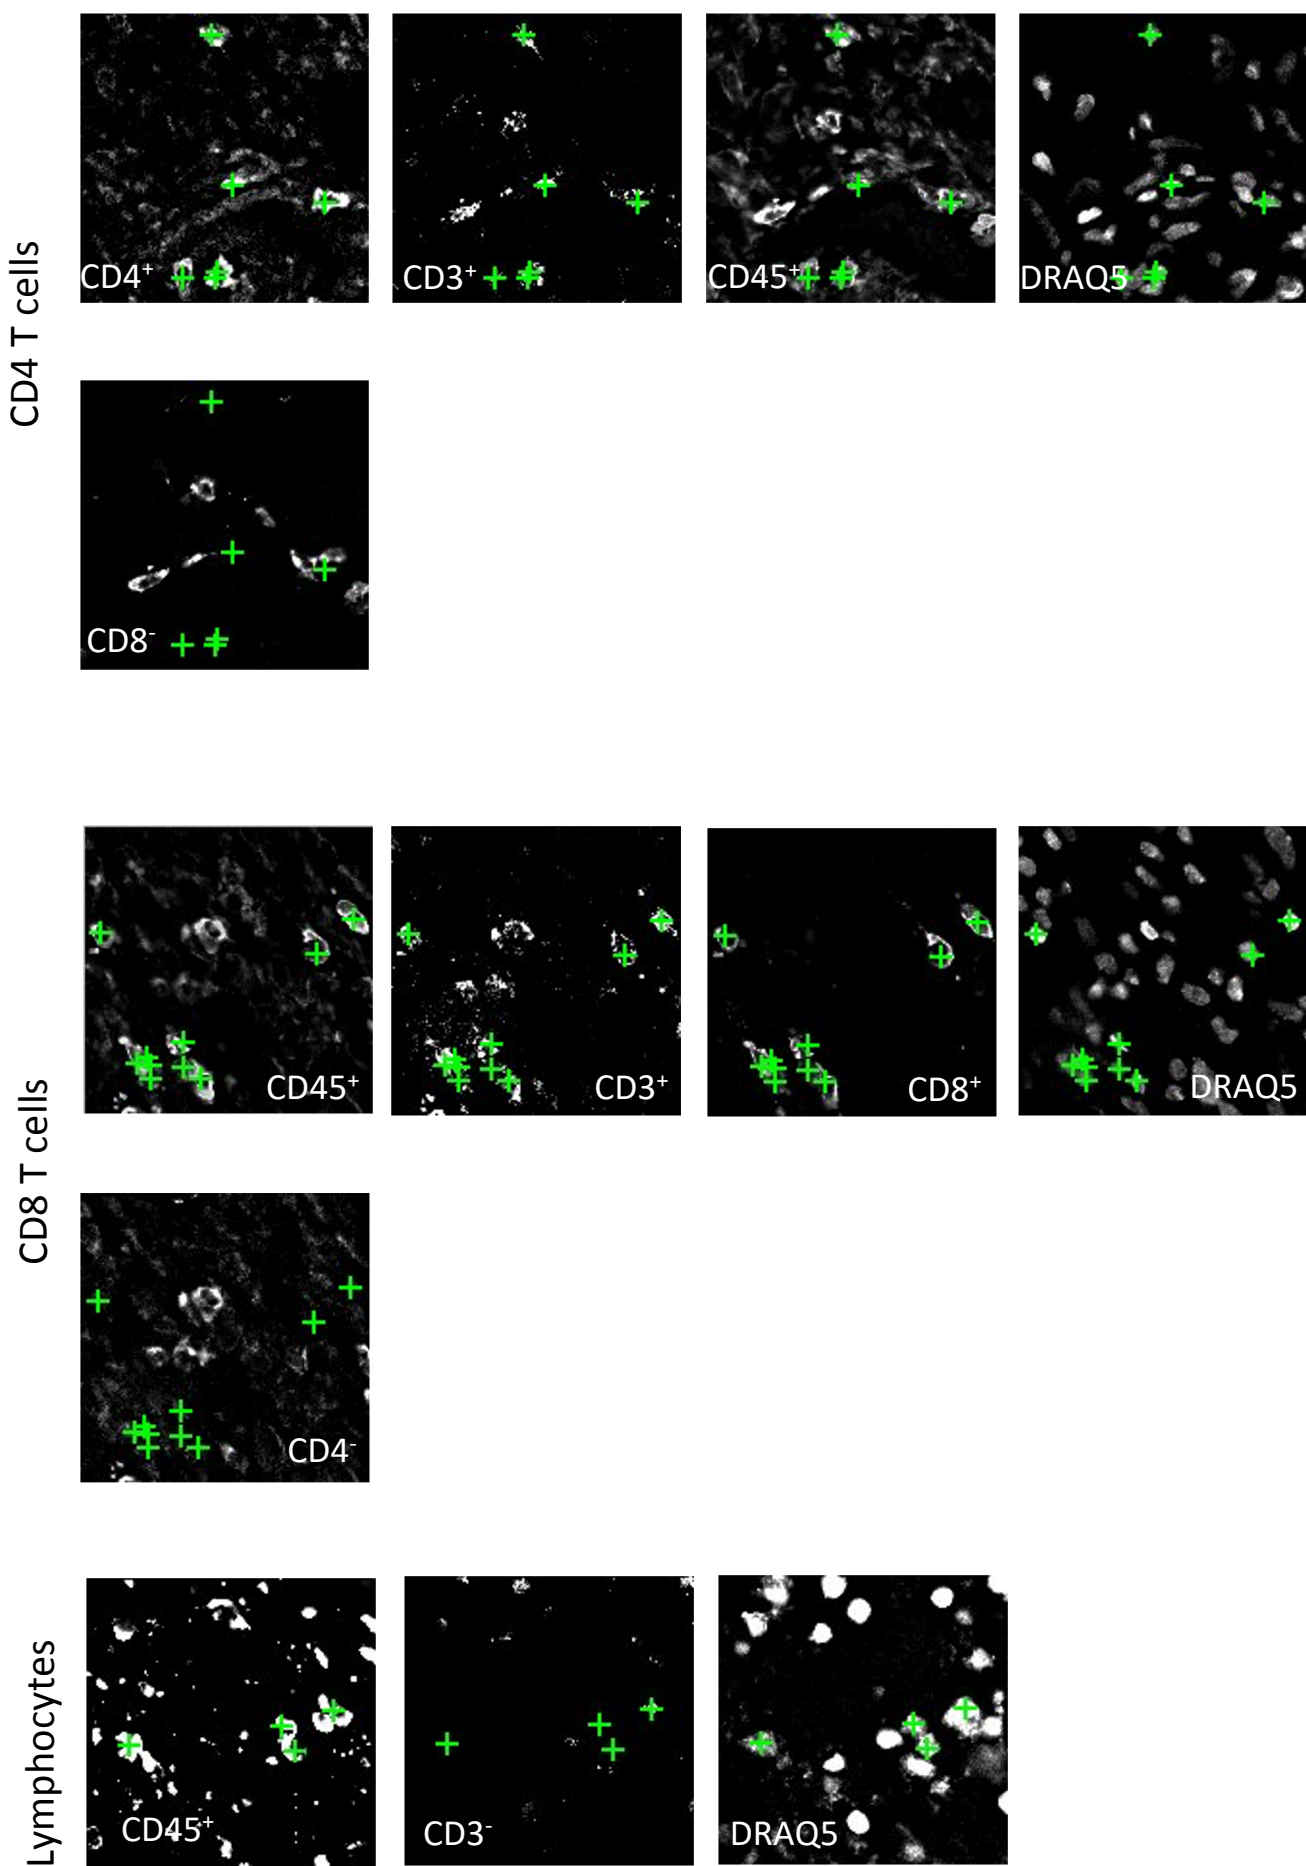

Figure S3

m1 macrophages

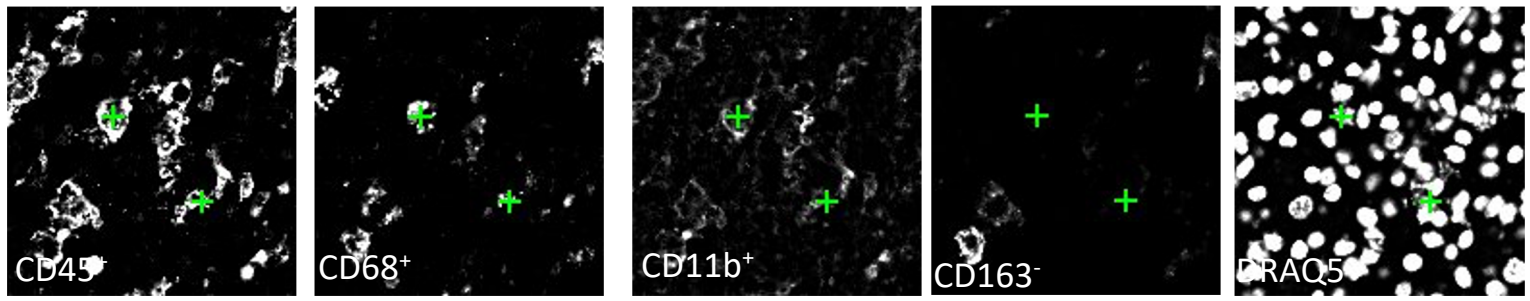

m2 macrophages

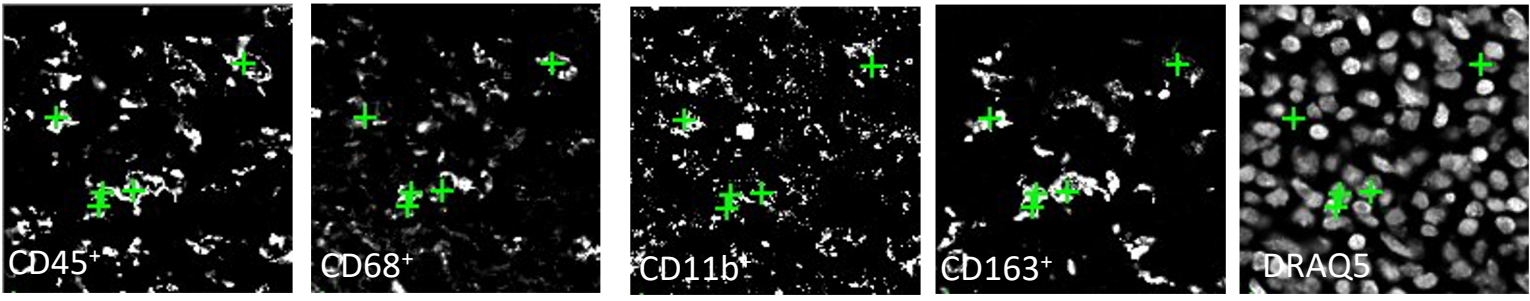

m2 macrophages

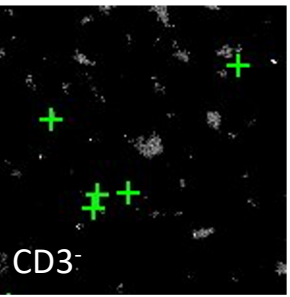

granulocytes

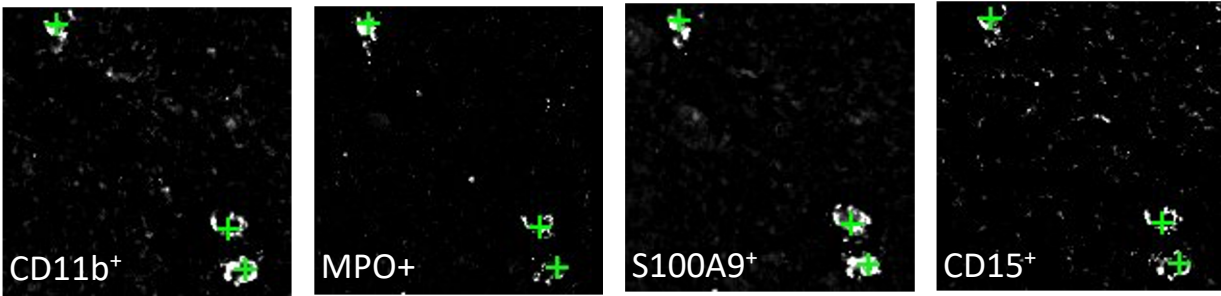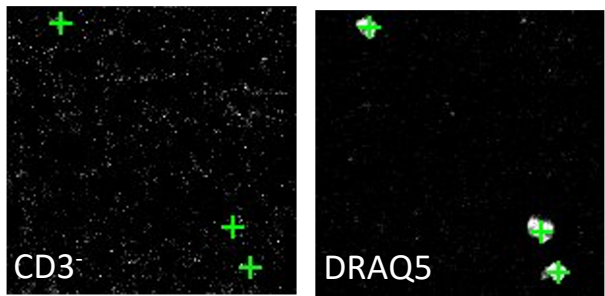

Figure S3



microglia

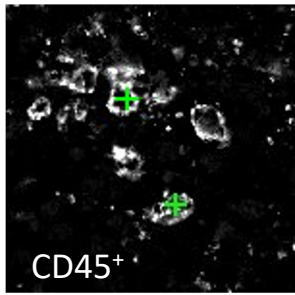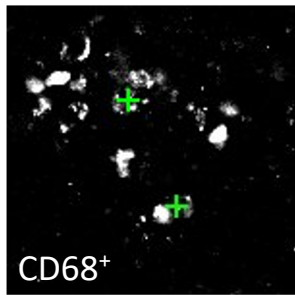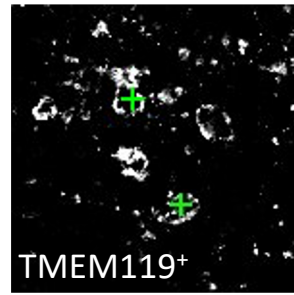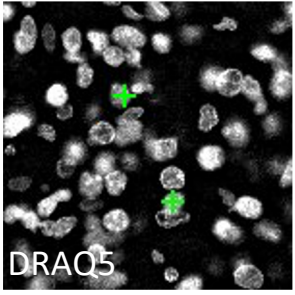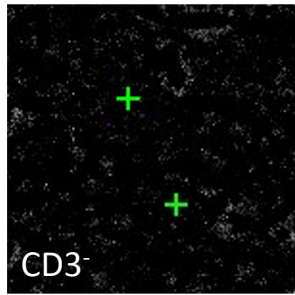

m2 like microglia

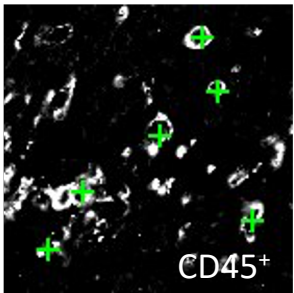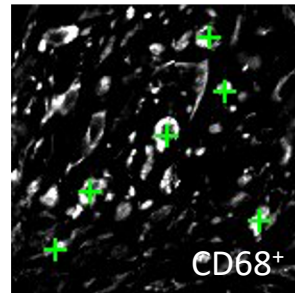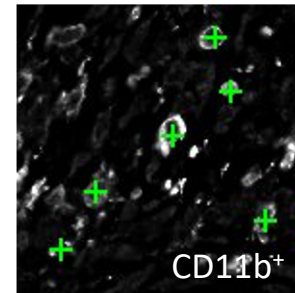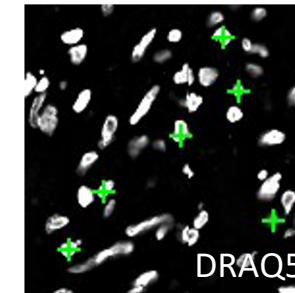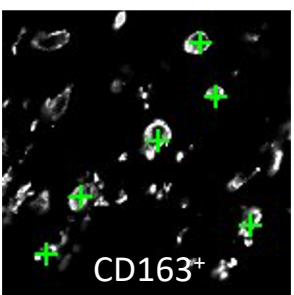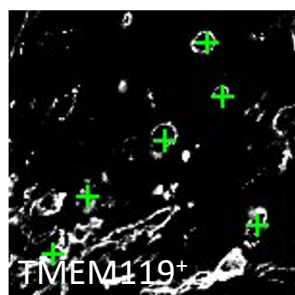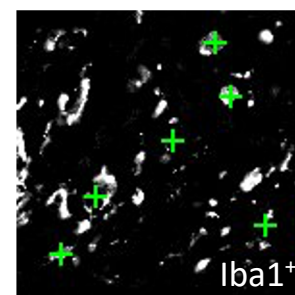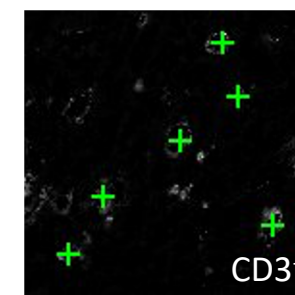

Figure S3

Tumor cells/astrocytes

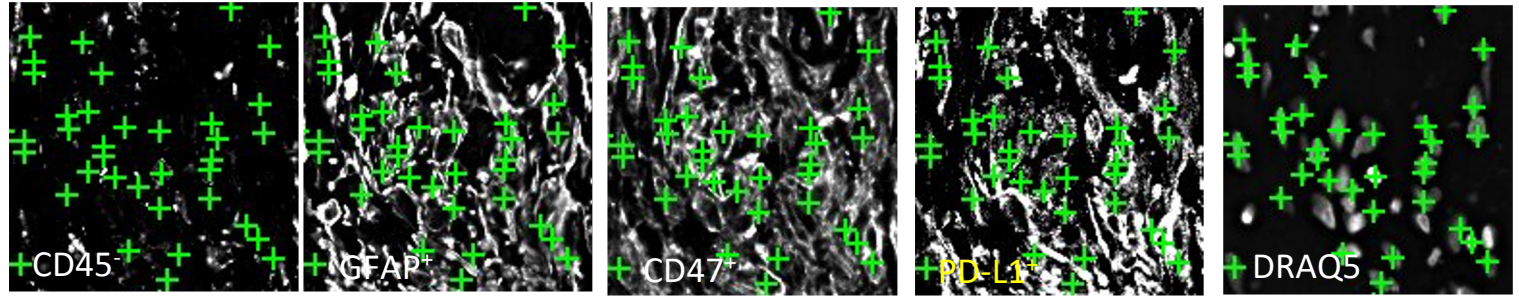

proliferating tumor cells

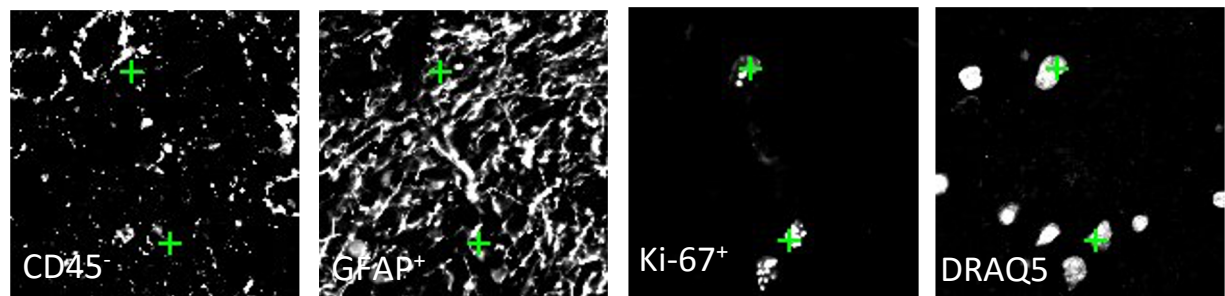

EGFR<sup>+</sup> tumor cells

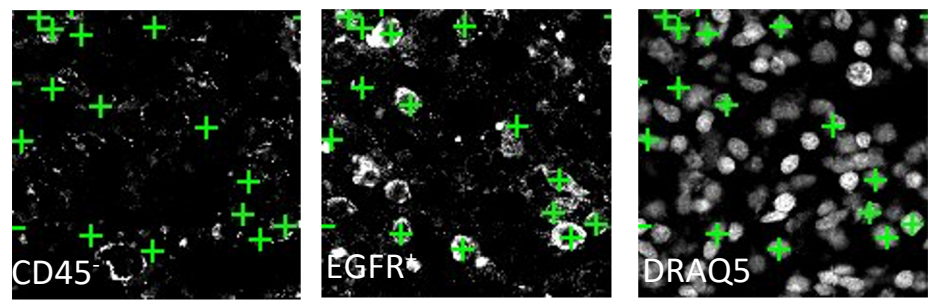

vasculature

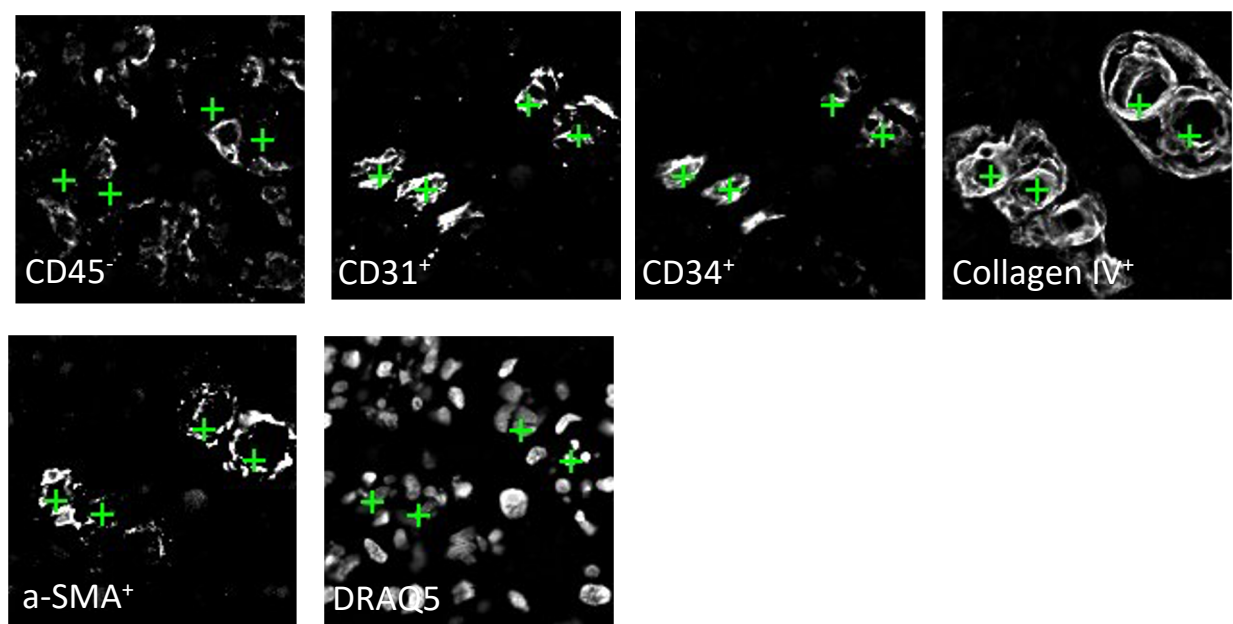

Figure S3



**Figure S3: Detailed clustering strategy, cell passports, and FACS-like gating plots of segmented single cells.**

Page 1: Detailed clustering strategy as outlined in Figure 1C.

Page 2-5: After clustering, single cells from the 173 resulting initial clusters were overlaid on the raw data fluorescent images and on H&E stains of TMAs based on X/Y positions and visually verified based on marker expression profiles, morphology and localization within the tissue. Similar clusters were manually merged, resulting in 10 final clusters. Here, representative clusters are shown as green crosses based on X-Y coordinates of the cells contained in that cluster, overlaid on the montages of different samples. For each of these clusters, examples of markers important for the cluster identification (positive and negative) and DRAQ5 nuclear stain are shown.

Page 6: Flow-cytometry-like plots gated on DRAQ5/Hoechst double-positive single cells were generated from concatenated FCS files of all included cells (CellEngine.com) to confirm the presence of phenotype defining markers on the cell populations of interest. As an example, CD4 T (CD4<sup>+</sup>, CD3<sup>+</sup>), CD8 T (CD3<sup>+</sup>, CD8<sup>+</sup>), microglia (CD45<sup>+</sup>, TMEM119<sup>+</sup>, CD11b<sup>+</sup>, CD163<sup>-</sup>), M2-like microglia (CD45<sup>+</sup>, TMEM119<sup>+</sup>, CD11b<sup>+</sup>, CD163<sup>+</sup>), M1 macrophages (CD45<sup>+</sup>, CD11b<sup>+</sup>, CD163<sup>-</sup>), M2 macrophages (CD45<sup>+</sup>, CD11b<sup>+</sup>, CD163<sup>+</sup>), granulocytes (CD45<sup>+</sup>, CD11b<sup>+</sup>, CD15<sup>+</sup>, S100A9<sup>+</sup>), tumor cells (CD45<sup>-</sup>, GFAP<sup>+</sup>, CD31<sup>-</sup>) and vasculature (CD45<sup>-</sup>, CD31<sup>+</sup>, Collagen-IV<sup>+</sup>) are shown.

# representative center sample

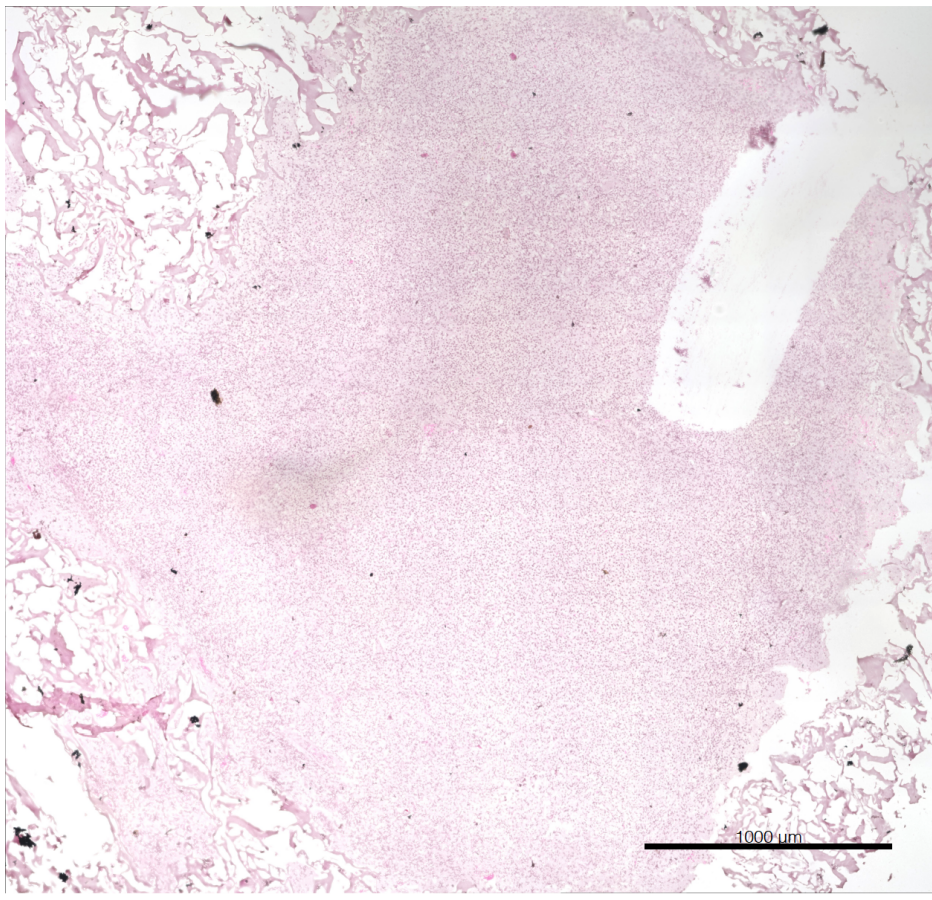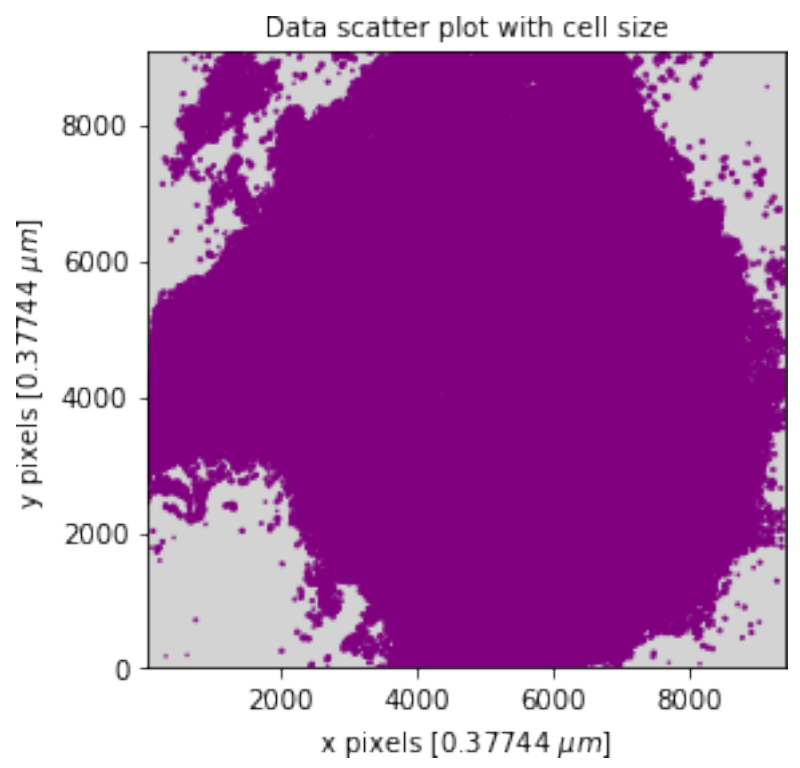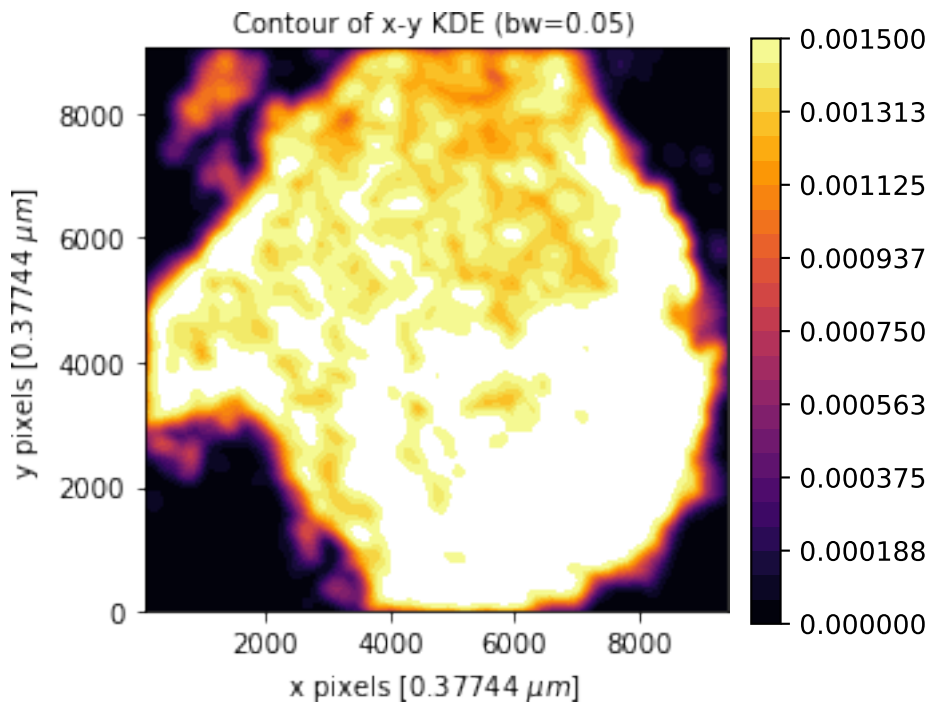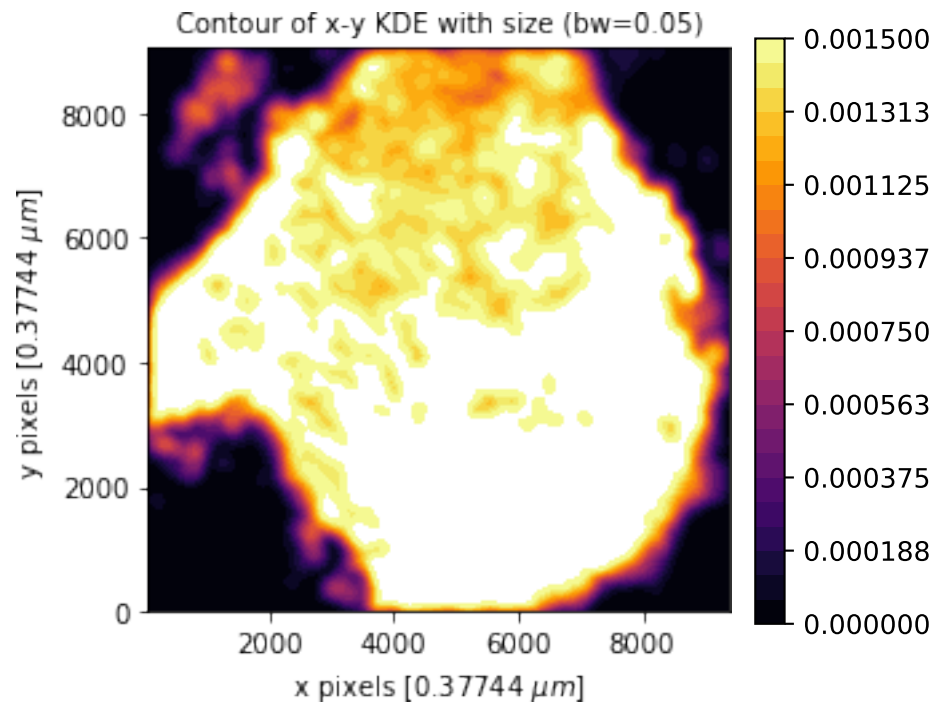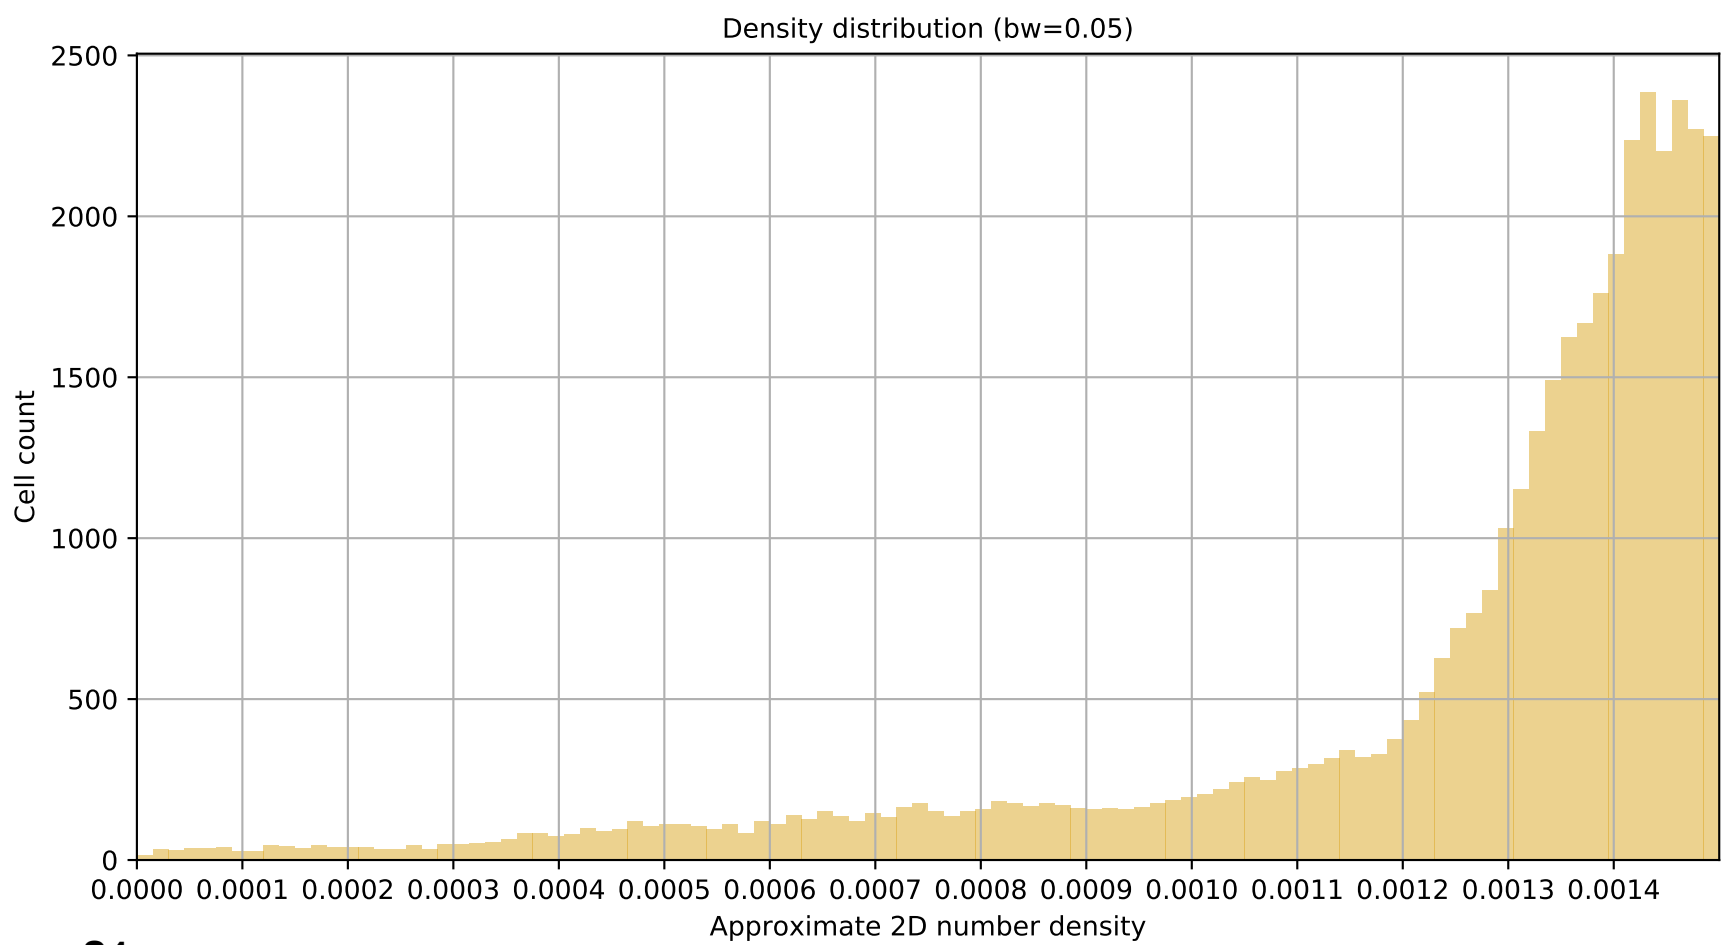

Figure S4

# representative periphery sample

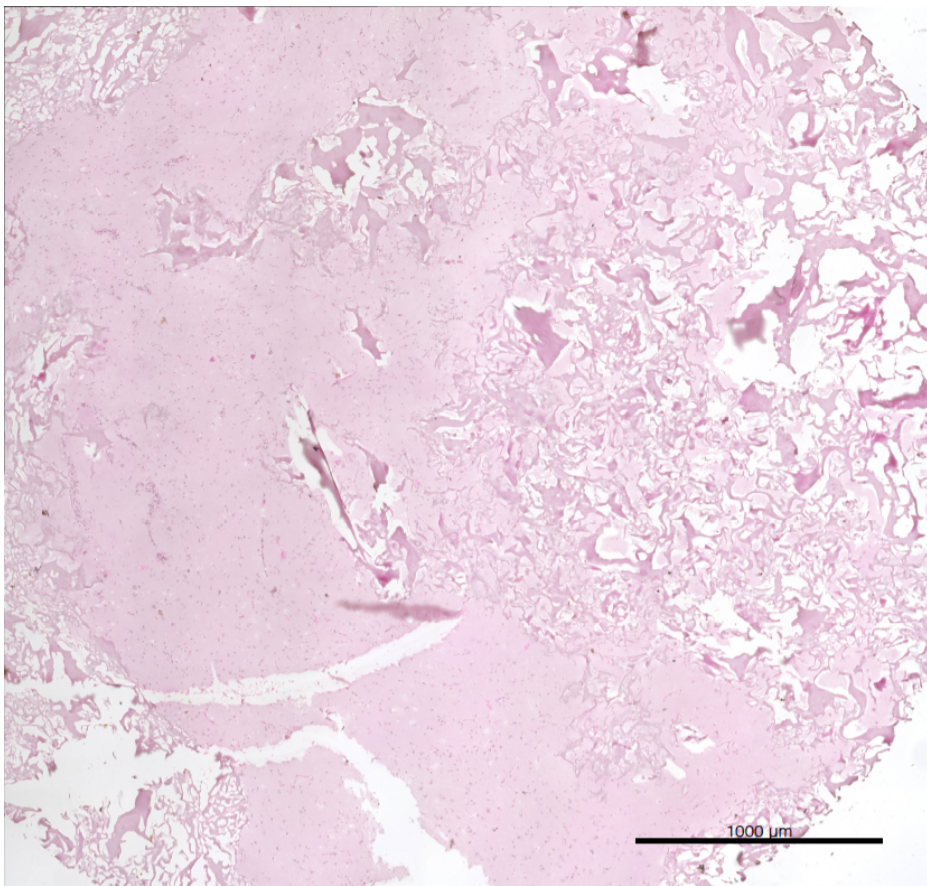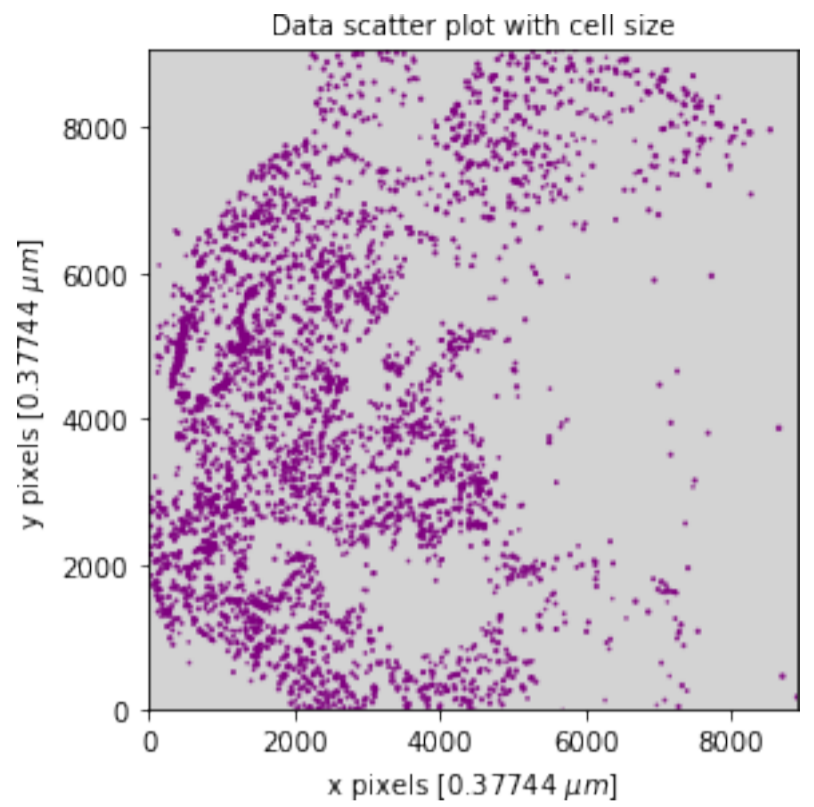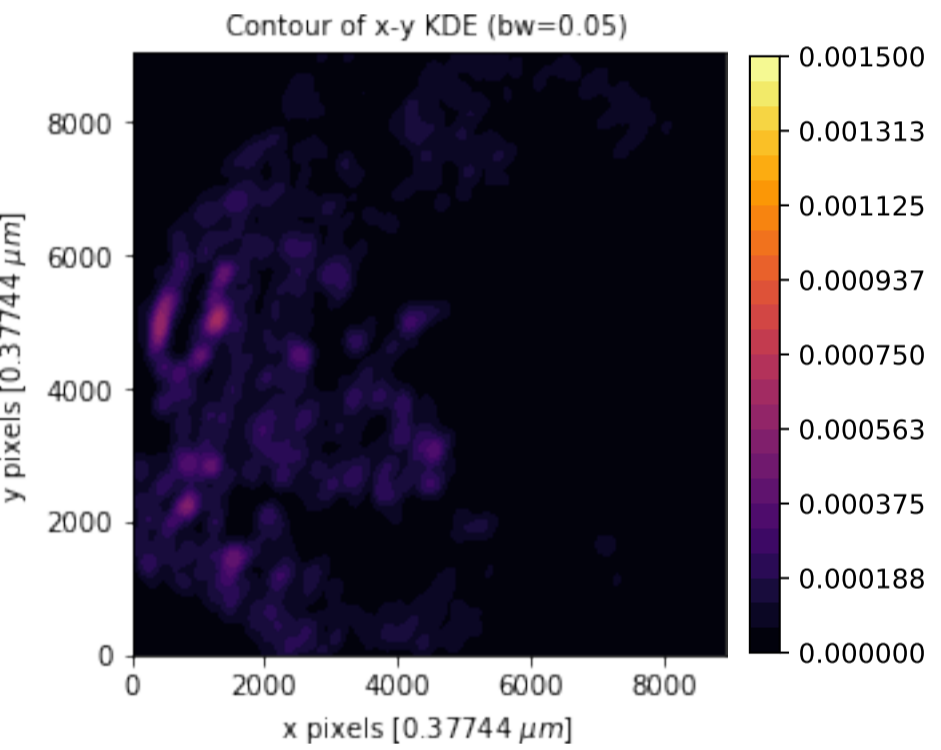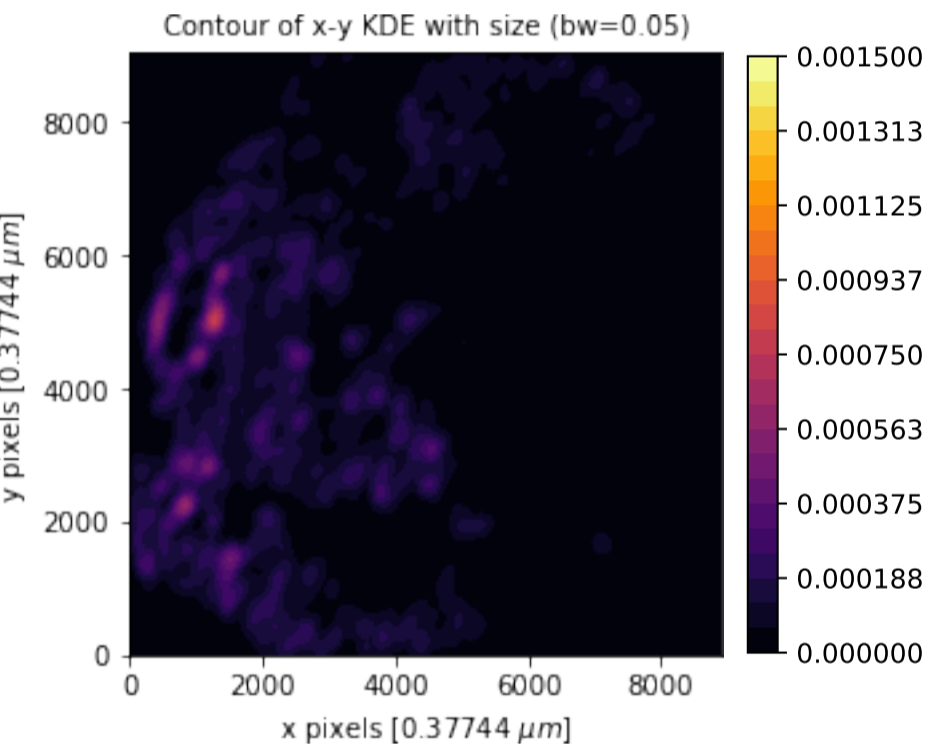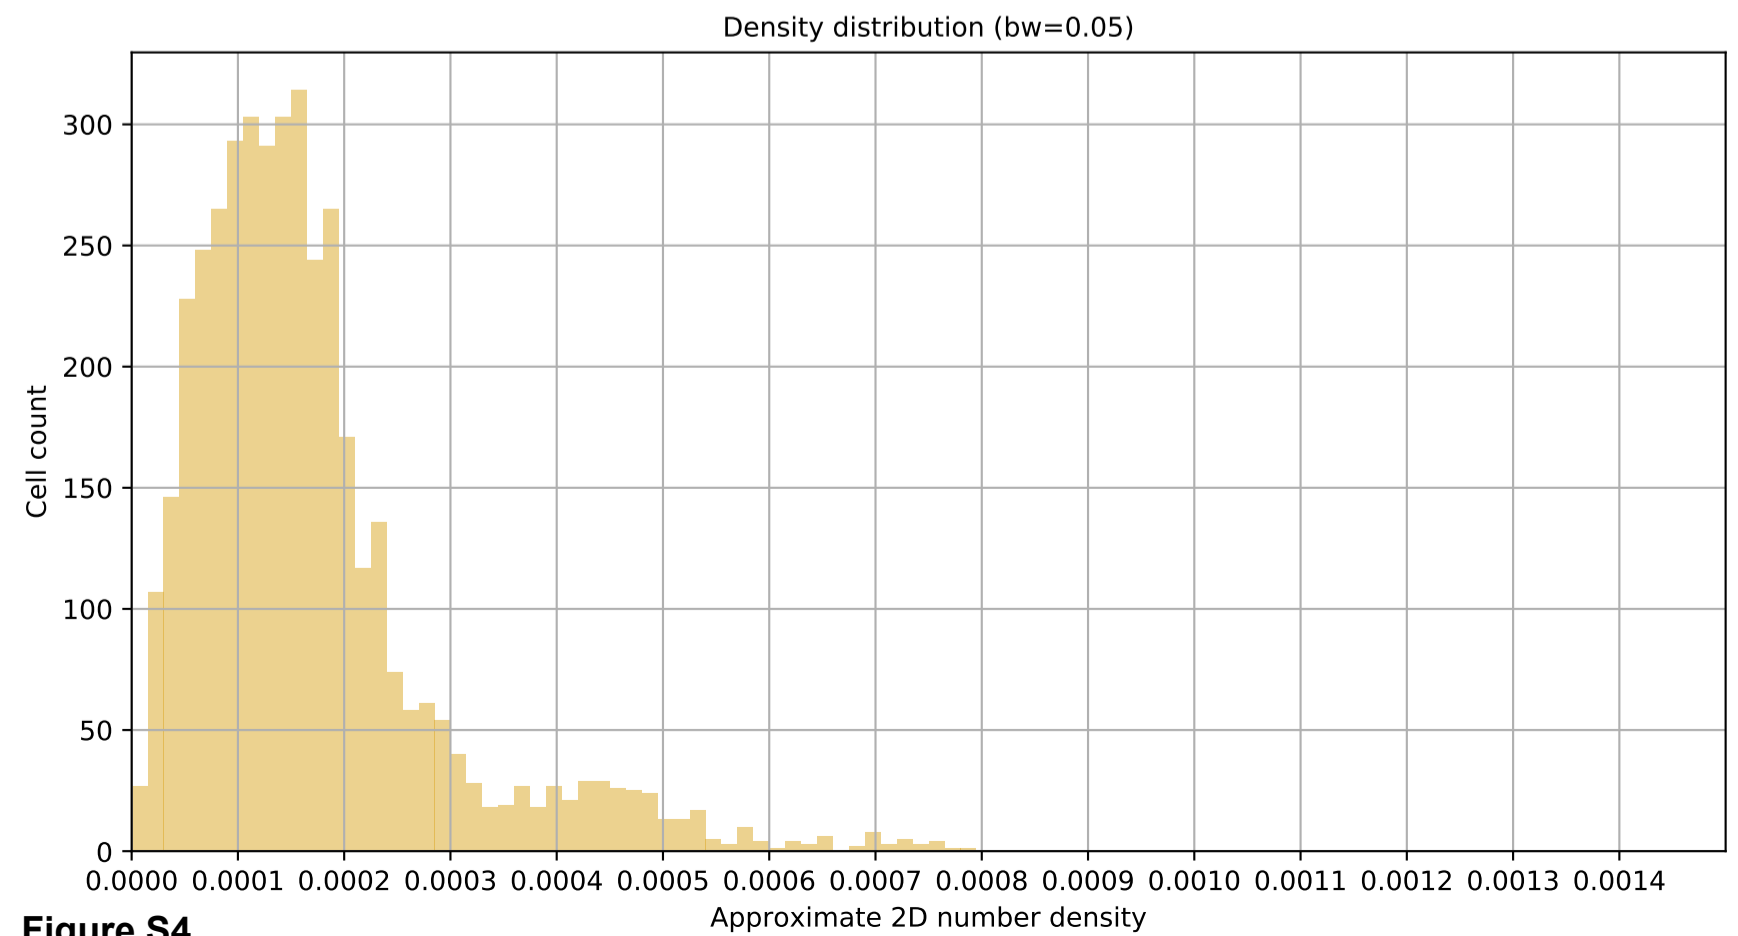

Figure S4

Figure S4

Overview all samples - density histograms

577

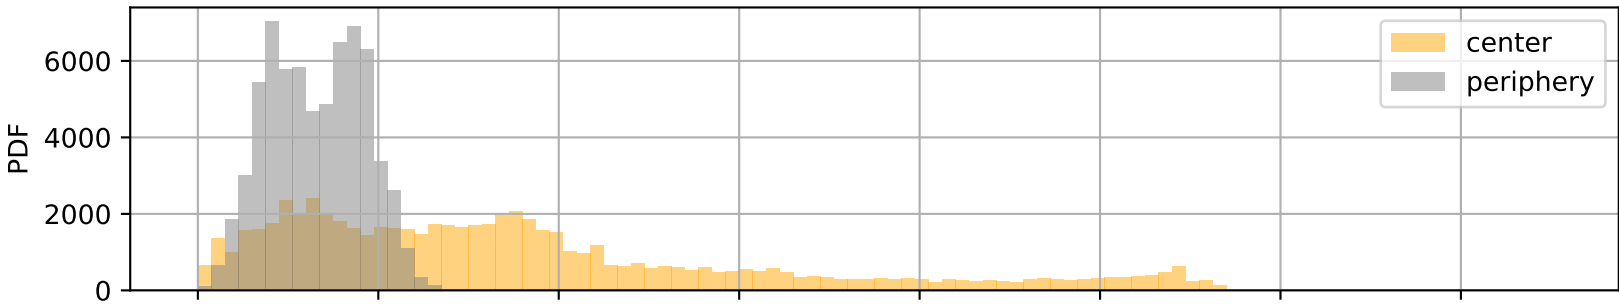

5799

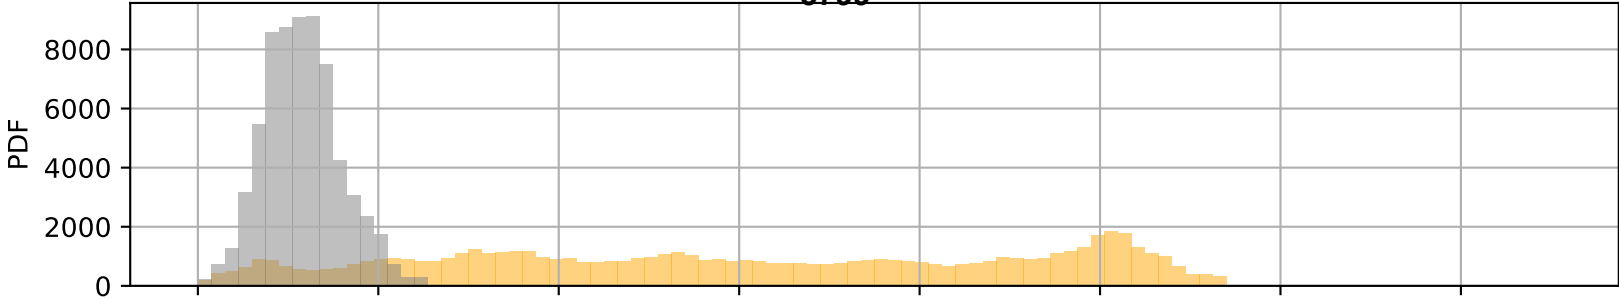

58080

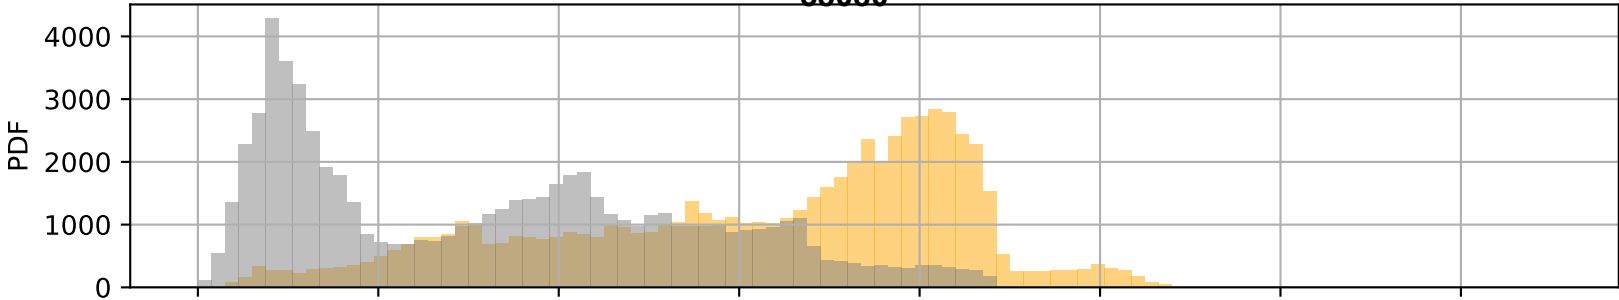

58181

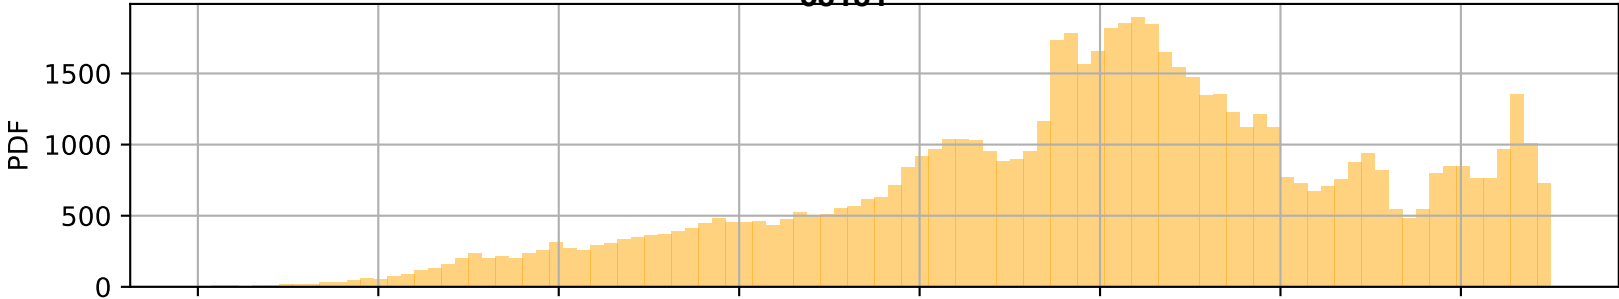

58383

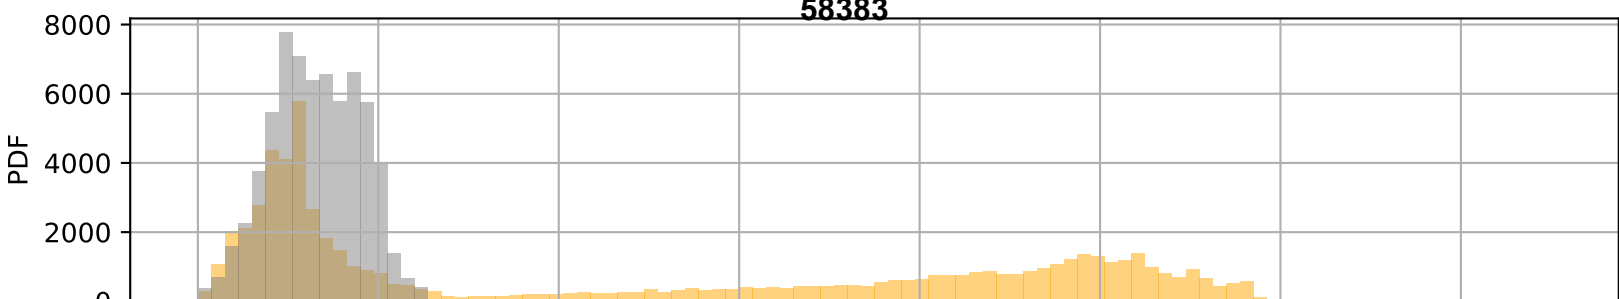

587

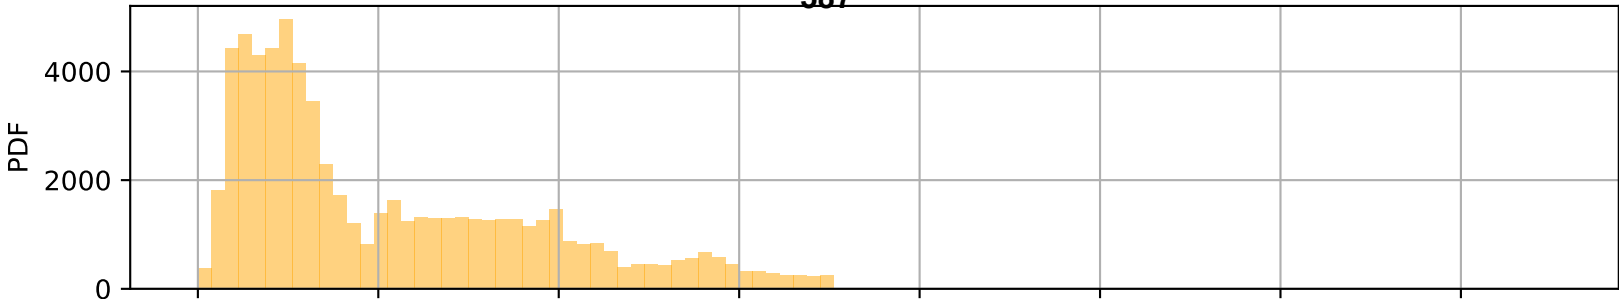

58888

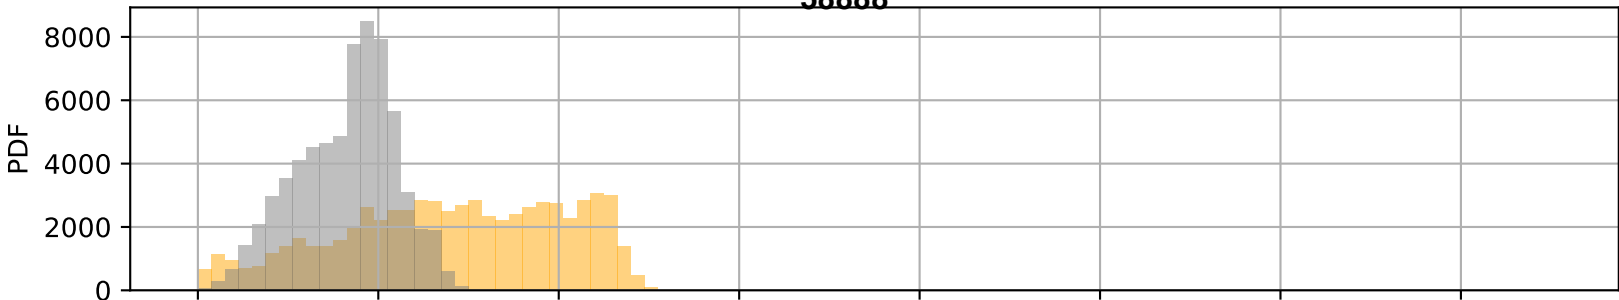

**Fig. S4: Cell density calculations across center and periphery explants**

*Page 1:* exemplary center explant. Top: H&E overview (left), scatter plot of cells with size representation (right). Scale bar: 1000  $\mu\text{m}$ . Middle: KDE (Kernel Density Estimation) of cells according to location based on x-y coordinates (left), and in consideration of cell size (right). Bottom: density distribution histogram and cell number.

*Page 2:* exemplary periphery explant: Top: H&E overview (left), scatter plot of cells with size representation (right). Scale bar: 1000  $\mu\text{m}$ . Middle: KDE (Kernel Density Estimation) of cells according to location based on x-y coordinates (left), and in consideration of cell size (right).. Bw = bandwidth, which determines how smooth the KDE becomes. Bottom: density distribution histogram and cell number.

*Page 3:* smoothed cell density histograms across center and periphery explants.

PDF=probability density function (y-axis), approximate 2D number density (x-axis).



**A**

All explant center vs. All explant periphery

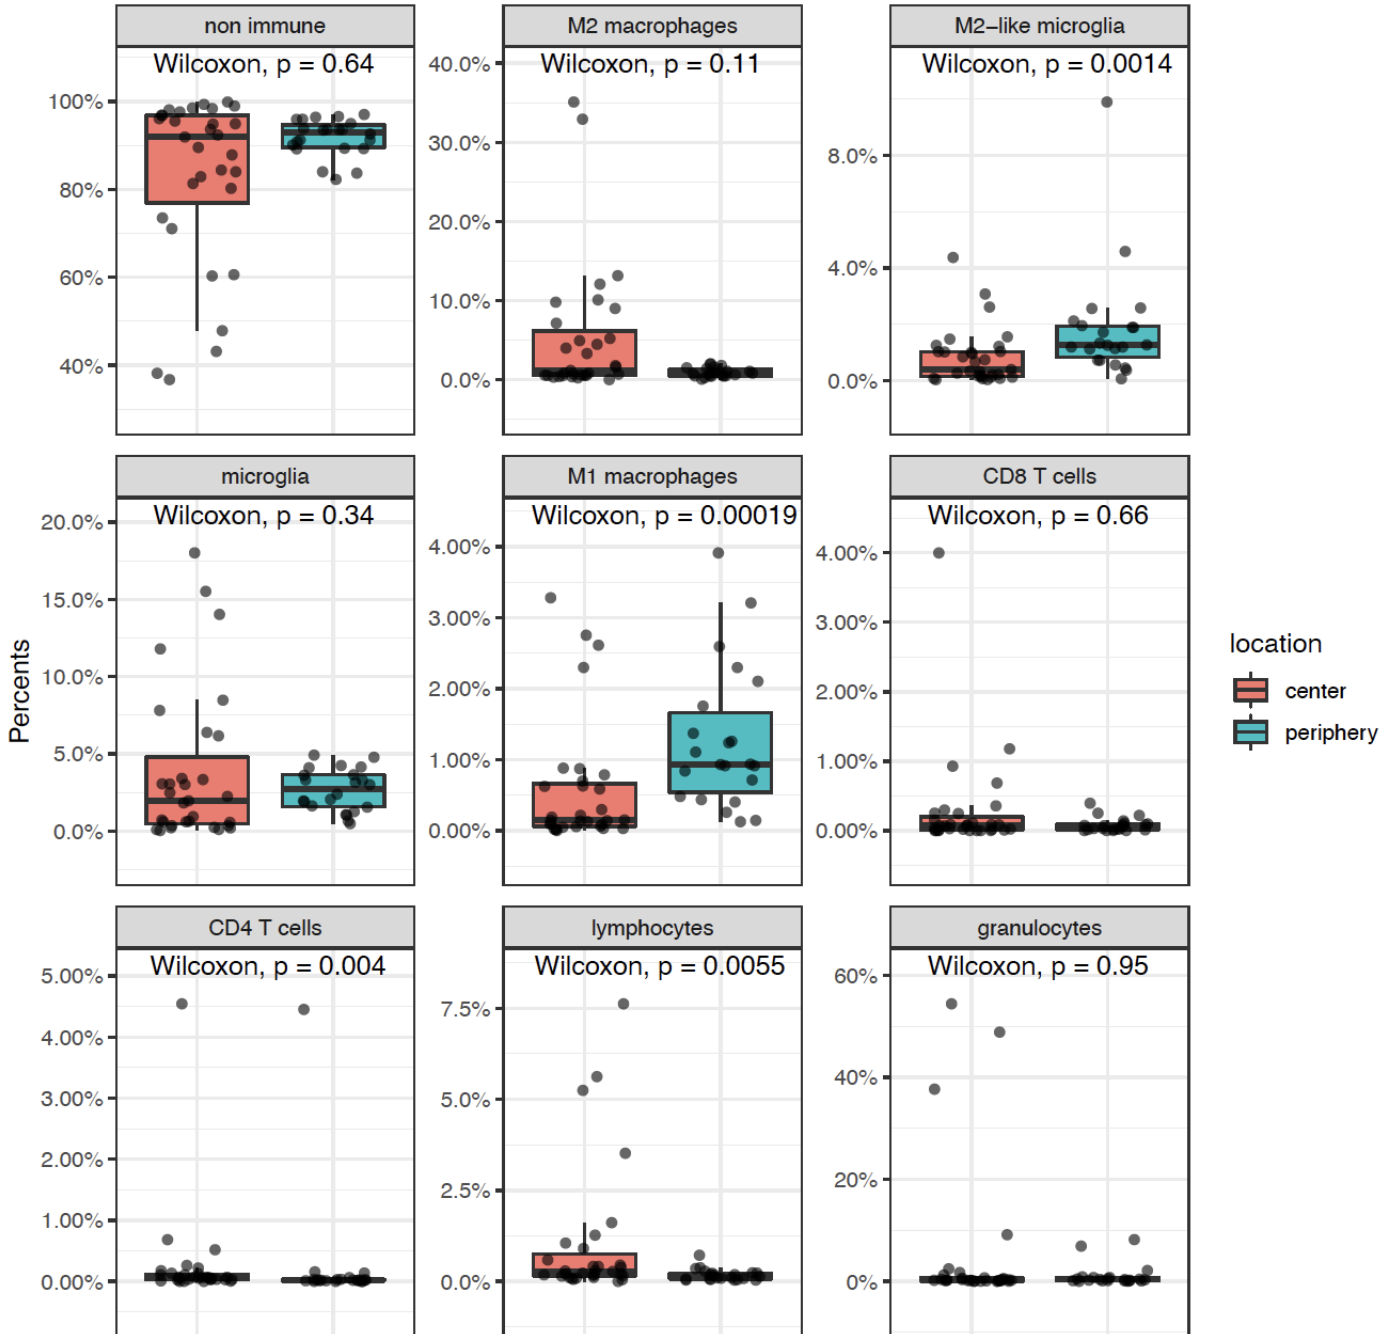**B**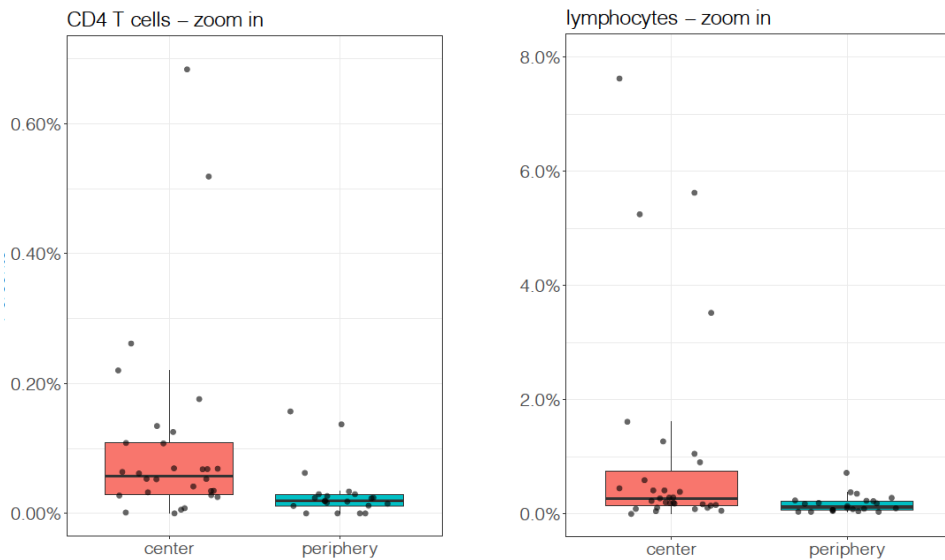**Figure S5**

**Fig. S5. Frequencies of cellular phenotypes (center vs. periphery) in explants.**

Proportions of cellular phenotypes per biopsy location in explants: The proportions of annotated cells per explant are plotted against biopsy location (center vs. periphery). Each dot in the bar graphs corresponds to one bioreactor sample. N=30 center samples and n=23 periphery samples.

Statistics: Wilcoxon tests.

577c

Age: 73  
 Gender: m  
 Subtype: MES  
 MGMT -  
 OS: 500d

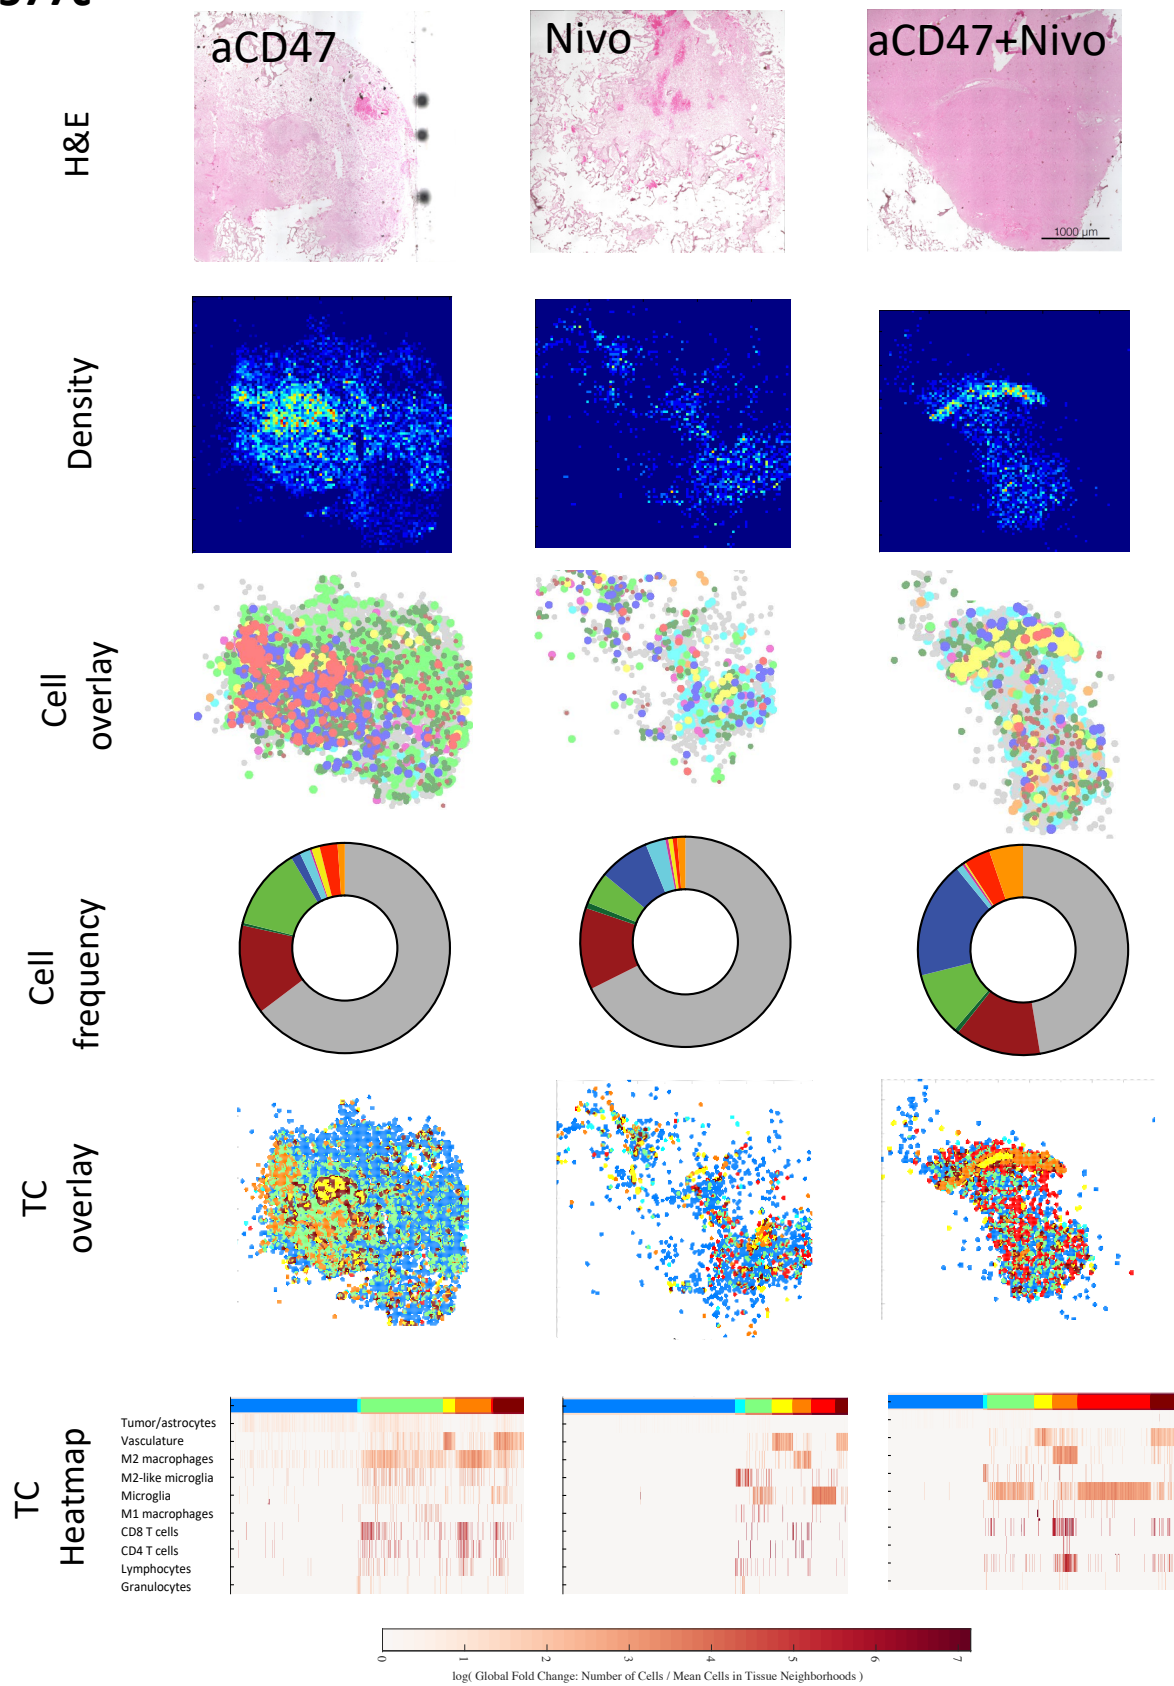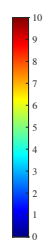

- Tumor/astrocytes
- Vasculature
- M1 Macrophages
- M2 macrophages
- Microglia
- M2-like microglia
- Granulocytes
- CD8 T cells
- CD4 T cells
- Lymphocytes

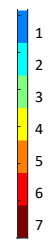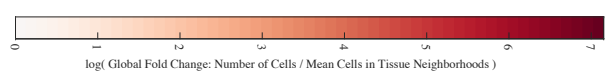

TC enrichment

|                   | 1       | 2       | 3      | 4       | 5      | 6       | 7      |
|-------------------|---------|---------|--------|---------|--------|---------|--------|
| Tumor/astrocytes  | 1.798   | 0.2105  | 2.287  | 0.3214  | 0.7406 | 0.2676  | 1.374  |
| Vasculature       | 0.0293  | 0.05707 | 0.4355 | 4.015   | 0.1124 | 0       | 2.357  |
| M2 macrophages    | 0.1042  | 0.06777 | 1.413  | 0.4068  | 4.033  | 0.05581 | 0.9491 |
| M2-like microglia | 0.1201  | 1.899   | 2.092  | 0.3469  | 1.707  | 0       | 0.7377 |
| Microglia         | 0.02984 | 0.01827 | 0.4908 | 0.4781  | 0.2182 | 5.299   | 0.4719 |
| M1 macrophages    | 0.2185  | 1.83    | 2.091  | 0.02817 | 0.5008 | 1.877   | 0.4558 |
| CD8 T cells       | 0.0675  | 0.1576  | 1.722  | 0.7942  | 3.091  | 0.09371 | 1.074  |
| CD4 T cells       | 0.08244 | 0.4307  | 1.591  | 0.8092  | 2.807  | 0.127   | 1.383  |
| Lymphocytes       | 0.0259  | 2.44    | 0.6546 | 1.716   | 1.249  | 0       | 0.915  |
| Granulocytes      | 0.03297 | 5.465   | 1.059  | 0.1091  | 0.1921 | 0       | 0.1421 |
| Percentage        | 60.37   | 1.662   | 20.01  | 2.999   | 6.285  | 0.4205  | 8.267  |

  

|                   | 1        | 2       | 3      | 4       | 5       | 6        | 7      |
|-------------------|----------|---------|--------|---------|---------|----------|--------|
| Tumor/astrocytes  | 1.939    | 0.2241  | 2.428  | 0.09325 | 0.4822  | 0.4490   | 1.328  |
| Vasculature       | 0.0175   | 0.02829 | 0.6306 | 3.349   | 0.2098  | 0.02762  | 2.722  |
| M2 macrophages    | 0.001412 | 0       | 0.4531 | 0.2488  | 5.9     | 0.007456 | 0.389  |
| M2-like microglia | 0.009541 | 3.898   | 1.909  | 0.2391  | 0.1284  | 0.4045   | 0.4158 |
| Microglia         | 0.002276 | 0.01025 | 1.101  | 0.1205  | 0.1082  | 5.217    | 0.9423 |
| M1 macrophages    | 0        | 3.024   | 2.662  | 0.1376  | 0.06181 | 0.7803   | 0.334  |
| CD8 T cells       | 0        | 0       | 1.115  | 0.3099  | 4.03    | 0.125    | 0.8198 |
| CD4 T cells       | 0.04143  | 0.7287  | 1.754  | 0.3274  | 3.898   | 0.08274  | 0.1802 |
| Lymphocytes       | 0.000332 | 3.125   | 1.362  | 0.8055  | 0.8283  | 0.2023   | 0.8747 |
| Granulocytes      | 0.03593  | 5.235   | 1.401  | 0       | 0.2135  | 0        | 0.1152 |
| Percentage        | 68.04    | 2.941   | 10.67  | 4.549   | 3.383   | 4.539    | 5.18   |

  

|                   | 1         | 2       | 3      | 4       | 5      | 6        | 7      |
|-------------------|-----------|---------|--------|---------|--------|----------|--------|
| Tumor/astrocytes  | 1.782     | 0.2513  | 2.331  | 0.05486 | 0.8757 | 0.4291   | 1.278  |
| Vasculature       | 0.01271   | 0.08168 | 0.5262 | 5.32    | 0.5256 | 0.8853   | 2.472  |
| M2 macrophages    | 0.0007624 | 0       | 0.2448 | 0.2142  | 6.012  | 0.03577  | 0.4926 |
| M2-like microglia | 0.007761  | 5.135   | 0.9164 | 0.2722  | 0.2914 | 0.158    | 0.221  |
| Microglia         | 0.01322   | 0.01081 | 1.45   | 0.1675  | 0.5445 | 4.154    | 0.6905 |
| M1 macrophages    | 0         | 2.433   | 1.051  | 0.2636  | 1.545  | 0.9196   | 0.787  |
| CD8 T cells       | 0.000869  | 0.09708 | 0.557  | 0.114   | 5.218  | 0.1041   | 0.9071 |
| CD4 T cells       | 0.1059    | 0       | 1.121  | 0       | 4.963  | 0.1053   | 0.7083 |
| Lymphocytes       | 0.005323  | 0.6524  | 0.5483 | 0.1691  | 4.734  | 0.1931   | 0.8373 |
| Granulocytes      | 0.03321   | 5.042   | 1.284  | 0.0379  | 0.3761 | 0.006745 | 0.2398 |
| Percentage        | 55.38     | 1.852   | 14.18  | 4.048   | 4.008  | 12.73    | 7.294  |

Figure S6

577 p

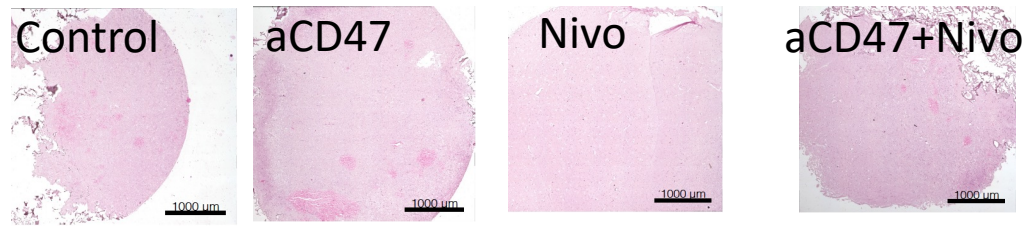

H&E

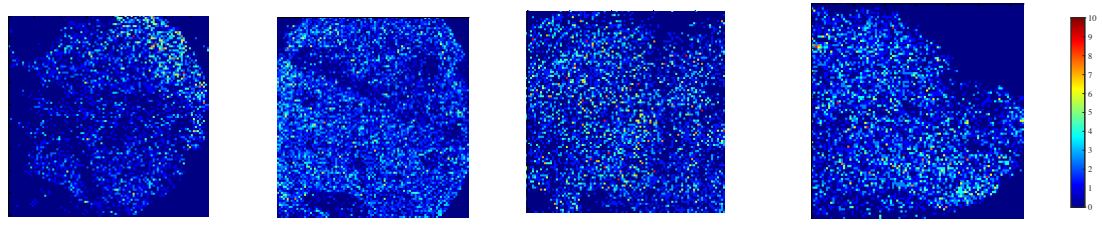

Density

Cell overlay

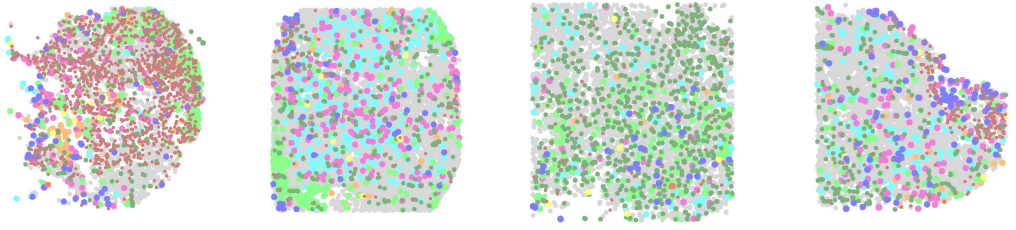

- Tumor/astrocytes
- Vasculature
- M1 Macrophages
- M2 macrophages
- Microglia
- M2-like microglia
- Granulocytes
- CD8 T cells
- CD4 T cells
- Lymphocytes

Cell frequency

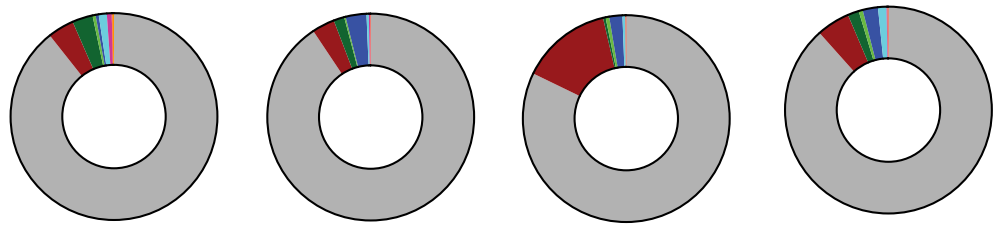

TC overlay

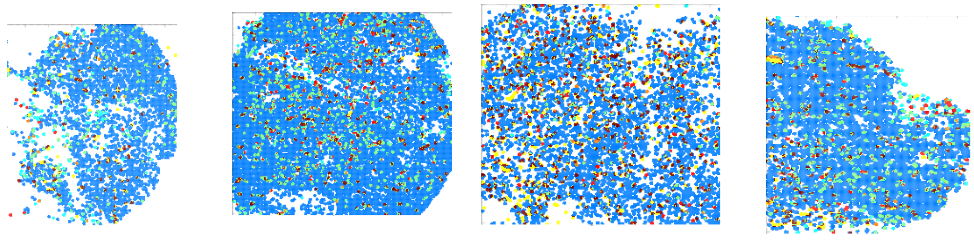

TC Heatmap

- Tumor/astrocytes
- Vasculature
- M2 macrophages
- M2-like microglia
- Microglia
- M1 macrophages
- CD8 T cells
- CD4 T cells
- Lymphocytes
- Granulocytes

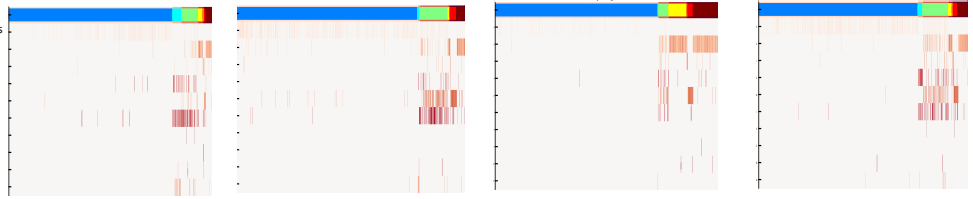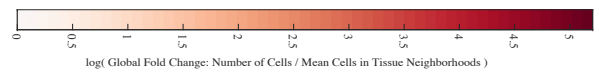

TC enrichment

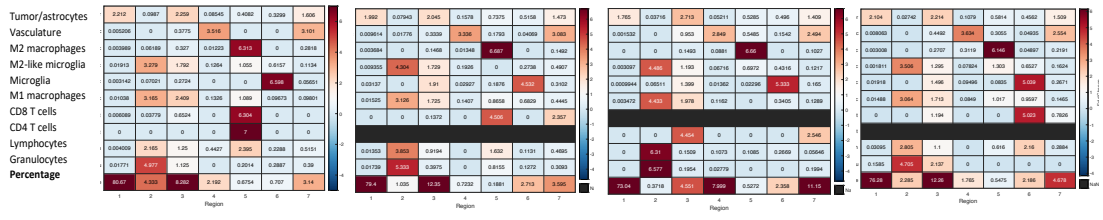

enrichment score

Figure S6

579c

Age: 58  
 Gender: f  
 Subtype: MES  
 MGMT -  
 OS: 505d

aCD47+Nivo

H&E

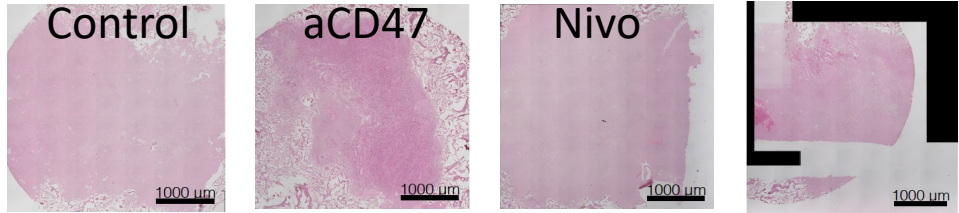

Density

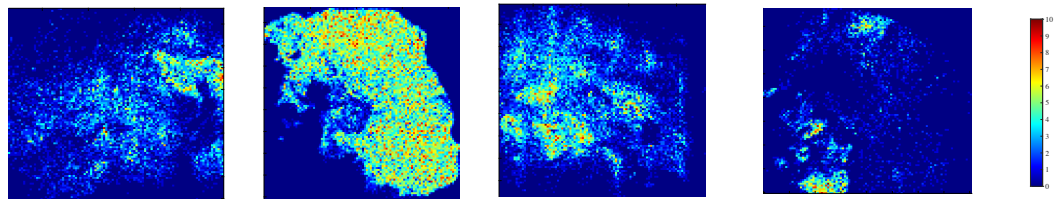

Cell overlay

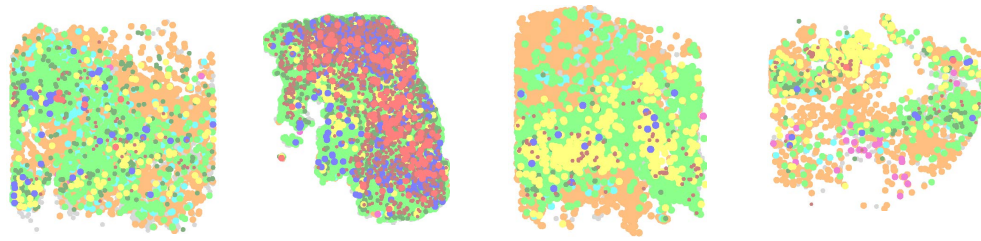

Cell frequency

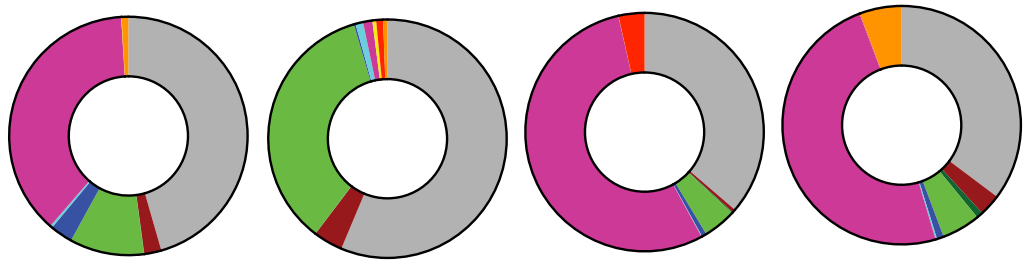

- Tumor/astrocytes
- Vasculature
- M1 Macrophages
- M2 macrophages
- Microglia
- M2-like microglia
- Granulocytes
- CD8 T cells
- CD4 T cells
- Lymphocytes

TC overlay

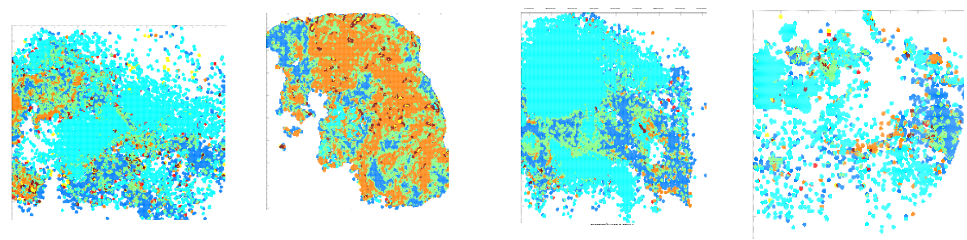

TC Heatmap

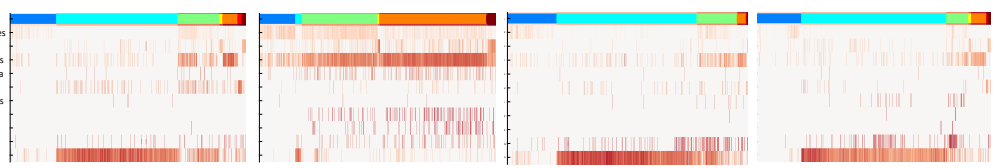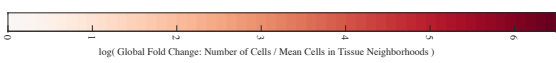

TC enrichment

|                   | 1       | 2      | 3      | 4       | 5      | 6       | 7      |
|-------------------|---------|--------|--------|---------|--------|---------|--------|
| Tumor/astrocytes  | 1.738   | 0.2091 | 0.308  | 0.01048 | 1.329  | 0.2614  | 0.8874 |
| Vasculature       | 0.07196 | 0.118  | 0.2402 | 0.501   | 0.2323 | 0.2142  | 0.287  |
| M2 macrophages    | 0.1171  | 0.0328 | 1.744  | 0.07023 | 0.628  | 0.08504 | 0.2854 |
| M2-like microglia | 0.04713 | 0.2884 | 1.795  | 0.2774  | 0.451  | 1.038   | 0.4614 |
| Microglia         | 0.0588  | 0.054  | 0.4475 | 0.03379 | 0.8264 | 4.759   | 0.239  |
| M1 macrophages    | 0       | 0.017  | 0.001  | 0       | 1.142  | 0       | 0      |
| CD8 T cells       | 0       | 1.801  | 0      | 0       | 0      | 0       | 0.169  |
| CD4 T cells       | 0.0375  | 0.1688 | 0.031  | 0.0424  | 0.807  | 0       | 0.280  |
| Lymphocytes       | 0.00794 | 0.0793 | 1.112  | 0.0117  | 1.314  | 0.361   | 0.286  |
| Granulocytes      | 0.07788 | 0.073  | 1.209  | 0.1188  | 0.989  | 0.4617  | 0.8824 |
| Percentage        | 10.45   | 10.38  | 17.8   | 1.432   | 8.4    | 1.778   | 1.816  |

  

|                   | 1       | 2       | 3      | 4       | 5      | 6       | 7      |
|-------------------|---------|---------|--------|---------|--------|---------|--------|
| Tumor/astrocytes  | 0.248   | 0.2883  | 0.142  | 0.1779  | 1.272  | 0.1548  | 0.8402 |
| Vasculature       | 0.04755 | 0.07712 | 0.1764 | 0.762   | 0.3071 | 0       | 0.2828 |
| M2 macrophages    | 0.0204  | 0.0201  | 1.58   | 0.6013  | 0.171  | 0.02028 | 1.014  |
| M2-like microglia | 0.0205  | 0.0447  | 1.875  | 0.1425  | 0.717  | 0       | 0.9544 |
| Microglia         | 0.01989 | 0.306   | 0.157  | 0.03885 | 0.2285 | 4.642   | 0.2004 |
| M1 macrophages    | 1.289   | 2.321   | 1.829  | 0       | 1.521  | 0       | 0.2381 |
| CD8 T cells       | 0.0411  | 0.0816  | 0.0201 | 1.138   | 0.2442 | 0       | 0.2381 |
| CD4 T cells       | 0.08837 | 0.207   | 0.0883 | 1.3     | 1.615  | 0       | 0.531  |
| Lymphocytes       | 0.05875 | 1.875   | 0.0885 | 1.411   | 1.287  | 0       | 1.661  |
| Granulocytes      | 0.04811 | 1.423   | 0.2041 | 0.2148  | 0.1522 | 0.2076  | 0.4414 |

  

|                   | 1       | 2       | 3       | 4      | 5       | 6      | 7       |
|-------------------|---------|---------|---------|--------|---------|--------|---------|
| Tumor/astrocytes  | 2.127   | 0.4577  | 0.483   | 0      | 0.779   | 0.2588 | 0.0716  |
| Vasculature       | 0.02787 | 0.0288  | 0.06877 | 0.153  | 0.08818 | 0      | 0.0314  |
| M2 macrophages    | 0.1821  | 0.2685  | 1.6     | 0      | 1.4     | 0      | 0.9608  |
| M2-like microglia | 0       | 0.2408  | 0.8028  | 0      | 1.4     | 0      | 0.533   |
| Microglia         | 0.03108 | 0.239   | 0.4071  | 0      | 0.2581  | 0.175  | 0.04889 |
| M1 macrophages    | 0.2894  | 1.081   | 4.731   | 0      | 0.8888  | 0      | 0.8888  |
| CD8 T cells       | 0       | 0.08075 | 1.123   | 0      | 0.2713  | 0      | 0.601   |
| CD4 T cells       | 0       | 0.4878  | 0.094   | 0      | 1.495   | 0      | 0       |
| Lymphocytes       | 0.00819 | 0.308   | 1.214   | 0.4035 | 1.306   | 0      | 0.414   |
| Granulocytes      | 0.08125 | 4.644   | 1.122   | 0      | 0.3823  | 0.2026 | 0.5176  |

  

|                   | 1       | 2      | 3      | 4        | 5       | 6       | 7      |
|-------------------|---------|--------|--------|----------|---------|---------|--------|
| Tumor/astrocytes  | 2.243   | 0.2241 | 0.201  | 0.008711 | 0.2422  | 0.2237  | 1.007  |
| Vasculature       | 0.03024 | 0.1788 | 0.405  | 0.324    | 0.1214  | 0.1822  | 0.428  |
| M2 macrophages    | 0.1273  | 0.2229 | 1.32   | 0.1778   | 4.249   | 0.02837 | 0.4244 |
| M2-like microglia | 0.02021 | 0.5422 | 2.427  | 0        | 0.401   | 0       | 0      |
| Microglia         | 0.01778 | 0.1778 | 0.3779 | 0        | 0.08835 | 1.027   | 0.429  |
| M1 macrophages    | 0.1824  | 1.029  | 4.251  | 0.2222   | 0.2024  | 0.3713  | 0.132  |
| CD8 T cells       | 0       | 0.5843 | 0.777  | 0        | 2.887   | 0       | 0      |
| CD4 T cells       | 0       | 0.4878 | 0.094  | 0        | 1.495   | 0       | 0      |
| Lymphocytes       | 0.00827 | 0.3345 | 2.73   | 0.3846   | 0.3045  | 0.1482  | 2.84   |
| Granulocytes      | 0.03778 | 4.254  | 1.114  | 0.288    | 0.315   | 0.1182  | 0.7847 |

Figure S6

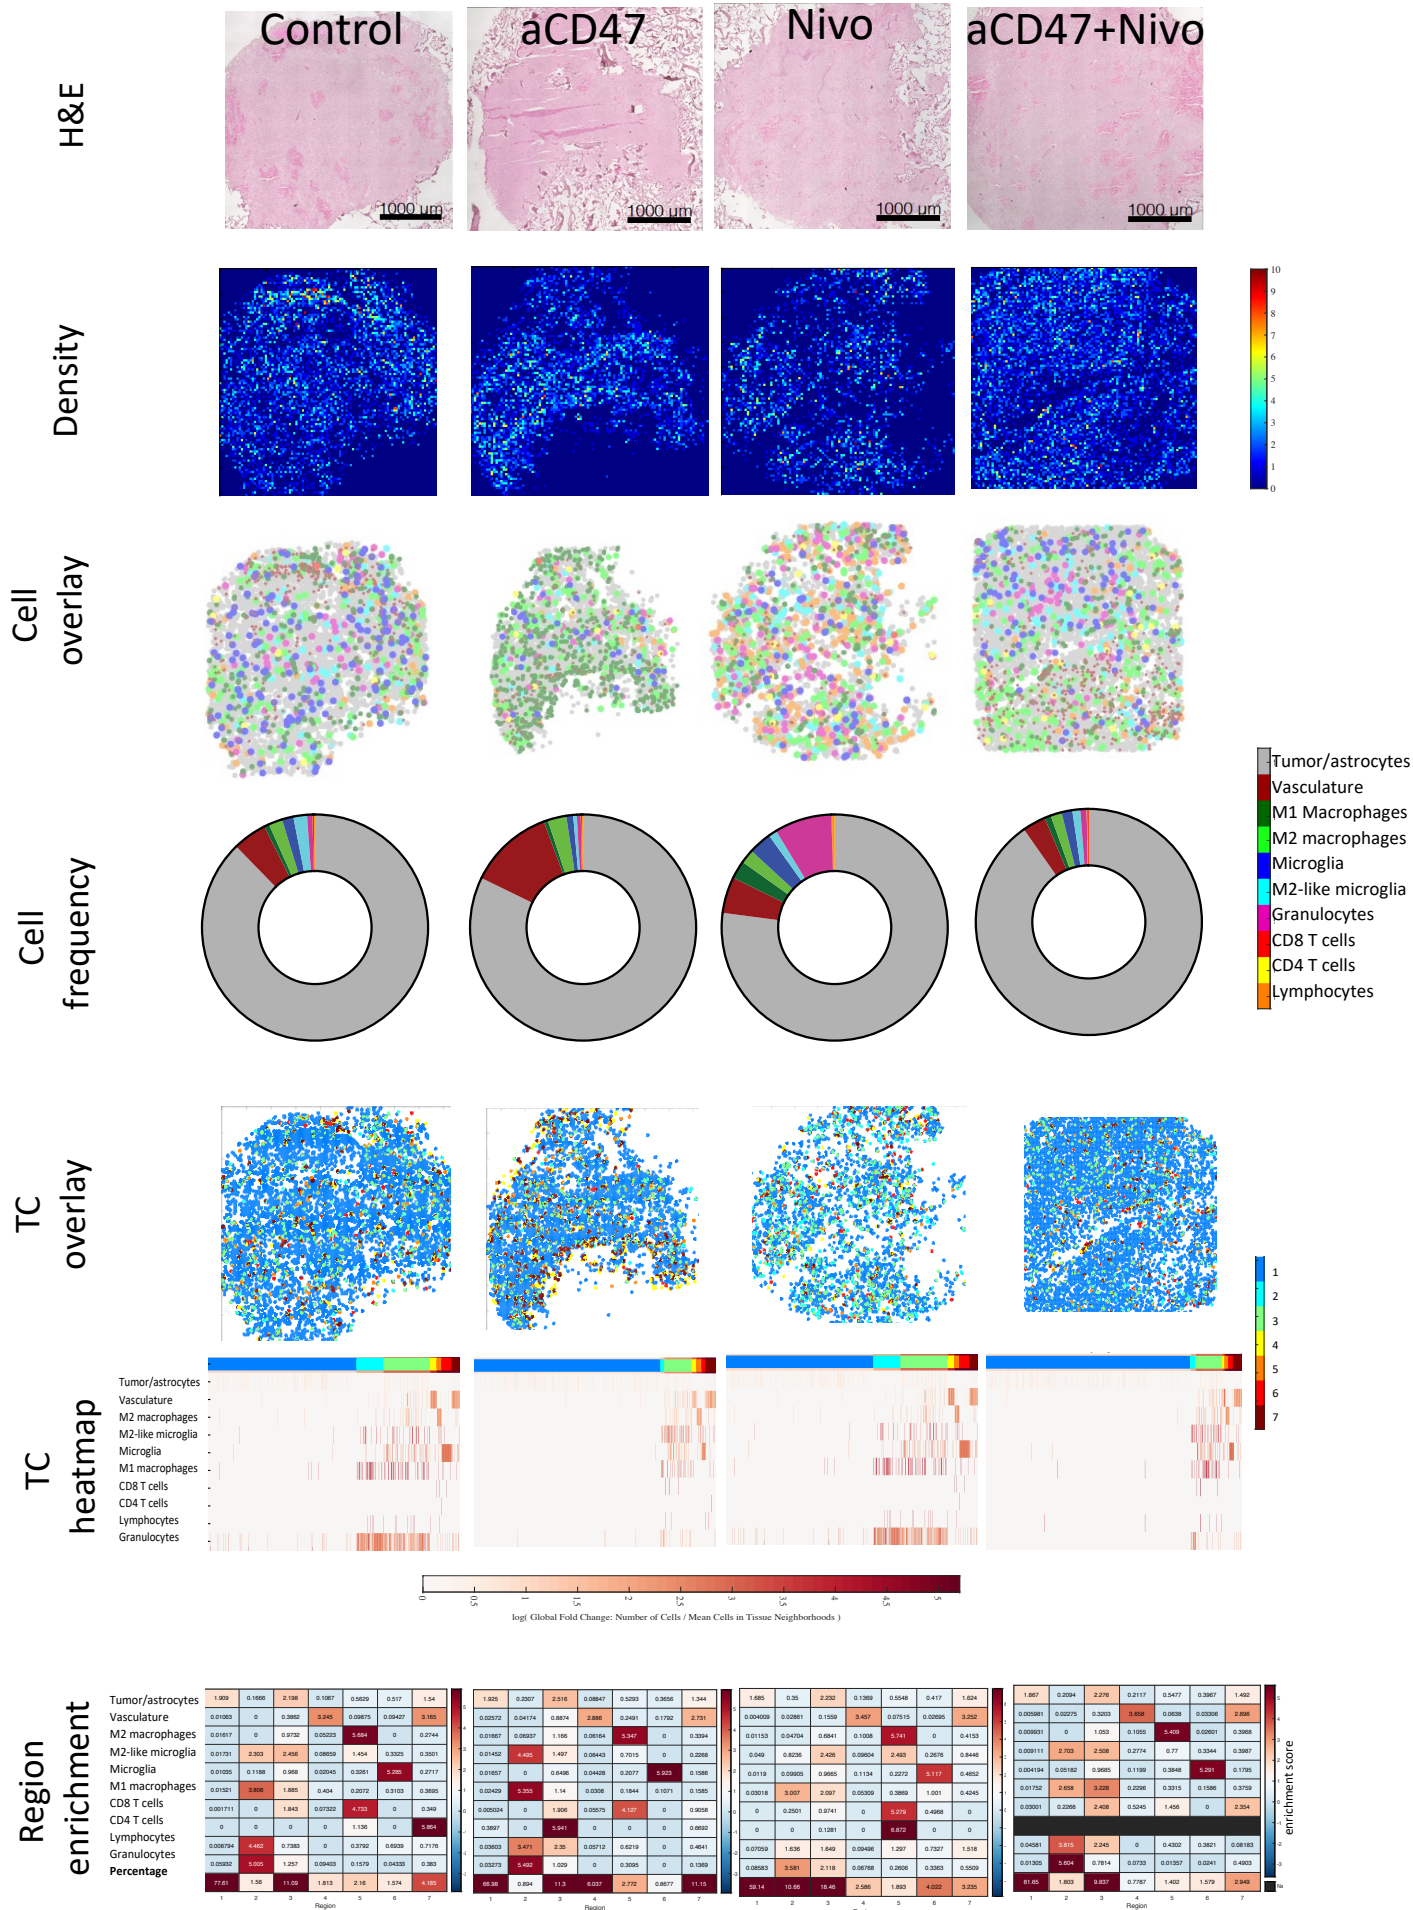

Figure S6

580 c

Age: 39  
 Gender:m  
 Subtype: CL  
 MGMT +  
 OS: 651

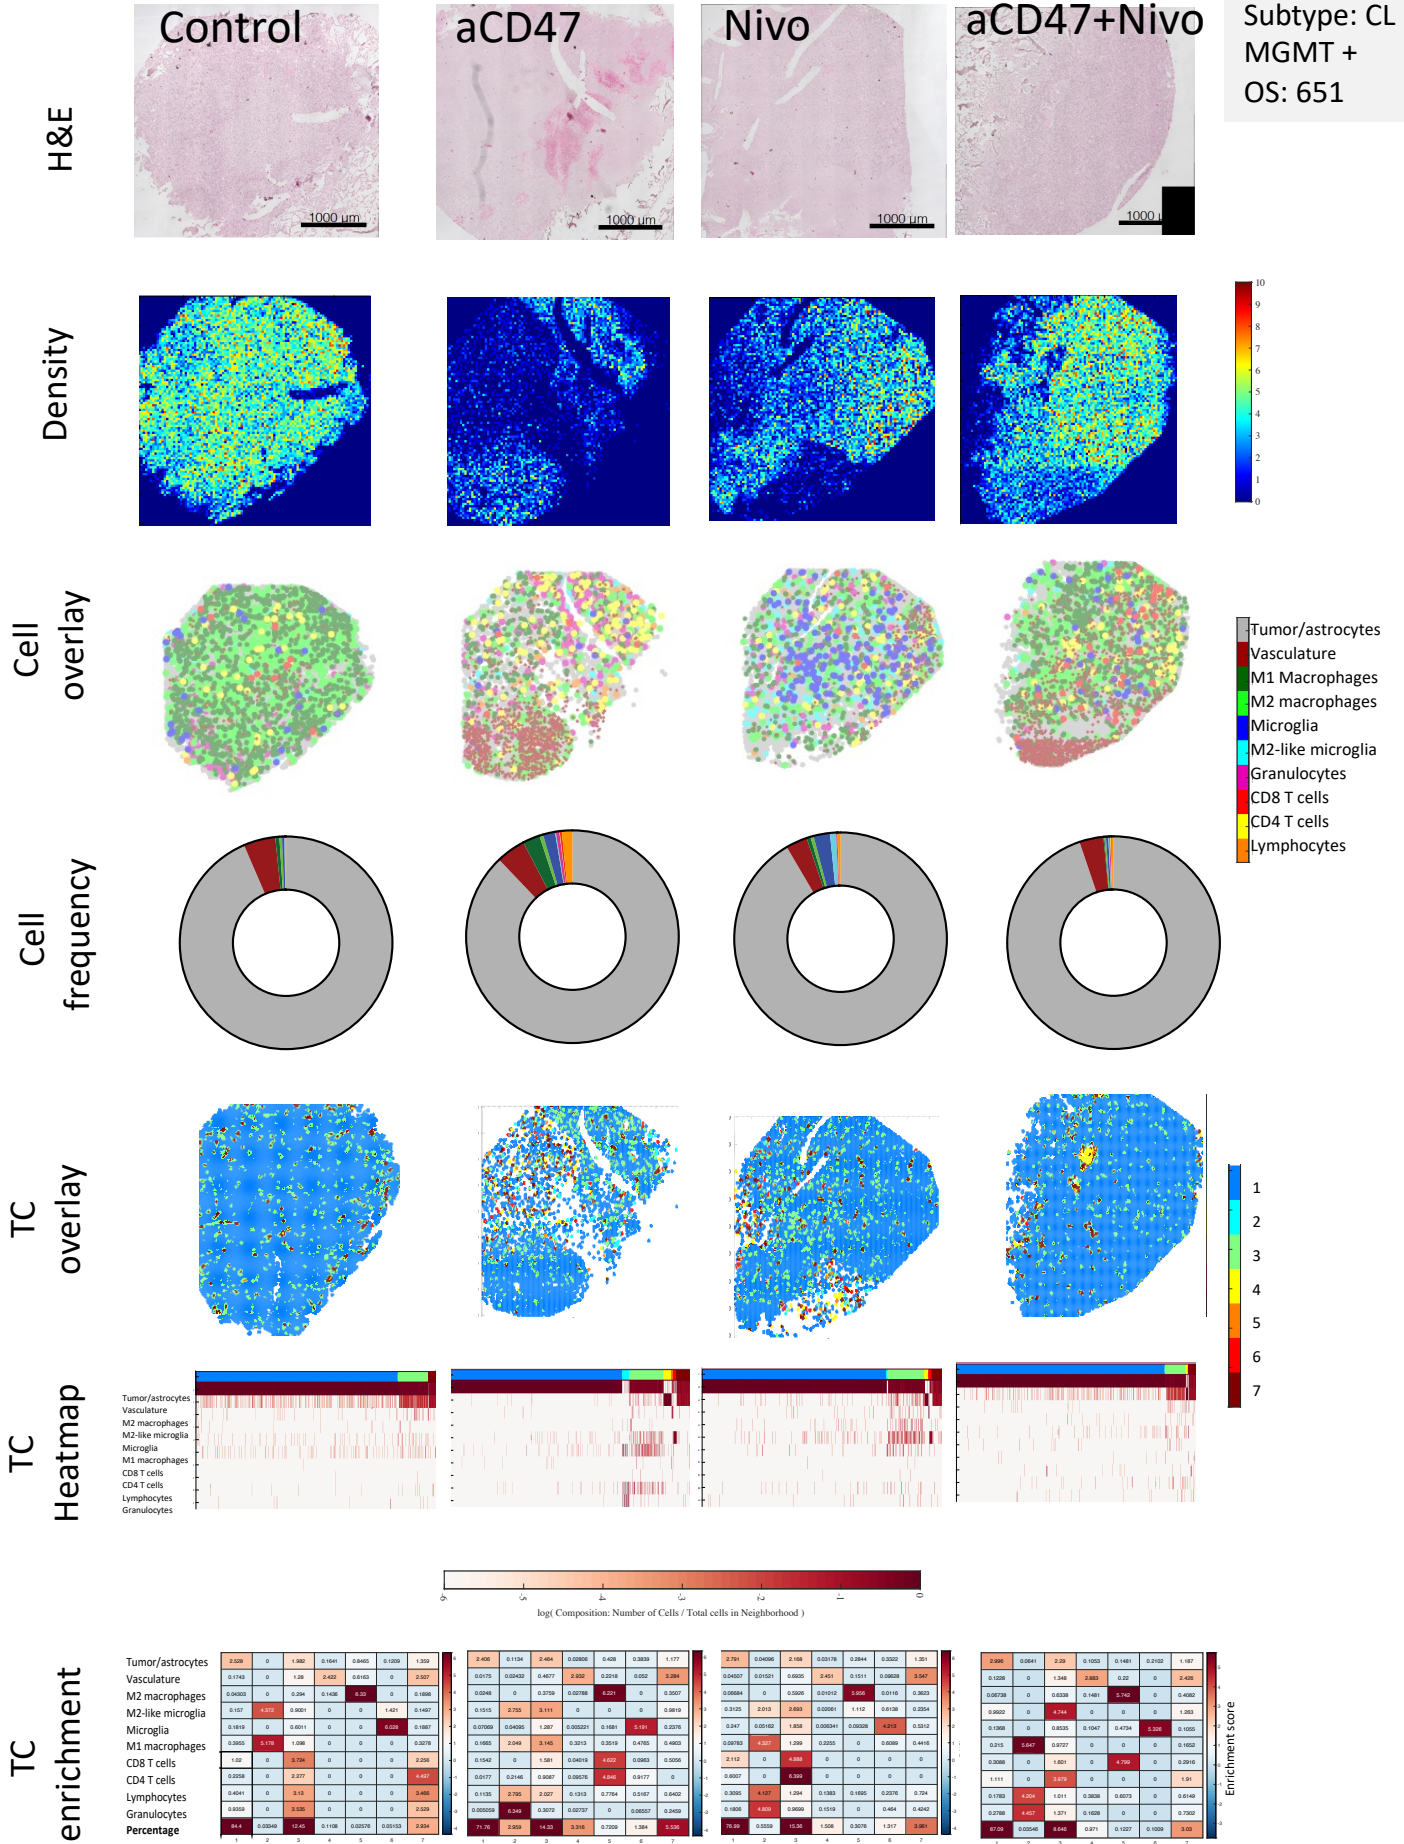

Figure S6

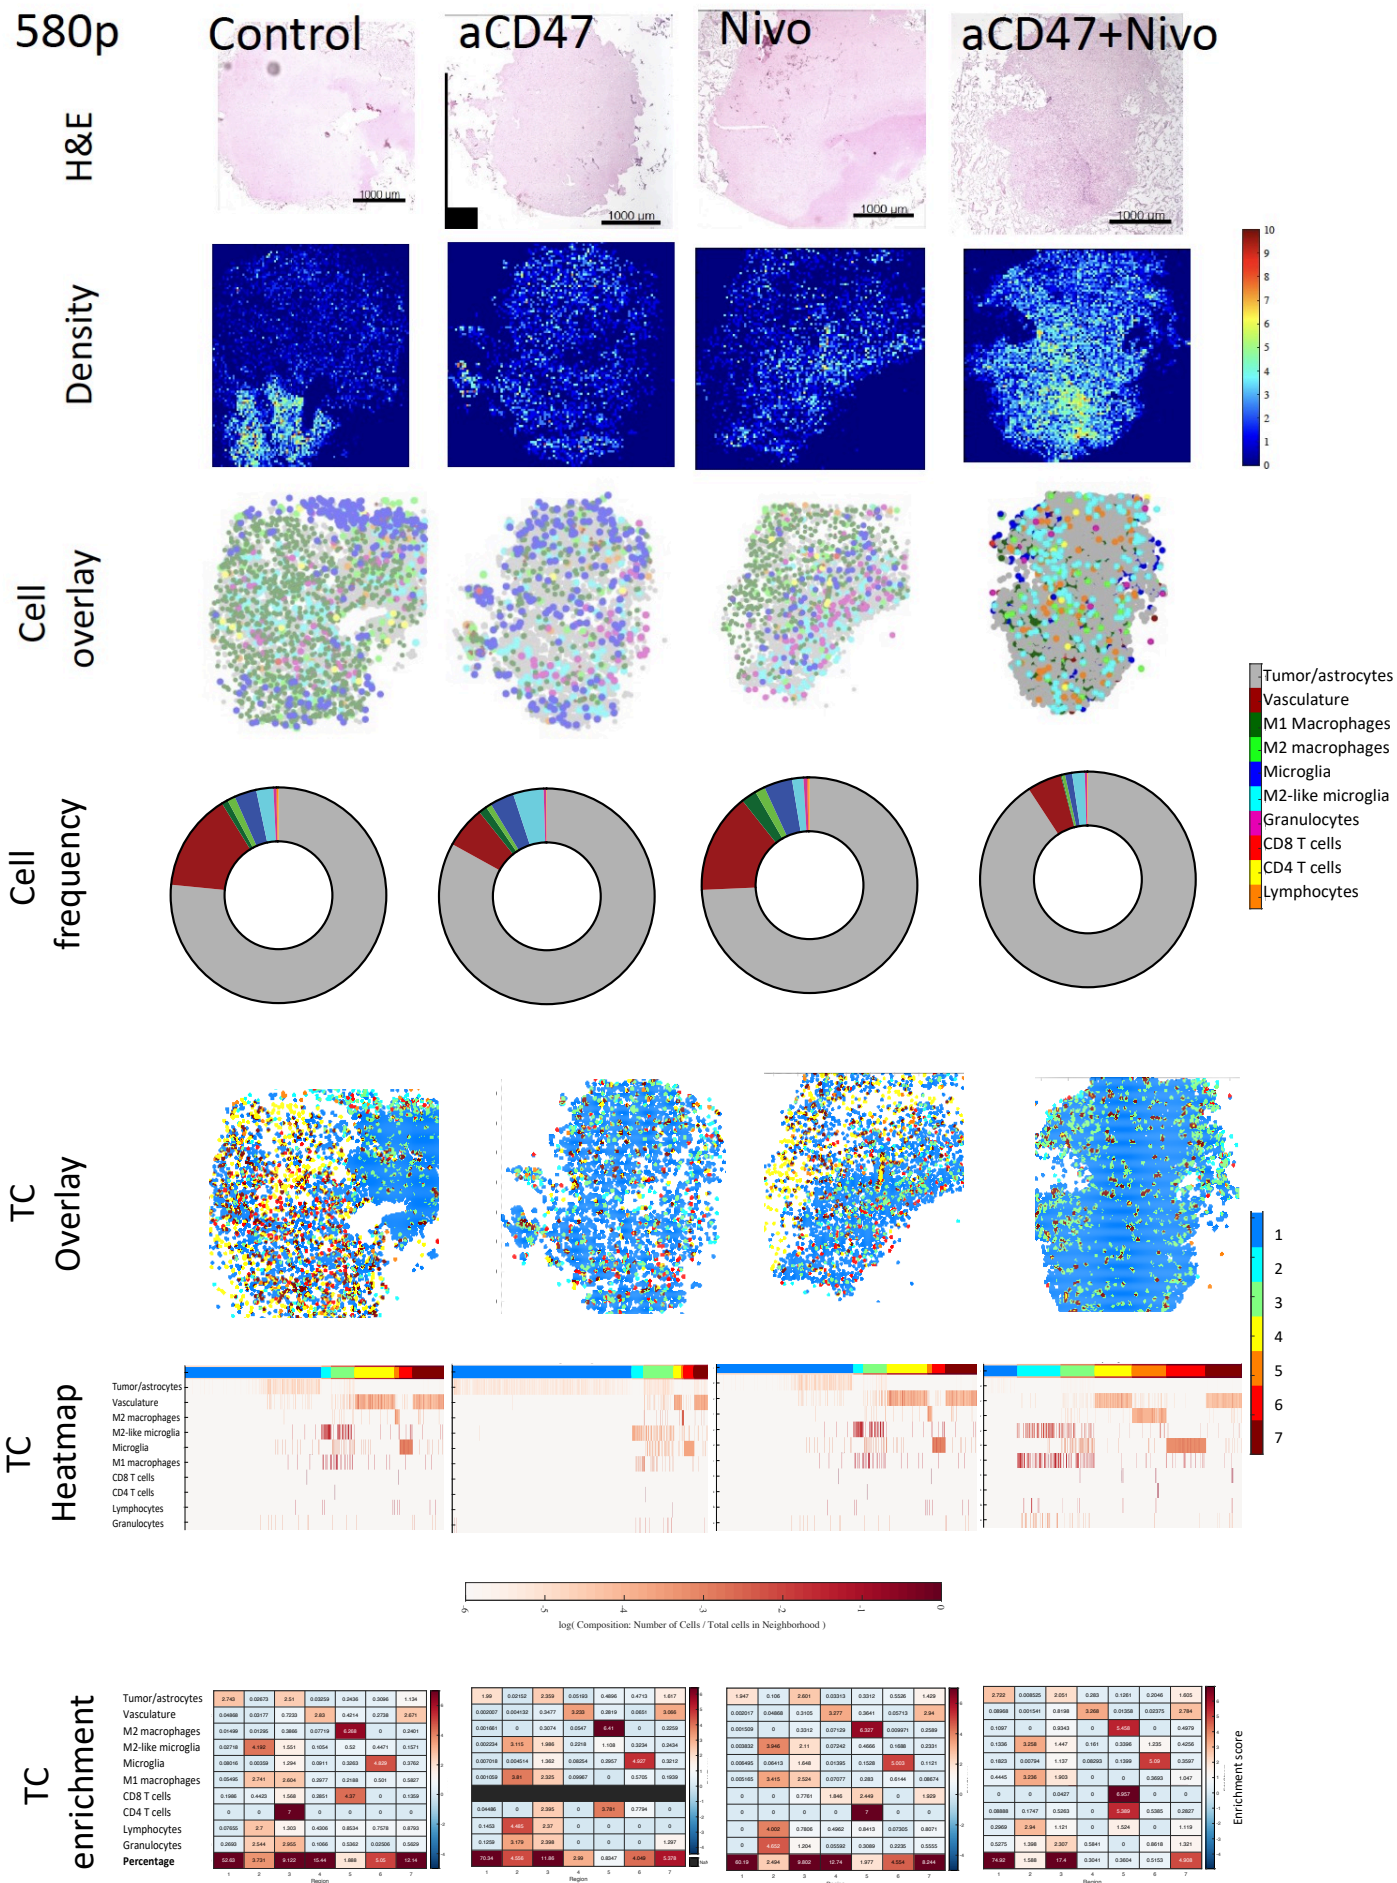

Figure S6



581c

Age: 59  
 Gender: m  
 Subtype: CL  
 MGMT +  
 OS: >700

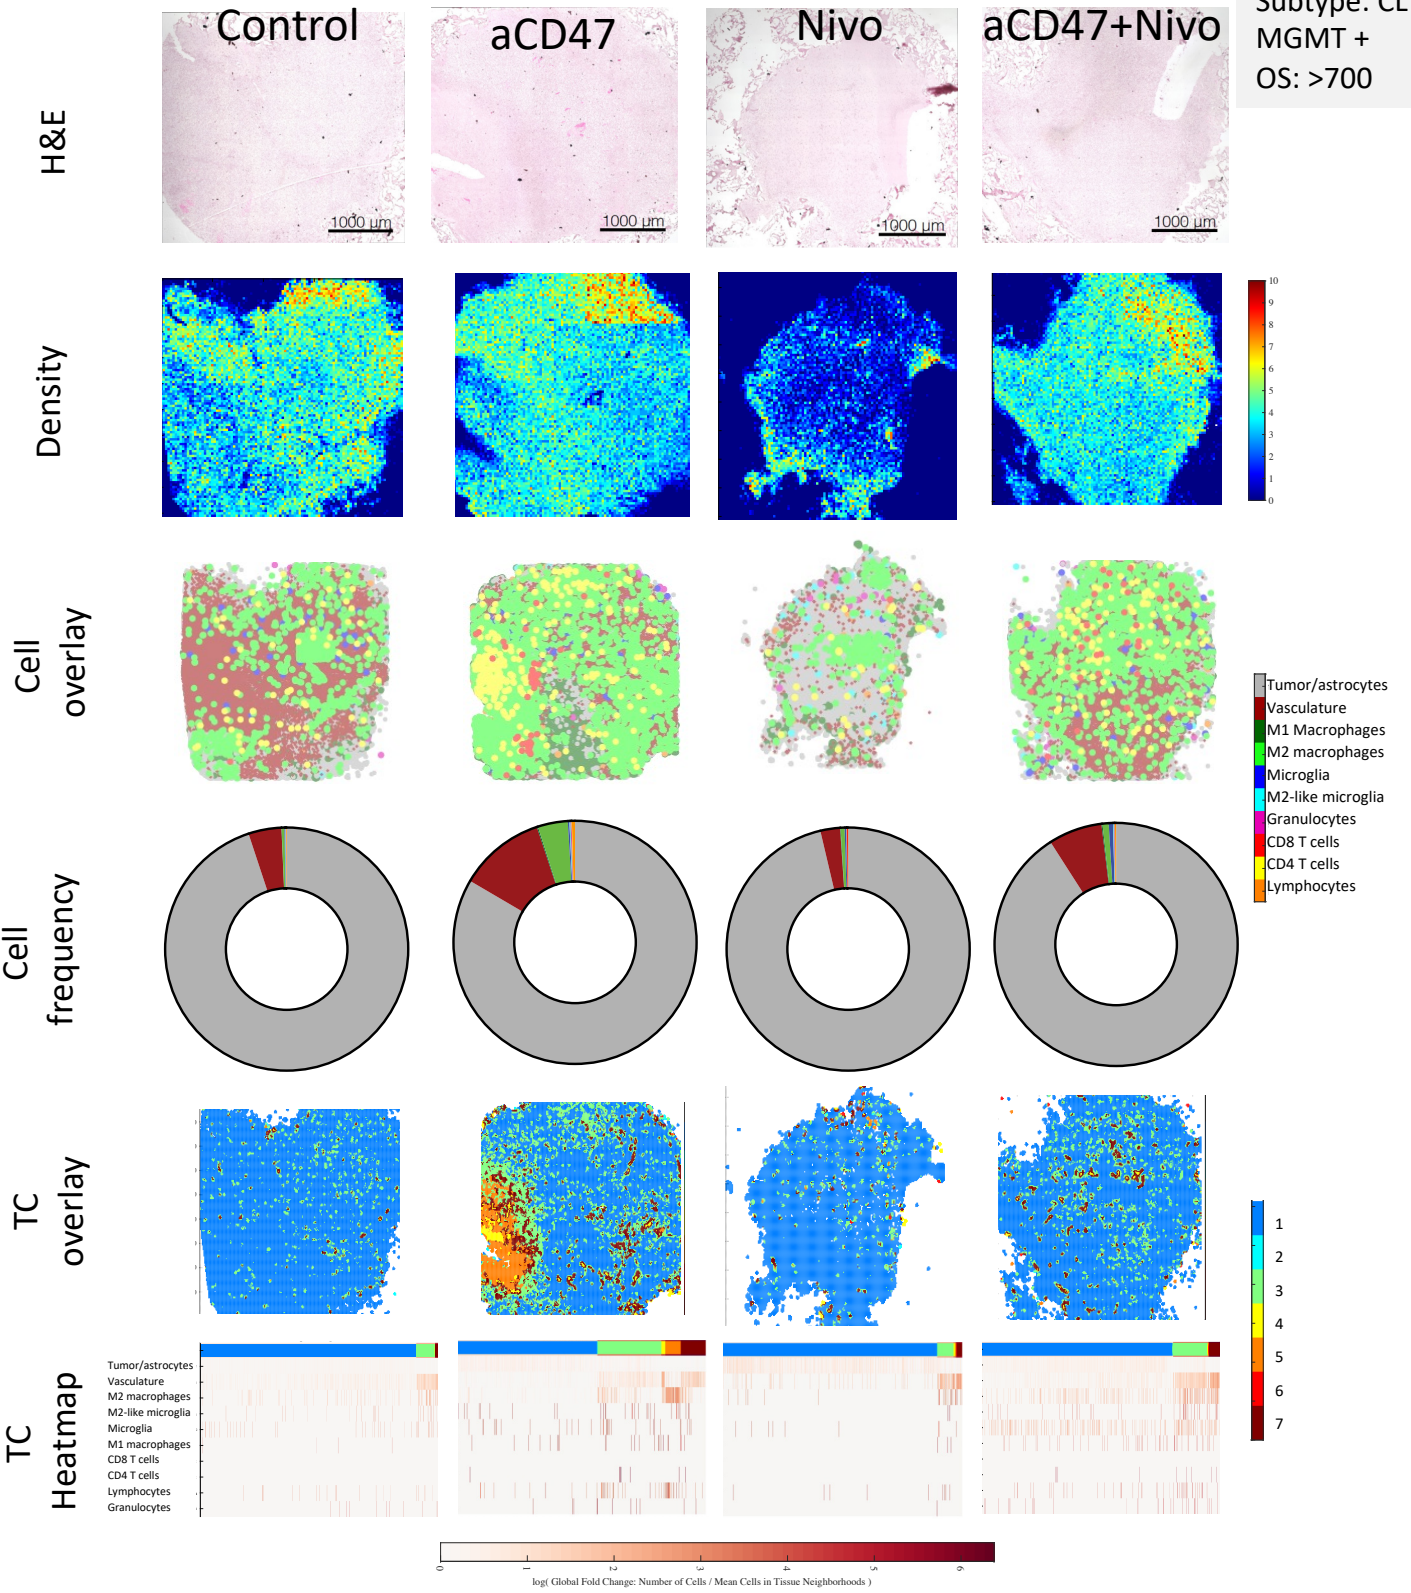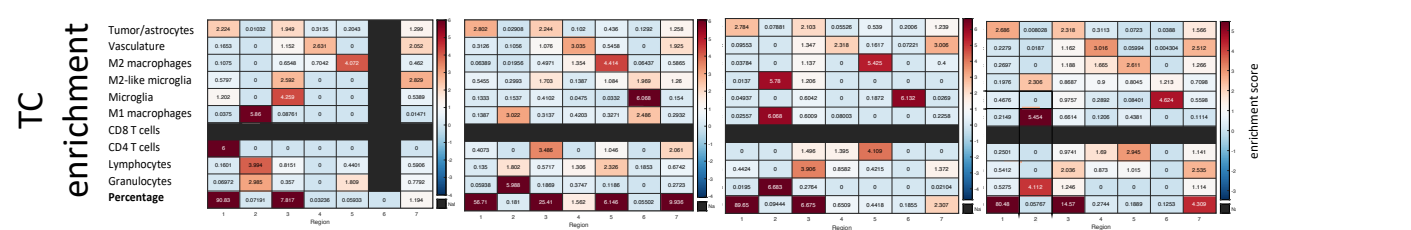

Figure S6

**583c**

Age: 71  
Gender: m  
Subtype: CL  
MGMT -  
OS: 227d

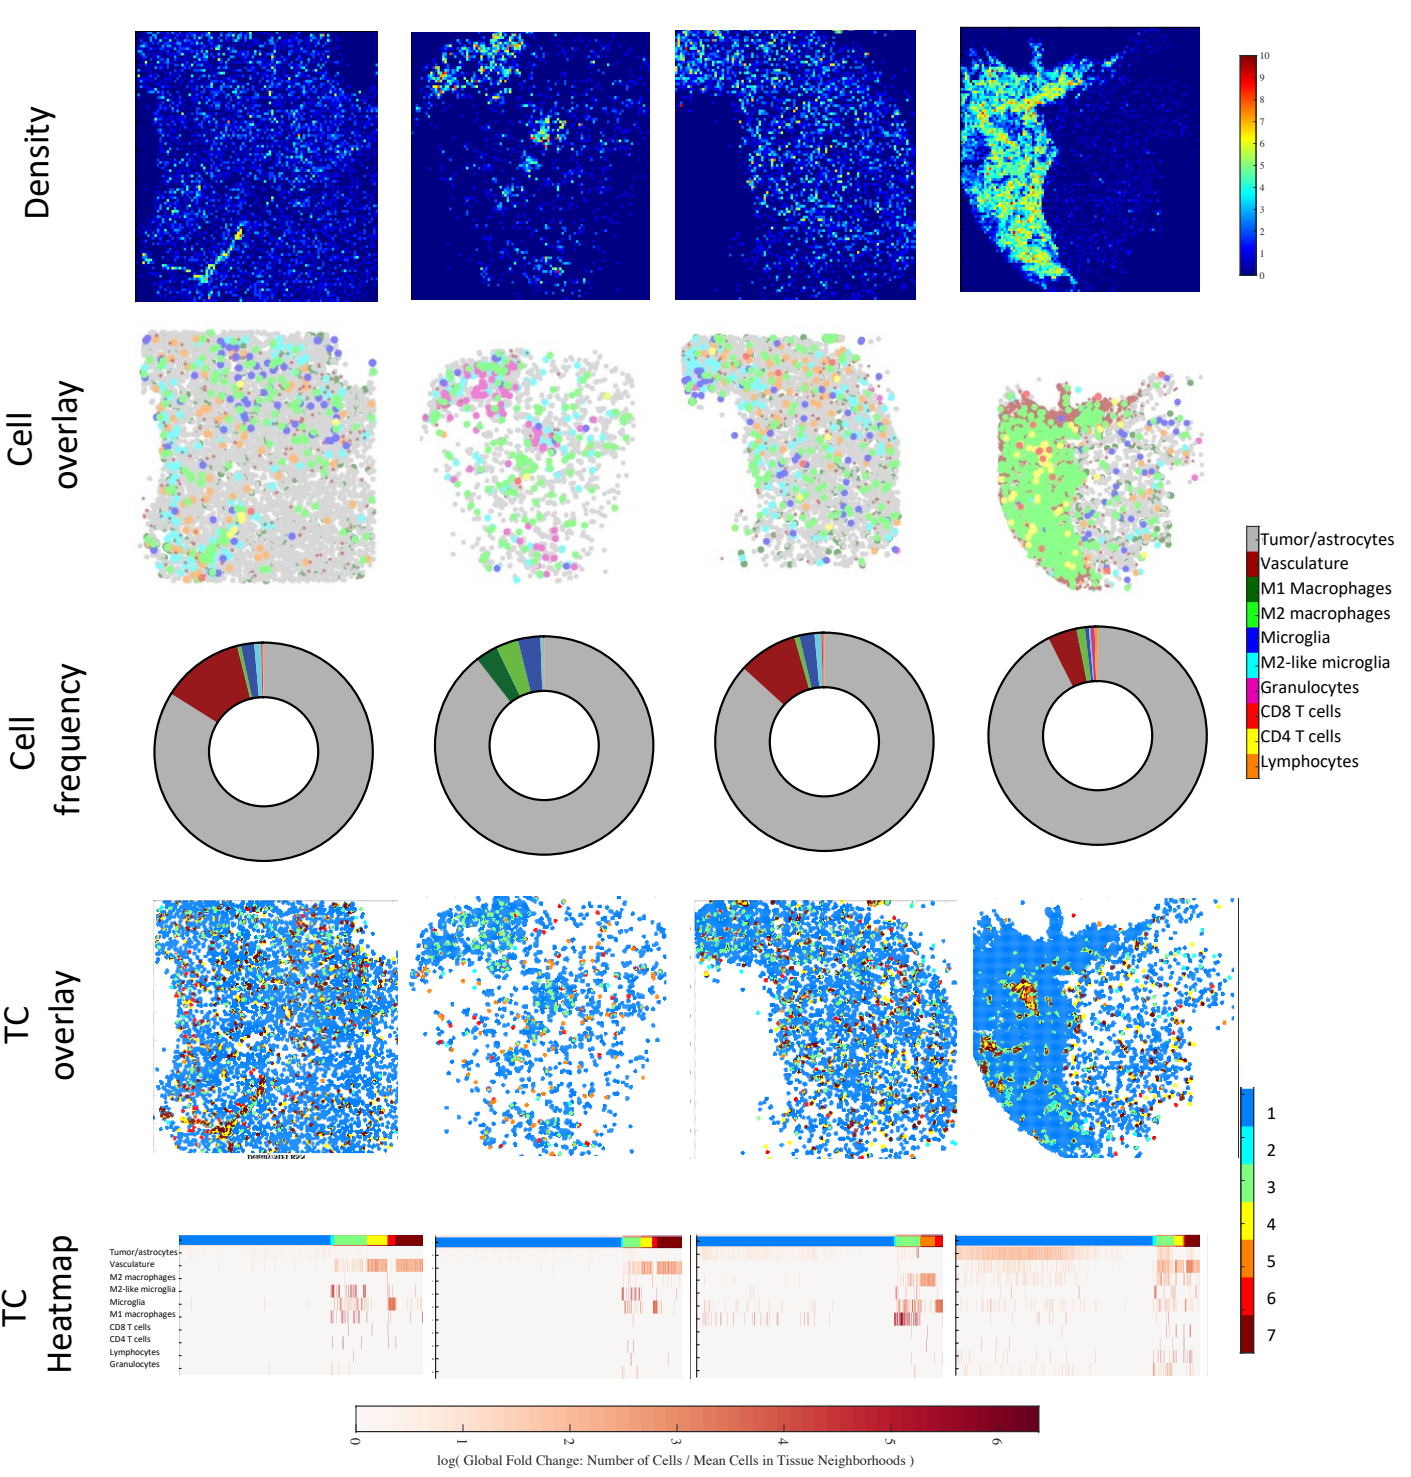

**TC enrichment**

| Cell Type         | Region 1  | Region 2 | Region 3 | Region 4 | Region 5 | Region 6 | Region 7 |
|-------------------|-----------|----------|----------|----------|----------|----------|----------|
| Tumor/astrocytes  | 1.541     | 0.1921   | 3.33     | 0.1322   | 0.8006   | 0.4768   | 1.433    |
| Vasculature       | 0.003365  | 0.1088   | 0.7271   | 3.08     | 0.322    | 0.1198   | 2.737    |
| M2 macrophages    | 0.0007603 | 0        | 0.2089   | 0.116    | 6.43     | 0.01291  | 0.2014   |
| M2-like microglia | 0.0000004 | 0.044    | 1.488    | 0.07863  | 0.1808   | 0.05529  | 0.1681   |
| Microglia         | 0.001793  | 0.0183   | 1.104    | 0.05457  | 0.4148   | 0.172    | 0.2355   |
| M1 macrophages    | 0.007081  | 3.488    | 2.743    | 0.1474   | 0        | 0.2813   | 0.3732   |
| CD8 T cells       | 0         | 0        | 2.787    | 0        | 4.214    | 0        | 0        |
| CD4 T cells       | 0.01111   | 2.24     | 1.512    | 0.8284   | 0        | 0        | 0.838    |
| Lymphocytes       | 0.001499  | 0.38     | 0.3652   | 0.276    | 0        | 0.1328   | 0.1281   |
| Granulocytes      | 0.001793  | 0.0183   | 1.104    | 0.05457  | 0.4148   | 0.172    | 0.2355   |
| Percentage        | 75.26     | 0.8172   | 7.24     | 4.07     | 0.191    | 1.838    | 9.88     |

  

| Cell Type         | Region 1 | Region 2 | Region 3 | Region 4 | Region 5 | Region 6 | Region 7 |
|-------------------|----------|----------|----------|----------|----------|----------|----------|
| Tumor/astrocytes  | 0.211    | 0        | 2.843    | 0        | 0.2547   | 0.3408   | 1.351    |
| Vasculature       | 0.003548 | 0        | 0.04854  | 3.475    | 0        | 0        | 3.475    |
| M2 macrophages    | 0.02464  | 0        | 1.249    | 0        | 1.263    | 0.02276  | 0        |
| M2-like microglia | 0.03607  | 4.261    | 1.189    | 0        | 0.2649   | 0.5175   | 0        |
| Microglia         | 0.07166  | 0        | 1.819    | 0        | 0.4058   | 4.704    | 0        |
| M1 macrophages    | 0.039    | 1.816    | 1.312    | 1.884    | 0.02038  | 0.02551  | 1.884    |
| CD8 T cells       | 0        | 0        | 0.3156   | 0        | 4.964    | 0        | 0        |
| CD4 T cells       | 0        | 0        | 0        | 0        | 7        | 0        | 0        |
| Lymphocytes       | 0        | 1.34     | 1.732    | 0        | 2.773    | 0.8948   | 0        |
| Granulocytes      | 0.2376   | 0        | 0.740    | 0        | 0        | 0        | 0        |
| Percentage        | 45.8     | 0.8791   | 3.711    | 0.05178  | 1.262    | 3.252    | 0.01236  |

  

| Cell Type         | Region 1  | Region 2 | Region 3 | Region 4 | Region 5 | Region 6 | Region 7 |
|-------------------|-----------|----------|----------|----------|----------|----------|----------|
| Tumor/astrocytes  | 1.81      | 0.07883  | 2.551    | 0.05145  | 0.8291   | 0.4584   | 1.411    |
| Vasculature       | 0.000686  | 0.008253 | 0.7652   | 2.844    | 0.4855   | 0.1216   | 0.732    |
| M2 macrophages    | 0.0012584 | 0        | 0.3171   | 0.1021   | 0.258    | 0        | 0.3325   |
| M2-like microglia | 0.007054  | 4.28     | 1.293    | 0.02036  | 1.064    | 0.04484  | 0.1739   |
| Microglia         | 0.01654   | 0.07583  | 1.241    | 0.02086  | 0.1219   | 2.228    | 0.2841   |
| M1 macrophages    | 0         | 0.659    | 0.3095   | 0        | 0        | 0        | 0        |
| CD8 T cells       | 0.008272  | 0        | 1.864    | 0.3558   | 3.782    | 0        | 0.8816   |
| CD4 T cells       | 0.01163   | 0        | 0.8954   | 0        | 1.41     | 0        | 0.2831   |
| Lymphocytes       | 0.06191   | 3.248    | 2.212    | 0.7659   | 0        | 0        | 0.8649   |
| Granulocytes      | 0.00987   | 0.185    | 0.3884   | 0.01881  | 0        | 0.366    | 0.3195   |
| Percentage        | 33.99     | 1.205    | 7.025    | 3.814    | 0.5043   | 3.474    | 1.01     |

  

| Cell Type         | Region 1 | Region 2 | Region 3 | Region 4 | Region 5 | Region 6 | Region 7 |
|-------------------|----------|----------|----------|----------|----------|----------|----------|
| Tumor/astrocytes  | 2.97     | 0.1828   | 2.334    | 0.00205  | 0.2014   | 0.111    | 0.9483   |
| Vasculature       | 0.1258   | 0.0987   | 1.331    | 0.111    | 0.5997   | 0        | 2.739    |
| M2 macrophages    | 0.1871   | 0.08972  | 1.371    | 0.3376   | 4.256    | 0.01869  | 0.7614   |
| M2-like microglia | 0.00501  | 0.165    | 1.238    | 0.05705  | 0        | 0        | 0.4543   |
| Microglia         | 0.1528   | 0.3425   | 1.184    | 0.04011  | 0.3508   | 4.154    | 0.2089   |
| M1 macrophages    | 0.0687   | 3.7      | 2.284    | 0        | 0        | 0        | 0.1889   |
| CD8 T cells       | 0.00664  | 0.08653  | 0.3645   | 0.4688   | 3.219    | 0        | 0.8376   |
| CD4 T cells       | 0.04588  | 0.1385   | 0.3097   | 0.1291   | 0.544    | 0        | 0.3184   |
| Lymphocytes       | 0.06891  | 0.3894   | 0.9693   | 0.37     | 4.58     | 0.2084   | 0.8033   |
| Granulocytes      | 0.03913  | 0.014    | 1.25     | 0.032    | 0.3622   | 0.07738  | 0.2437   |
| Percentage        | 81.97    | 1.205    | 7.025    | 3.814    | 0.5043   | 3.474    | 1.01     |

**Figure S6**

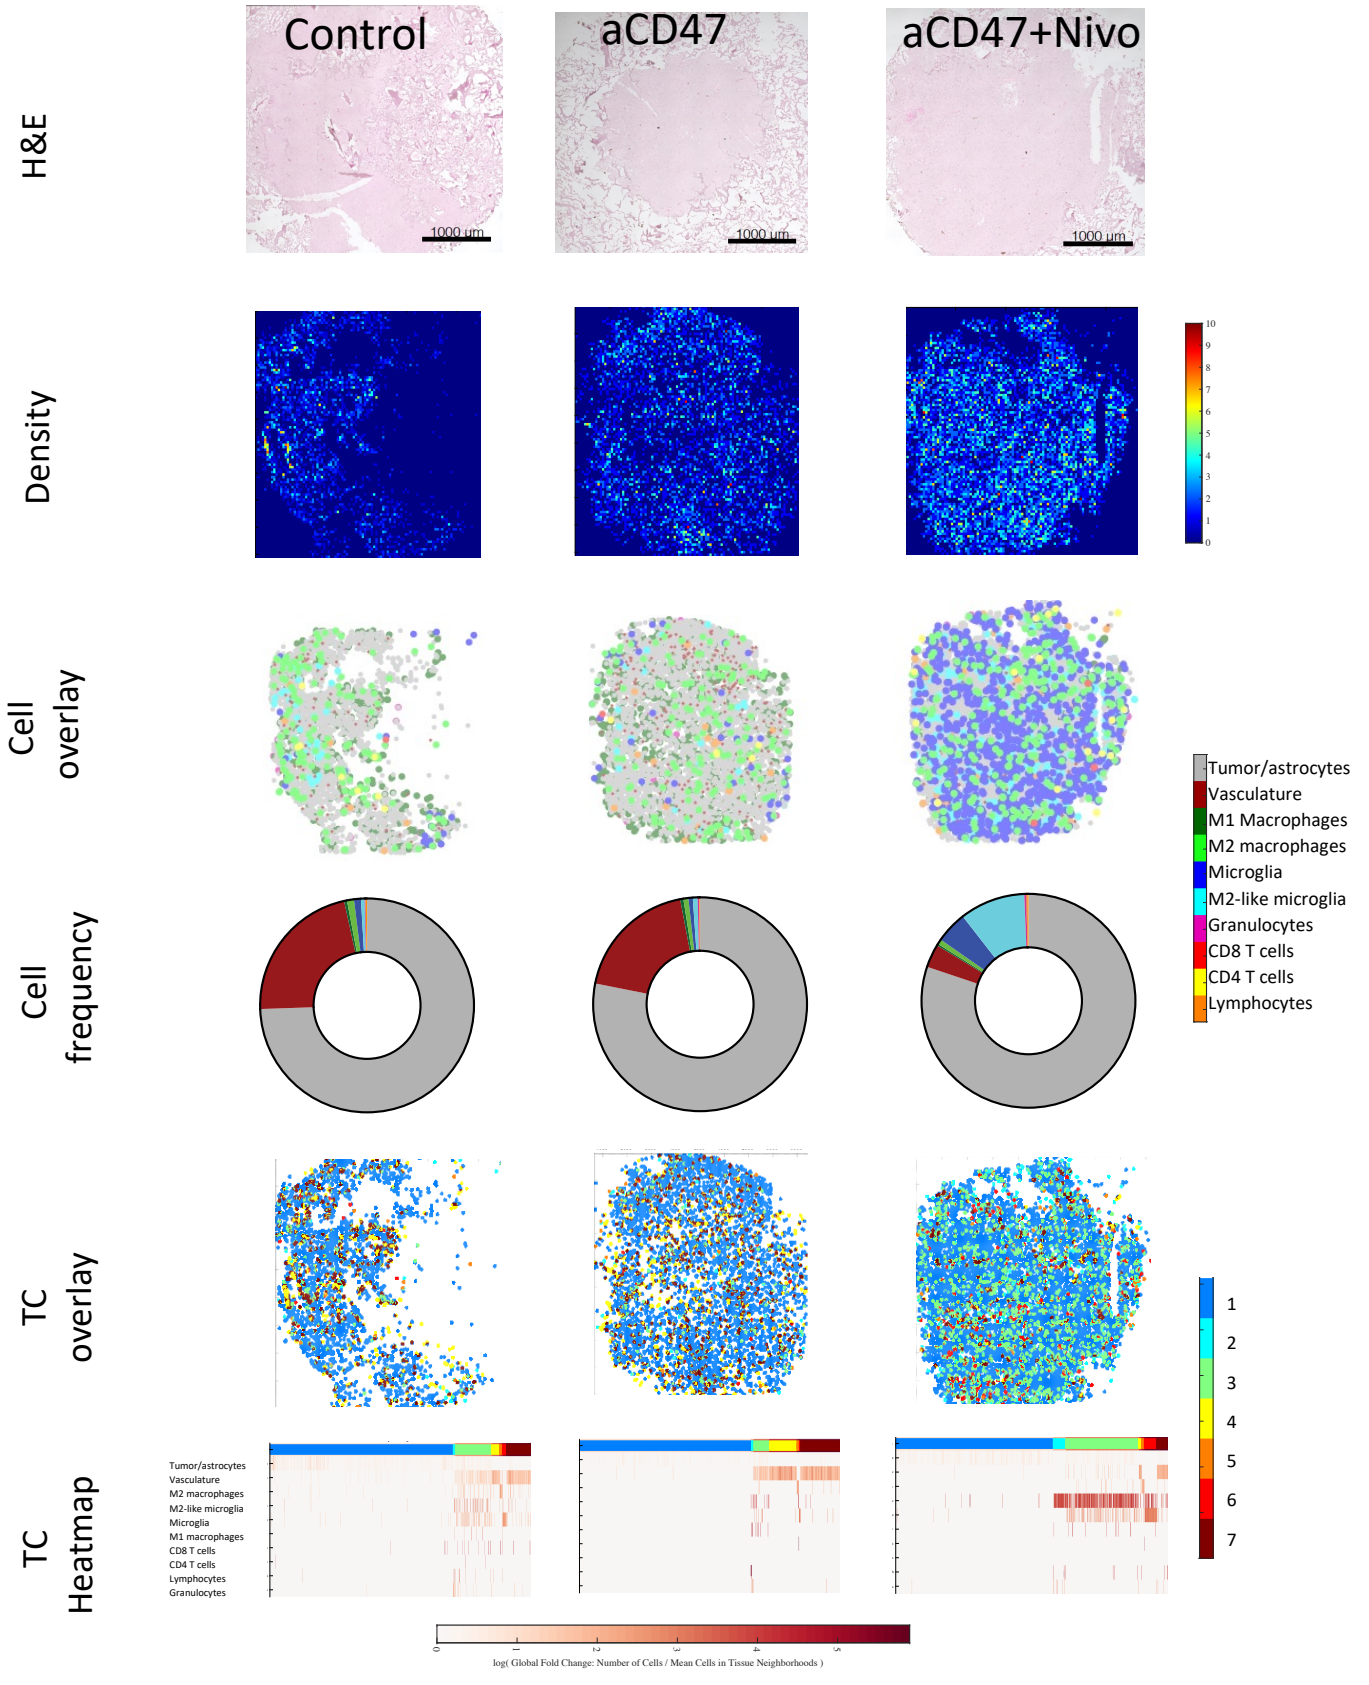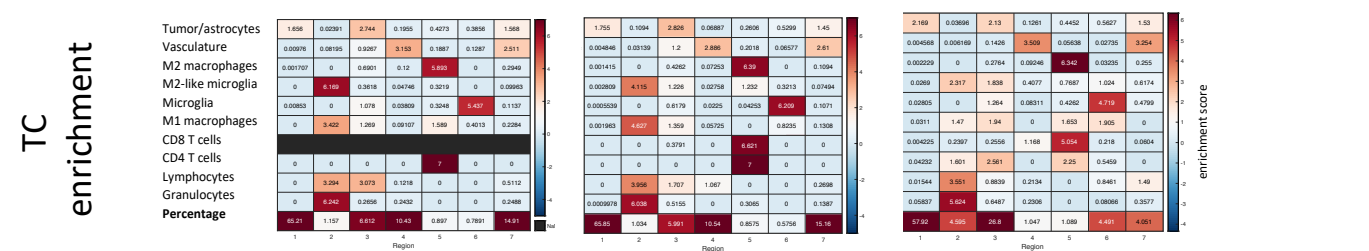

Figure S6

587c

Age: 69  
 Gender: f  
 Subtype: MES  
 MGMT -  
 OS: 470d

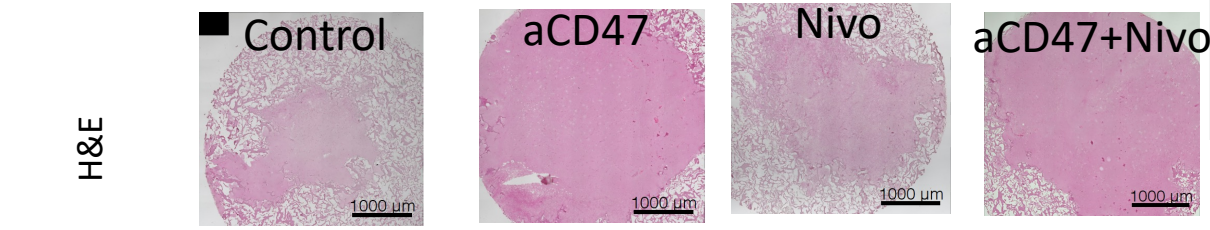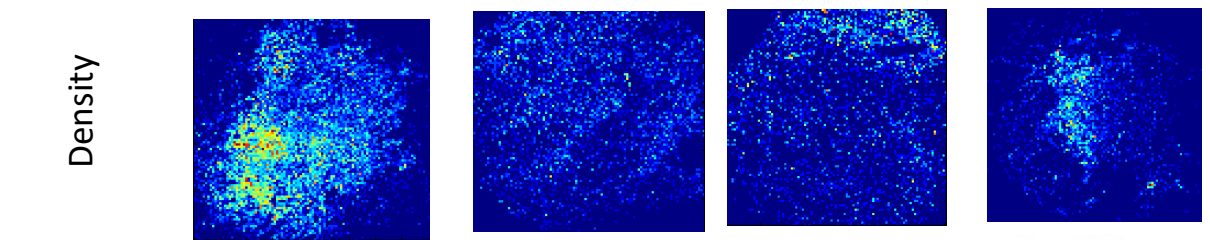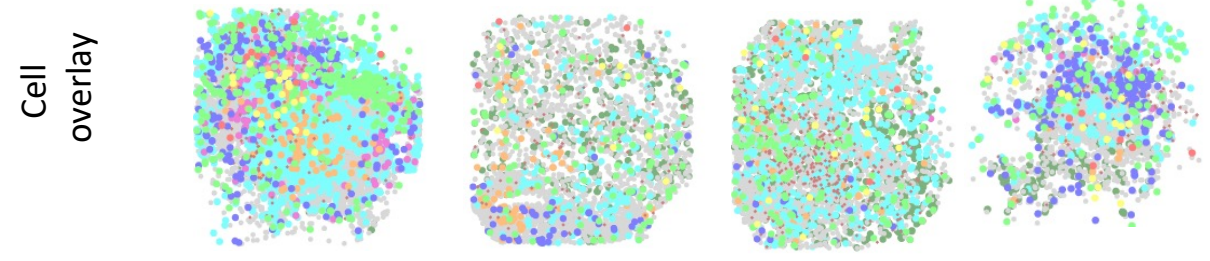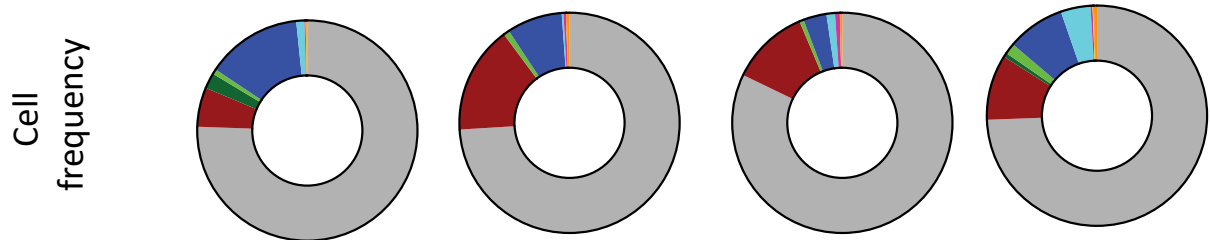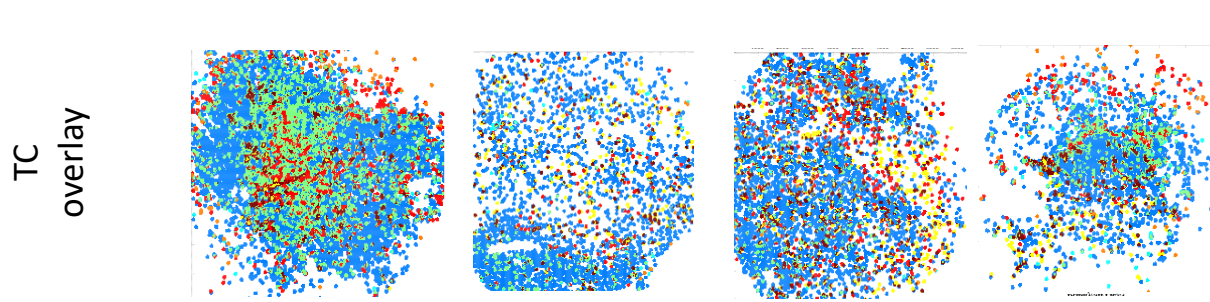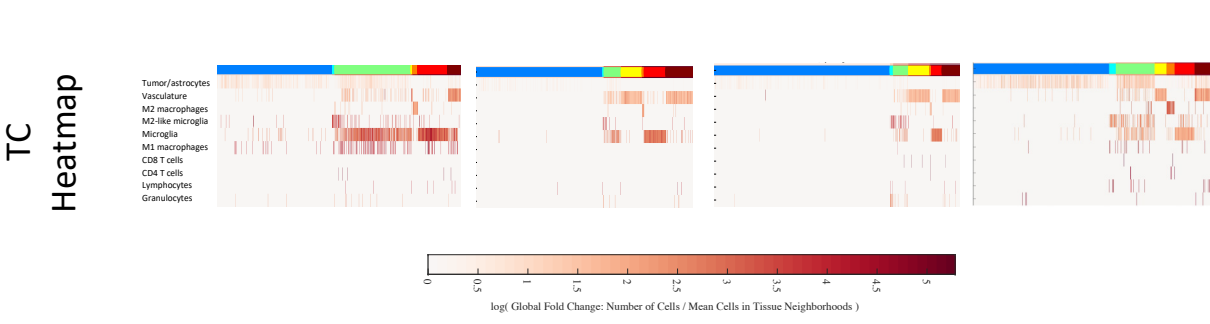

log<sub>2</sub> (Global Fold Change: Number of Cells / Mean Cells in Tissue Neighborhoods)

|                   | 1       | 2       | 3      | 4      | 5       | 6      | 7       |
|-------------------|---------|---------|--------|--------|---------|--------|---------|
| Tumor/astrocytes  | 1.078   | 0.00703 | 2.294  | 0.2750 | 0.1146  | 0.0017 | 1.44    |
| Vasculature       | 0.00004 | 0       | 0.0000 | 0.0729 | 0.00001 | 0.108  | 0.2762  |
| M2 macrophages    | 0.00109 | 0.00162 | 0.0001 | 0.0072 | 0.24    | 0.1072 | 0.00162 |
| M2-like microglia | 0.00405 | 0.04405 | 1.691  | 0.6541 | 0.3152  | 0.3403 | 0.6503  |
| M1 macrophages    | 0.1905  | 1.802   | 2.007  | 0.571  | 0.00009 | 0.0458 | 1.241   |
| CD8 T cells       | 0       | 1.541   | 1.553  | 0.361  | 0       | 0.2662 | 0       |
| CD4 T cells       | 0.00044 | 1.309   | 0.7099 | 1.565  | 0.2769  | 0.4021 | 0.612   |
| Lymphocytes       | 0.0214  | 2.814   | 2.171  | 0      | 0.1918  | 0.0815 | 1.082   |
| Granulocytes      | -46.45  | 0.965   | 10.64  | 0.0548 | 0.108   | 0.1024 | 0.102   |
| Percentage        | 16.73   | 0.5885  | 7.803  | 0.507  | 0.0488  | 0.602  | 12.10   |

  

|                   | 1         | 2       | 3      | 4       | 5      | 6       | 7      |
|-------------------|-----------|---------|--------|---------|--------|---------|--------|
| Tumor/astrocytes  | 1.787     | 0.00291 | 2.716  | 0.07059 | 0.1802 | 0.2049  | 1.701  |
| Vasculature       | 0.000176  | 0.01005 | 0.0023 | 0.219   | 0.0001 | 0.1711  | 2.02   |
| M2 macrophages    | 0.000012  | 0.01009 | 0.0279 | 0.1029  | 0.402  | 0       | 0.1229 |
| M2-like microglia | 0.000016  | 3.475   | 2.485  | 0.0105  | 0.7051 | 0.126   | 0.1815 |
| Microglia         | 0.000027  | 0.1103  | 1.197  | 0.04426 | 0.0219 | 5.181   | 0.2774 |
| M1 macrophages    | 0         | 0       | 0.4005 | 0.3818  | 5.477  | 0       | 0.6004 |
| CD8 T cells       | 0         | 0       | 0.8363 | 0       | 0.004  | 0.00001 | 1.385  |
| CD4 T cells       | 0.0000214 | 1.687   | 0.0021 | 0.041   | 0.2118 | 0.04006 | 0.2027 |
| Lymphocytes       | 16.74     | 2.708   | 16.2   | 4.919   | 3.401  | 8.208   | 7.61   |

enrichment score

Figure S6

588c

Age: 78  
 Gender: f  
 Subtype: MES  
 MGMT +  
 OS: 204d

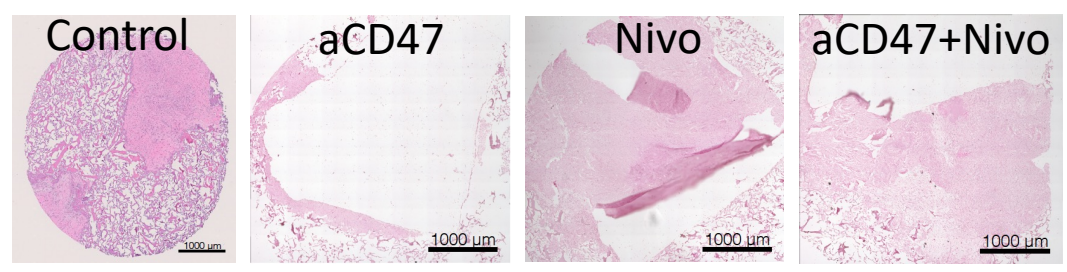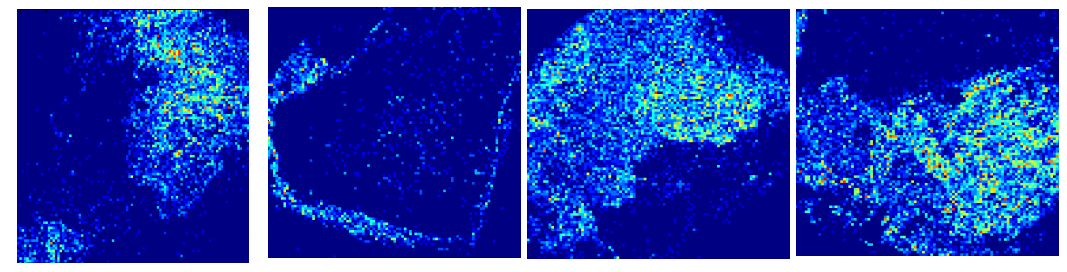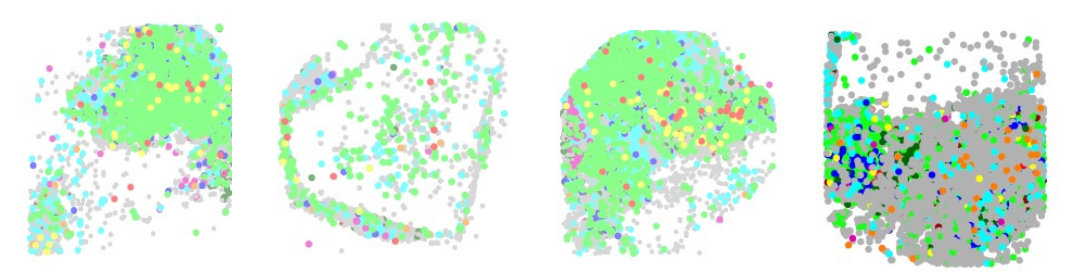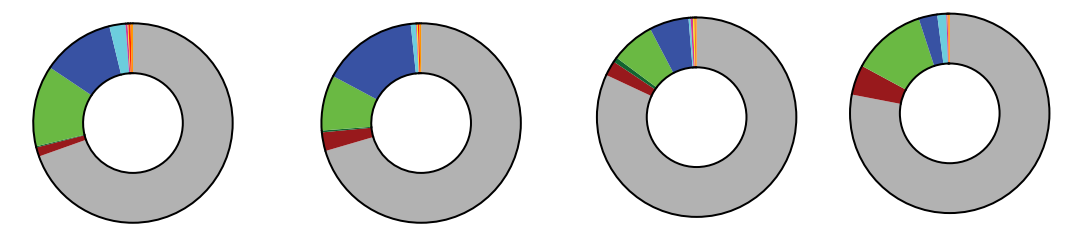

- Tumor/astrocytes
- Vasculature
- M1 Macrophages
- M2 macrophages
- Microglia
- M2-like microglia
- Granulocytes
- CD8 T cells
- CD4 T cells
- Lymphocytes

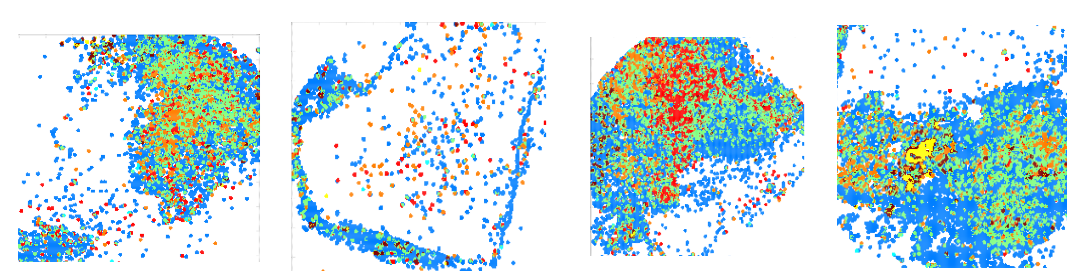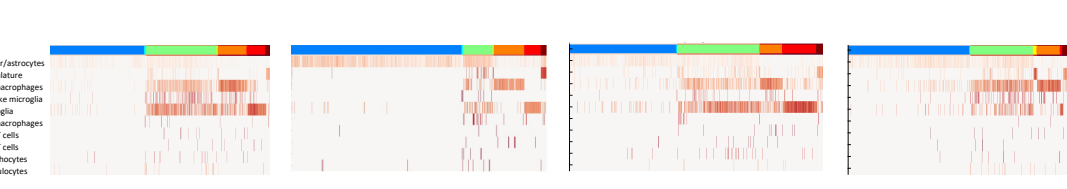

log<sub>2</sub> Global Fold Change: Number of Cells / Mean Cells in Tissue Neighborhoods

TC enrichment

|                   | 1        | 2       | 3      | 4       | 5       | 6       | 7       |
|-------------------|----------|---------|--------|---------|---------|---------|---------|
| Tumor/astrocytes  | 1.555    | 0.114   | 2.261  | 0.03379 | 0.8893  | 0.6333  | 1.144   |
| Vasculature       | 0.008701 | 0       | 0.1780 | 1.231   | 0.00324 | 0.66320 | 2.511   |
| M2 macrophages    | 0.12709  | 0.1737  | 1.513  | 0.07150 | 1.26    | 0.4233  | 4.416   |
| M2-like microglia | 0.04697  | 3.024   | 1.285  | 0       | 1.268   | 0.4994  | 0.3807  |
| Microglia         | 0.00864  | 0.02576 | 1.812  | 0.02045 | 0.8001  | 3.729   | 0.375   |
| M1 macrophages    | 0.004649 | 1.025   | 0.4895 | 0.48175 | 0.1799  | 0.2285  | 0.3701  |
| CD8 T cells       | 0.02969  | 0.7746  | 0.015  | 1.828   | 2.281   | 0.8054  | 0.285   |
| CD4 T cells       | 0.02919  | 0       | 1.685  | 0       | 4.122   | 1.228   | 0       |
| Lymphocytes       | 0.0616   | 4.887   | 1.122  | 0       | 0.5103  | 0.6134  | 0       |
| Granulocytes      | 0.05477  | 0.261   | 0.4142 | 0       | 0.1464  | 0.1305  | 0.06787 |
| Percentage        | 44.58    | 0.8544  | 31.22  | 0.45225 | 12.81   | 8.267   | 1.241   |

Figure S6

588p

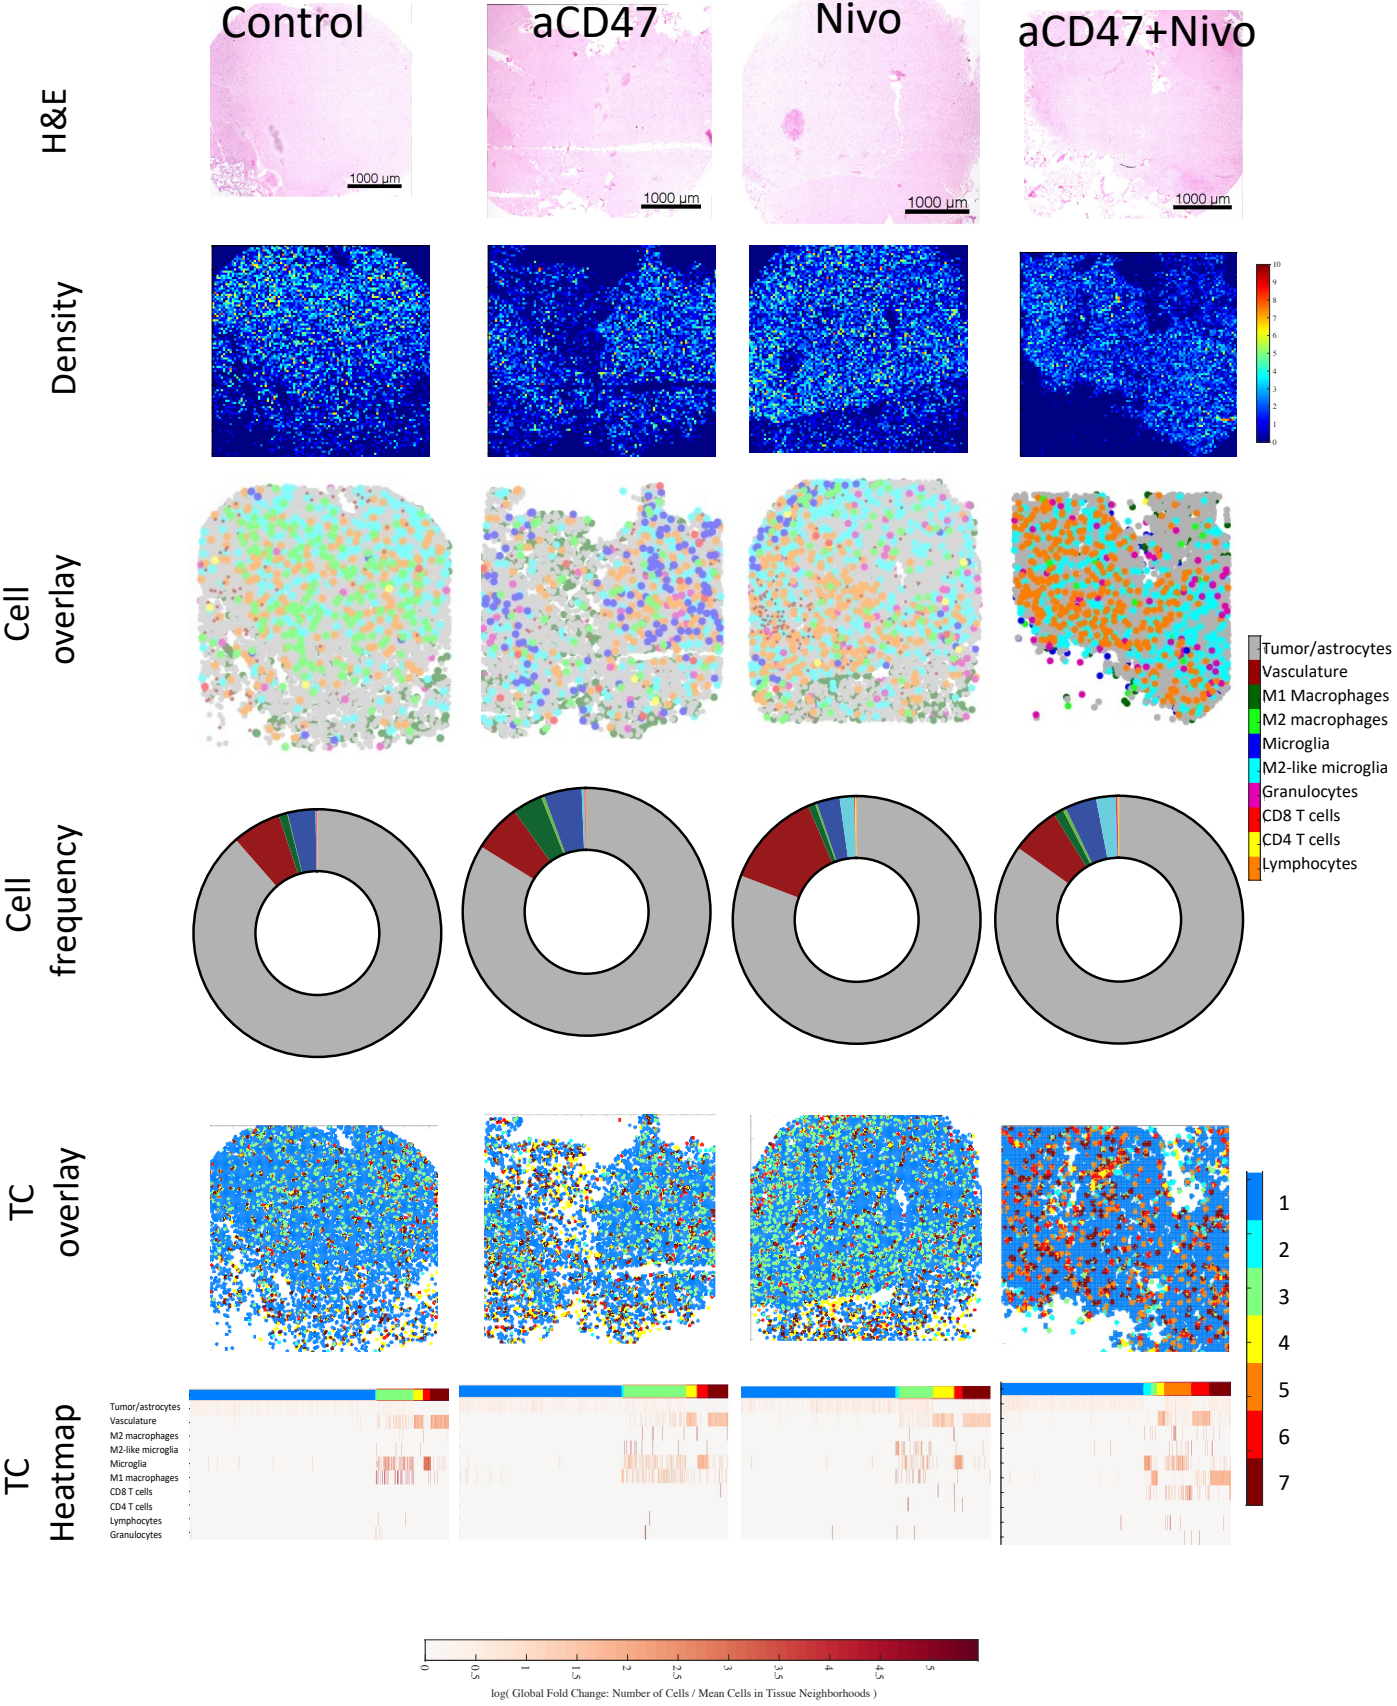

**TC enrichment**

|                   | 1        | 2       | 3       | 4       | 5       | 6       | 7       |
|-------------------|----------|---------|---------|---------|---------|---------|---------|
| Tumor/astrocytes  | 2.135    | 0.1182  | 2.444   | 0.0227  | 0.3205  | 0.6046  | 1.311   |
| Vasculature       | 0.008756 | 0.05201 | 0.3207  | 2.933   | 0.5466  | 0.00899 | 2.807   |
| M2 macrophages    | 0        | 0       | 0.02005 | 0.91354 | 6.92    | 0       | 0.02801 |
| M2-like microglia | 0.001975 | 2.933   | 0.2058  | 0.1423  | 3.533   | 0.1838  | 0.29177 |
| Microglia         | 0.0259   | 0       | 1.824   | 0.02917 | 0.07595 | 1.761   | 0.2952  |
| M1 macrophages    | 0.01461  | 6.421   | 1.257   | 0.0682  | 0       | 0.1833  | 0.21318 |
| CD8 T cells       | 0        | 0       | 0       | 0       | 9.979   | 0       | 0.02196 |
| CD4 T cells       | 0        | 0       | 0.8196  | 0       | 3.202   | 0       | 0.02474 |
| Lymphocytes       | 0.003988 | 0.4099  | 0.1849  | 0       | 6.203   | 0.02408 | 0.13142 |
| Granulocytes      | 0.005824 | 8.7     | 0.1808  | 0.07195 | 0       | 0       | 0.0421  |
| Percentage        | 72.08    | 0.402   | 14.14   | 3.201   | 0.1208  | 2.71    | 6.54    |

Figure S6

**Fig. S6. Individualized treatment outcomes per patient and per region.**

For each patient (center and periphery), a set of personalized calculations were generated. *1st row*: H&E (stitched together after CODEX run) stains of explants control (GBM) and treatment conditions, scale bar: 1000 $\mu$ m. *2nd row*: point density plot (x-y plot is divided into a 100x100 grid, in which every rectangle is colored corresponding to the number of elements within this square). *3rd row*: Cell overlay, each dot represents an individual, annotated cell type according to the final cell type annotation. Color code of cell types displayed on the right; *4th row*: pie chart of cell type proportions within each individual explant. *5th row*: tissue compartment (TC) overlay, according to 7 TCs outlined in Figure 3 (cf. Figure 3 and text for TC naming and numbering). *6th row*: TC region heatmap depicting the TC frequency (top bar, similar color code as in TC overlay), and the global fold change (number of cells per mean cells in TC) of specific cell types per TC. *7th row*: region enrichment heatmaps depicting the fold change enrichment of cell type composition per TC, and the overall percentage of the TC within an individual sample.

**A**

**Center**

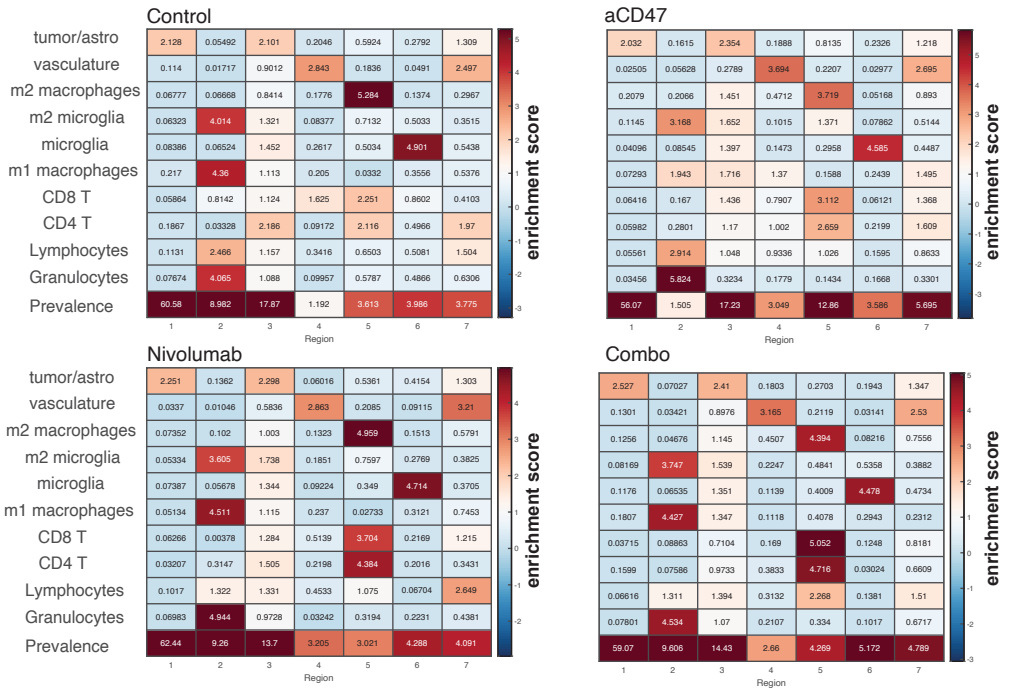

**B**

**Periphery**

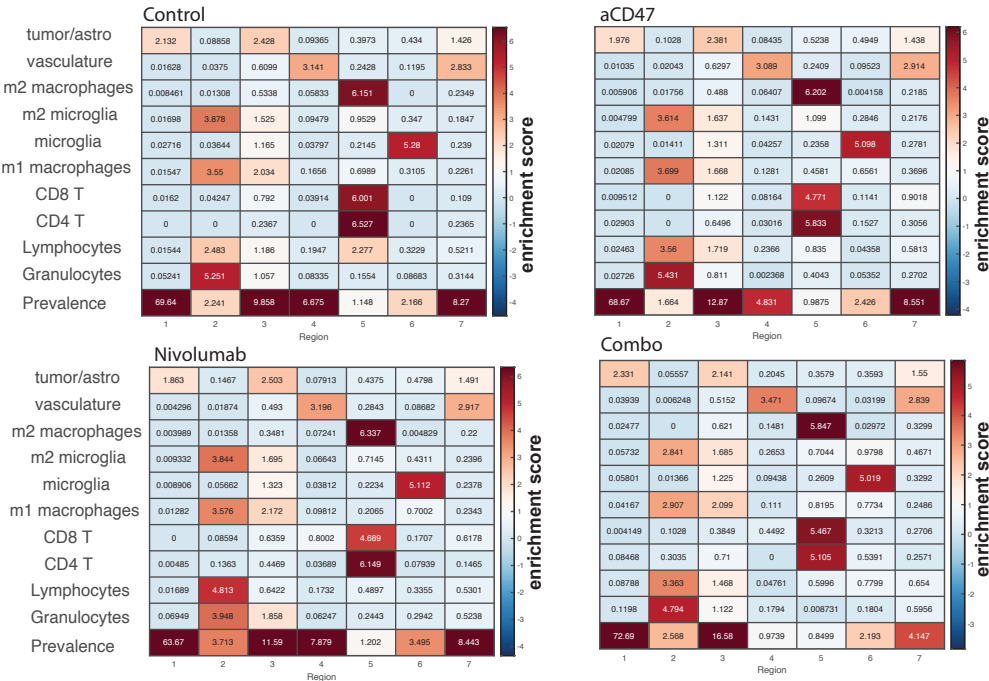

**C**

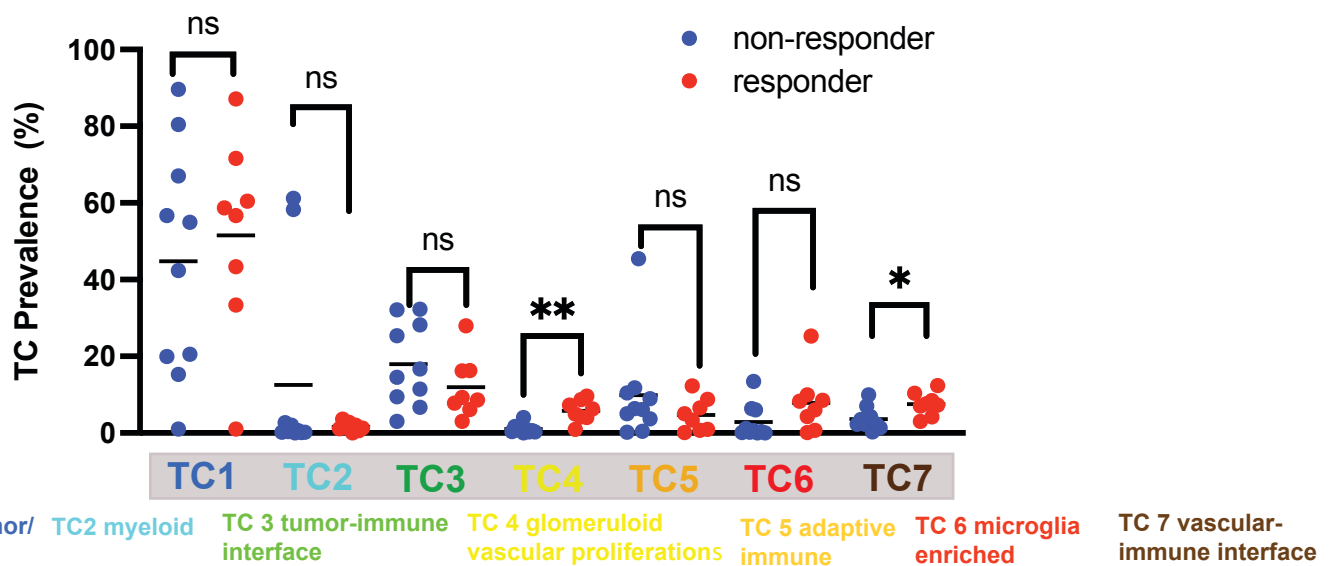

**Figure S7**



**Fig. S7. TC enrichment scores per therapeutic condition and location; TC prevalence changes in responding vs. non responding explants.**

Individual enrichment scores of cell types in respective TCs stratified per treatment and biopsy locations in pooled explants- (A) center explants: n=6 for control, n=7 for anti-CD47, n=7 for Nivolumab and n=7 for anti-CD47+Nivolumab; (B) periphery explants: n=5 for control, n=5 for anti-CD47, n=4 for Nivolumab and n=5 for anti-CD47+Nivolumab. (C) TC prevalence changes in non-responding vs. responding center explants, cf. Fig. 6A, lower panels. Statistics: \* $p < 0.05$ , \*\* $p < 0.01$ , Welch's t-test,

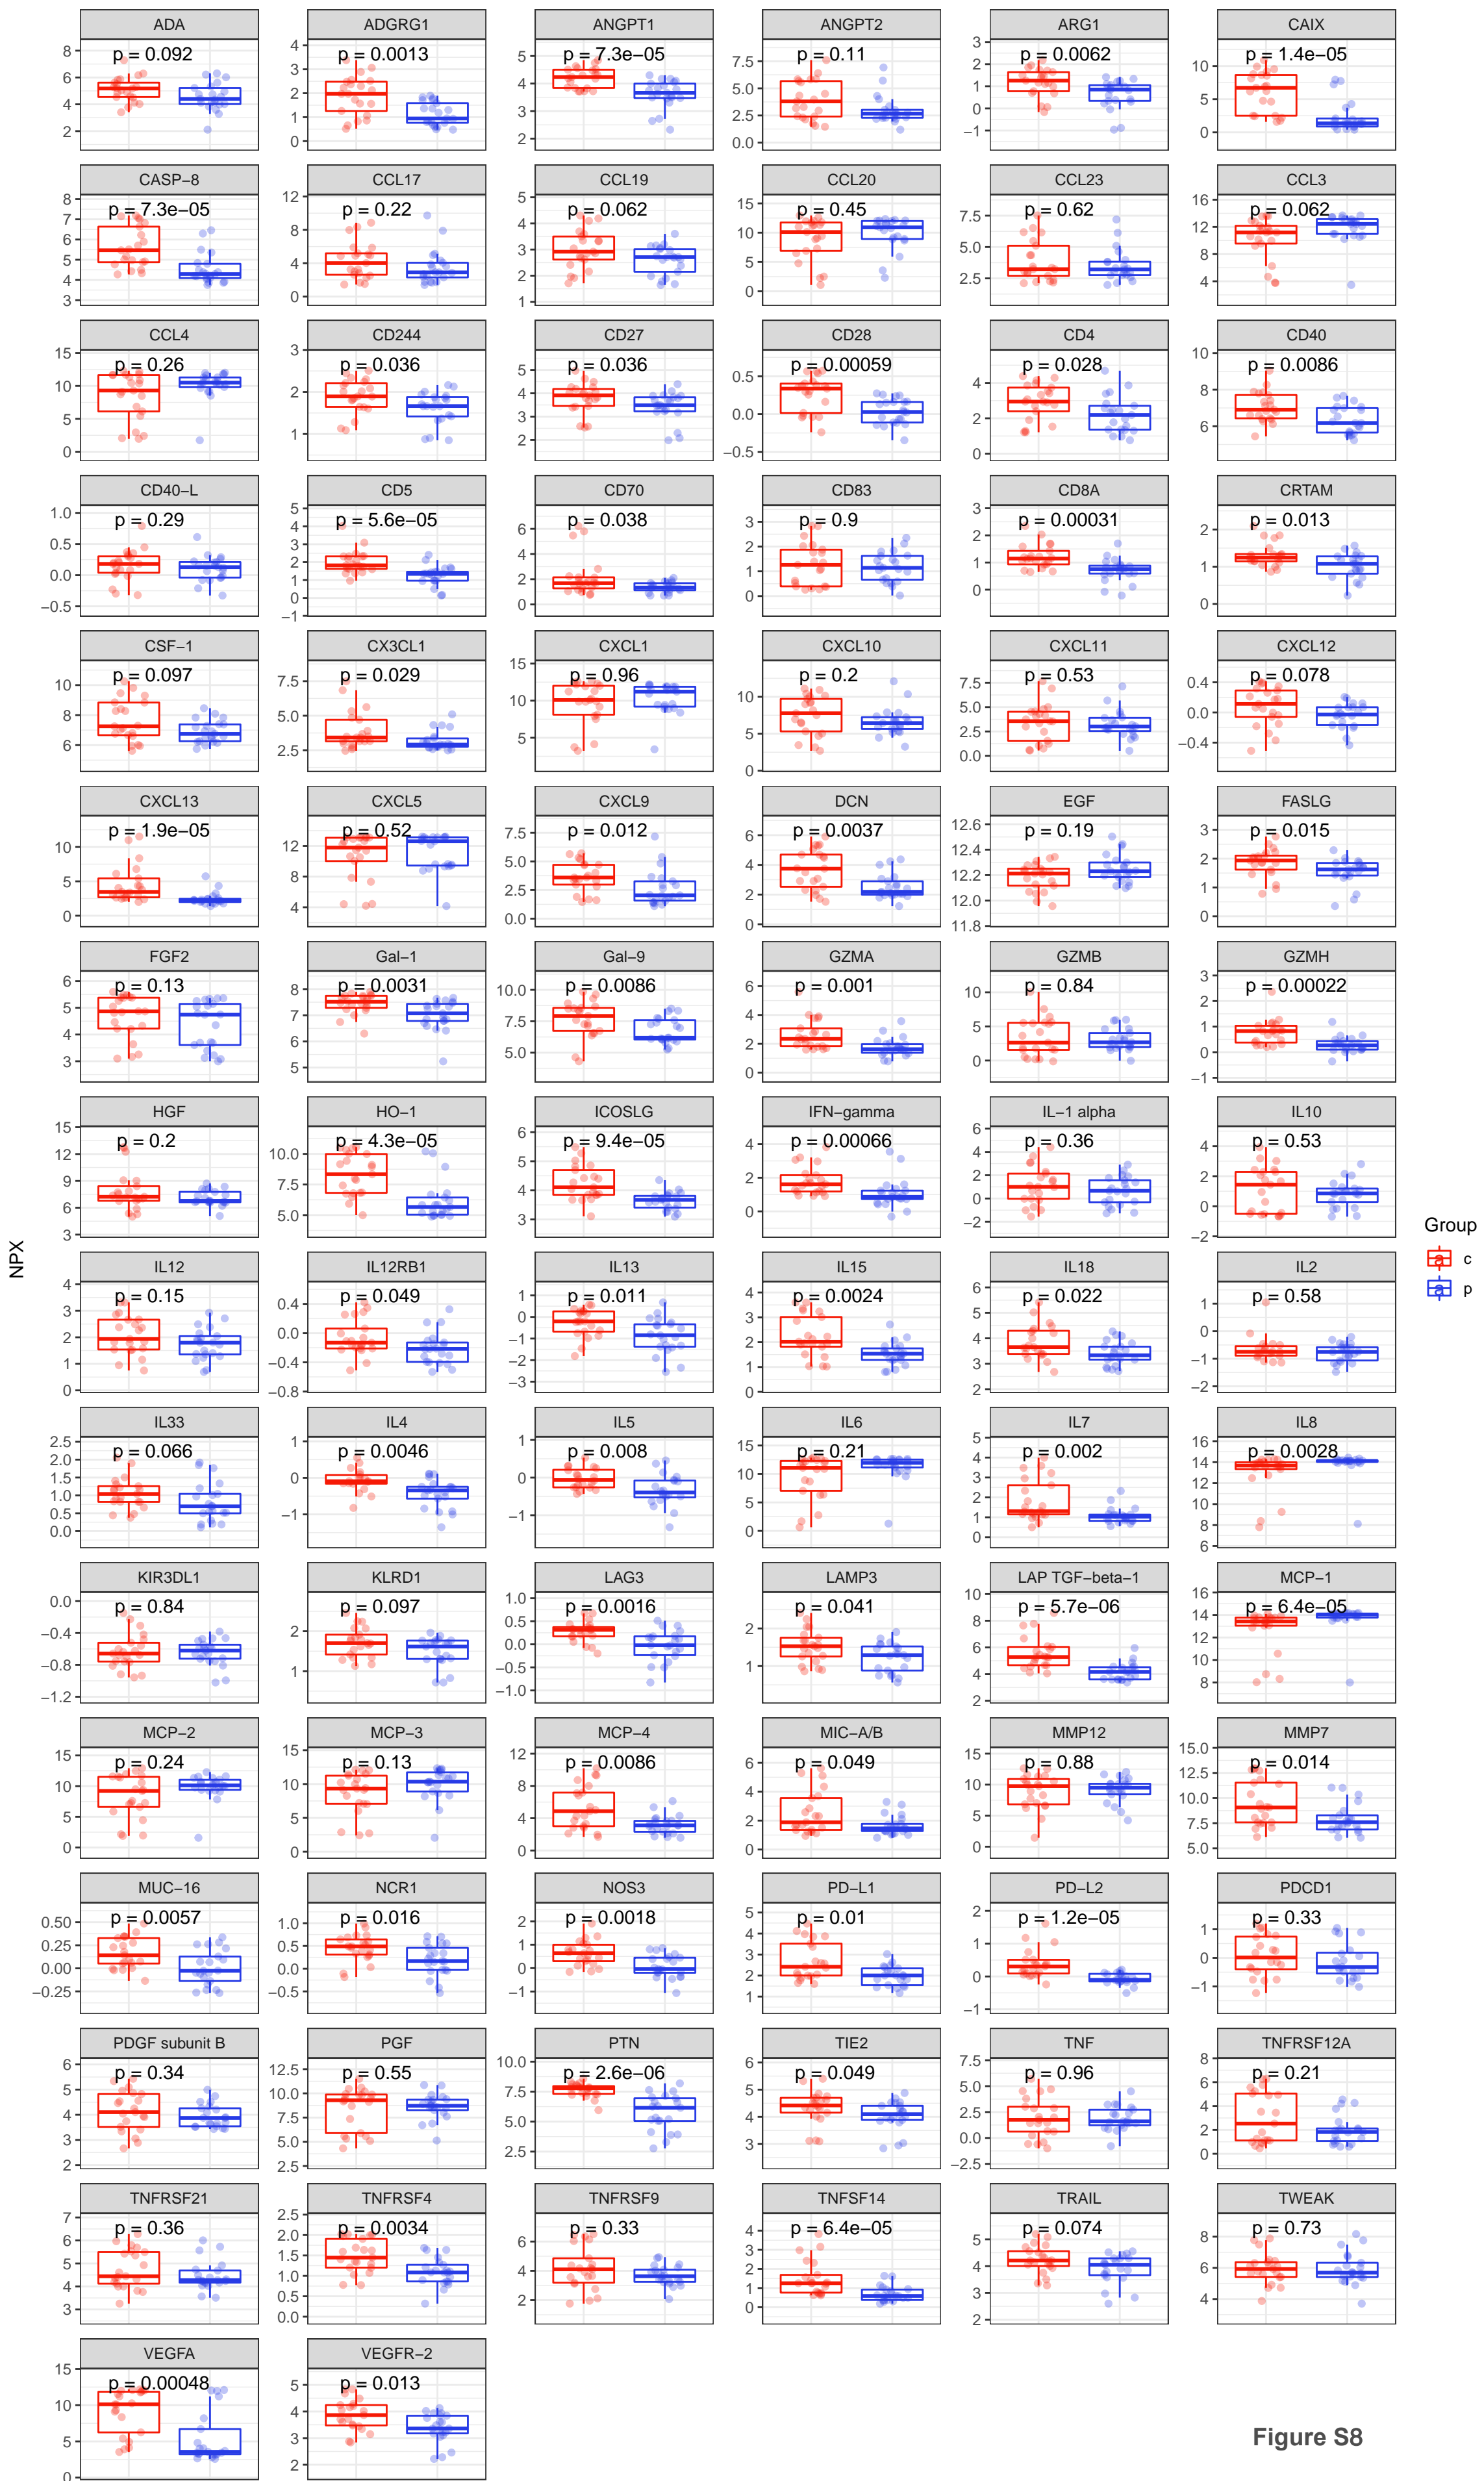

Figure S8

**Fig. S8. Differential expression of cytokines in treated center and periphery explants.**

Results from multiplexed bead based proximity extension assay of 92 analytes in the bioreactor culture supernatant. Comparison of pooled treated (all conditions) center (n=21) and periphery (n=21) explants independent of response. Only significant results are displayed. Values are displayed as mean +/- SEM. NPX: Log2 scaled **normalized protein expression**. Statistics: ANOVA with multiple comparison adjustments. Welch's t-test between the groups.

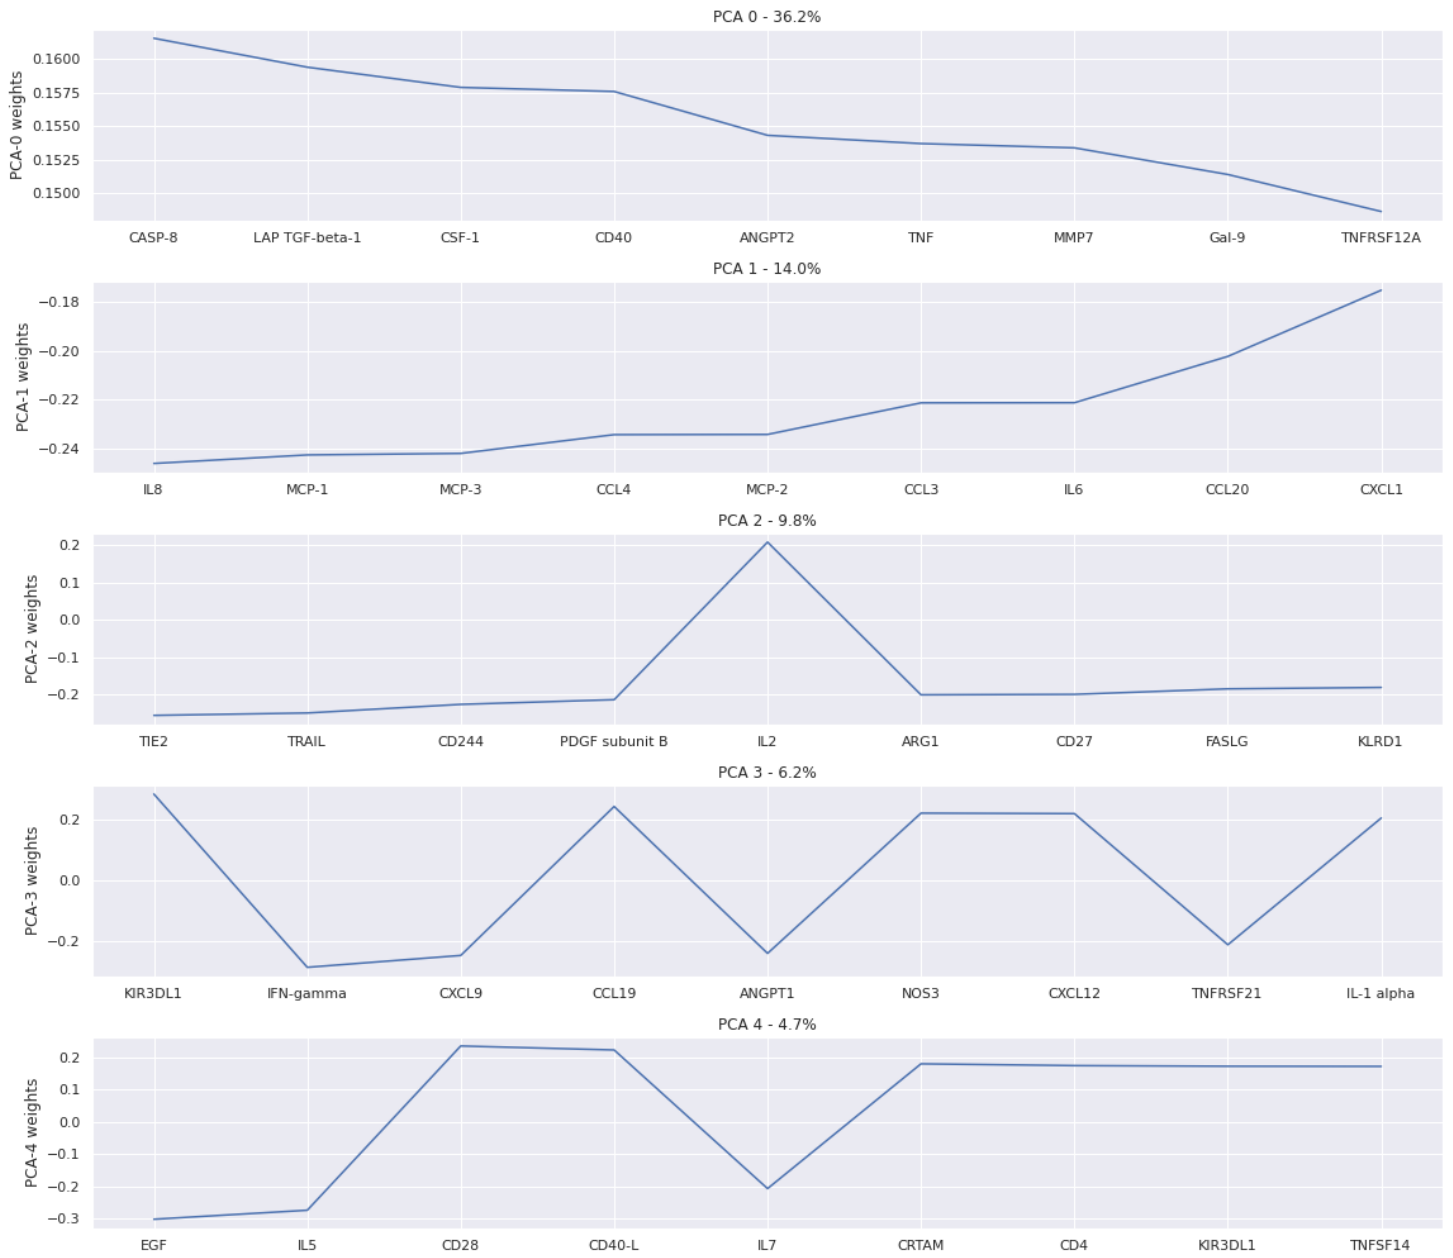

Figure S9

**Fig. S9. PCA Loadings of unbiased cytokine analysis in center and periphery.**

PCA loadings of the principal component analysis in **Figure 5D**.

A

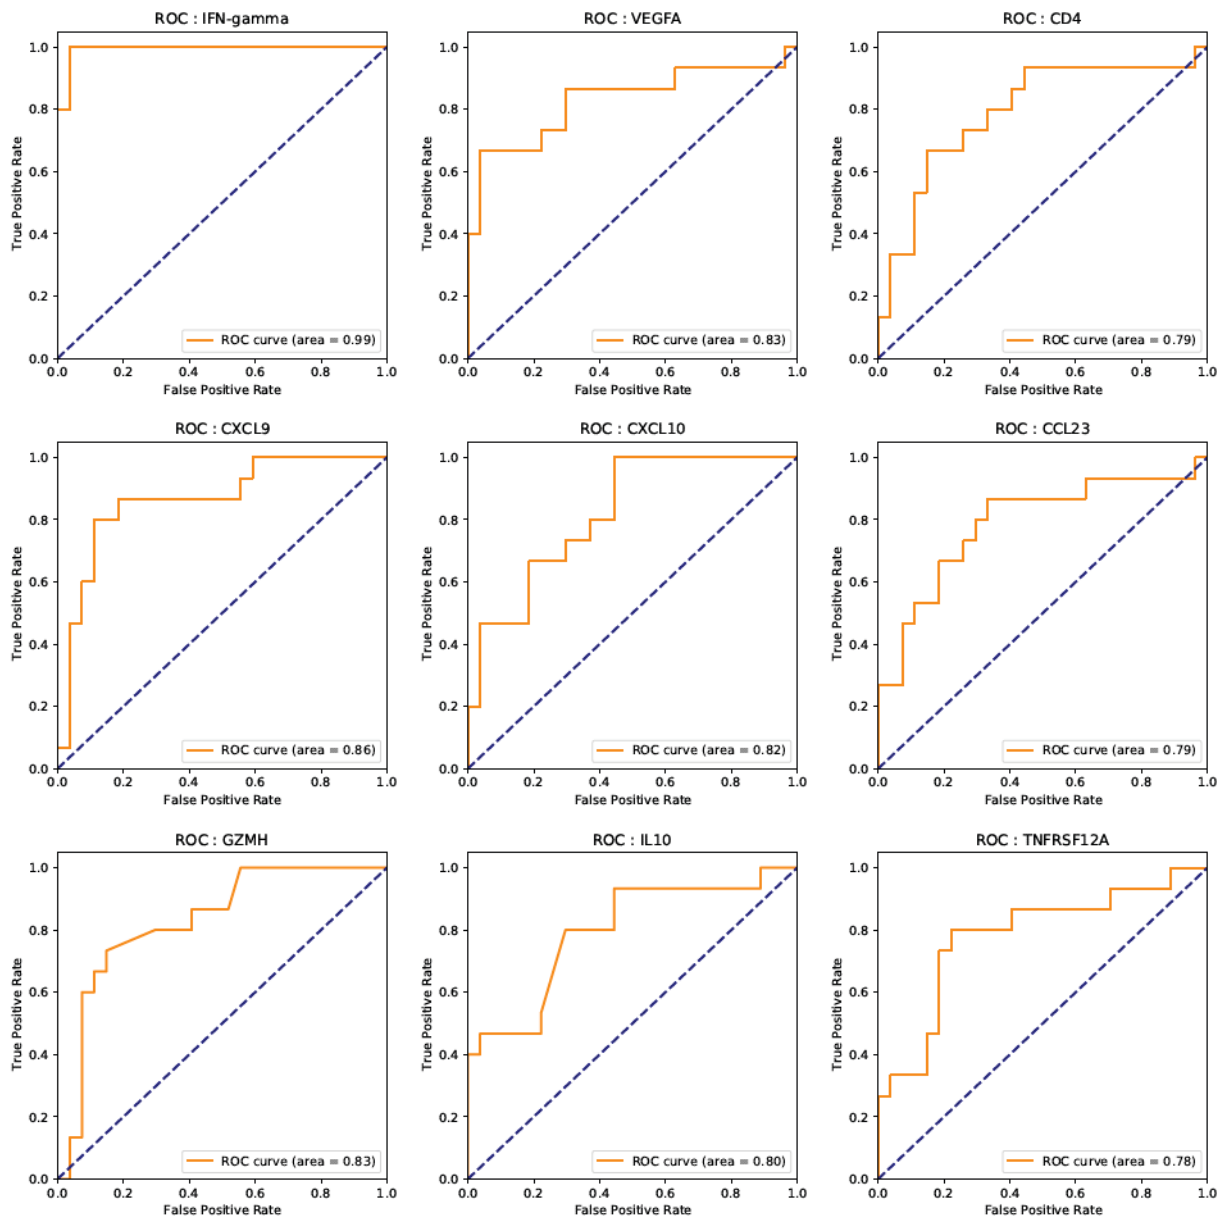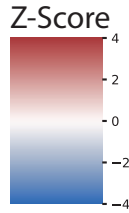

B

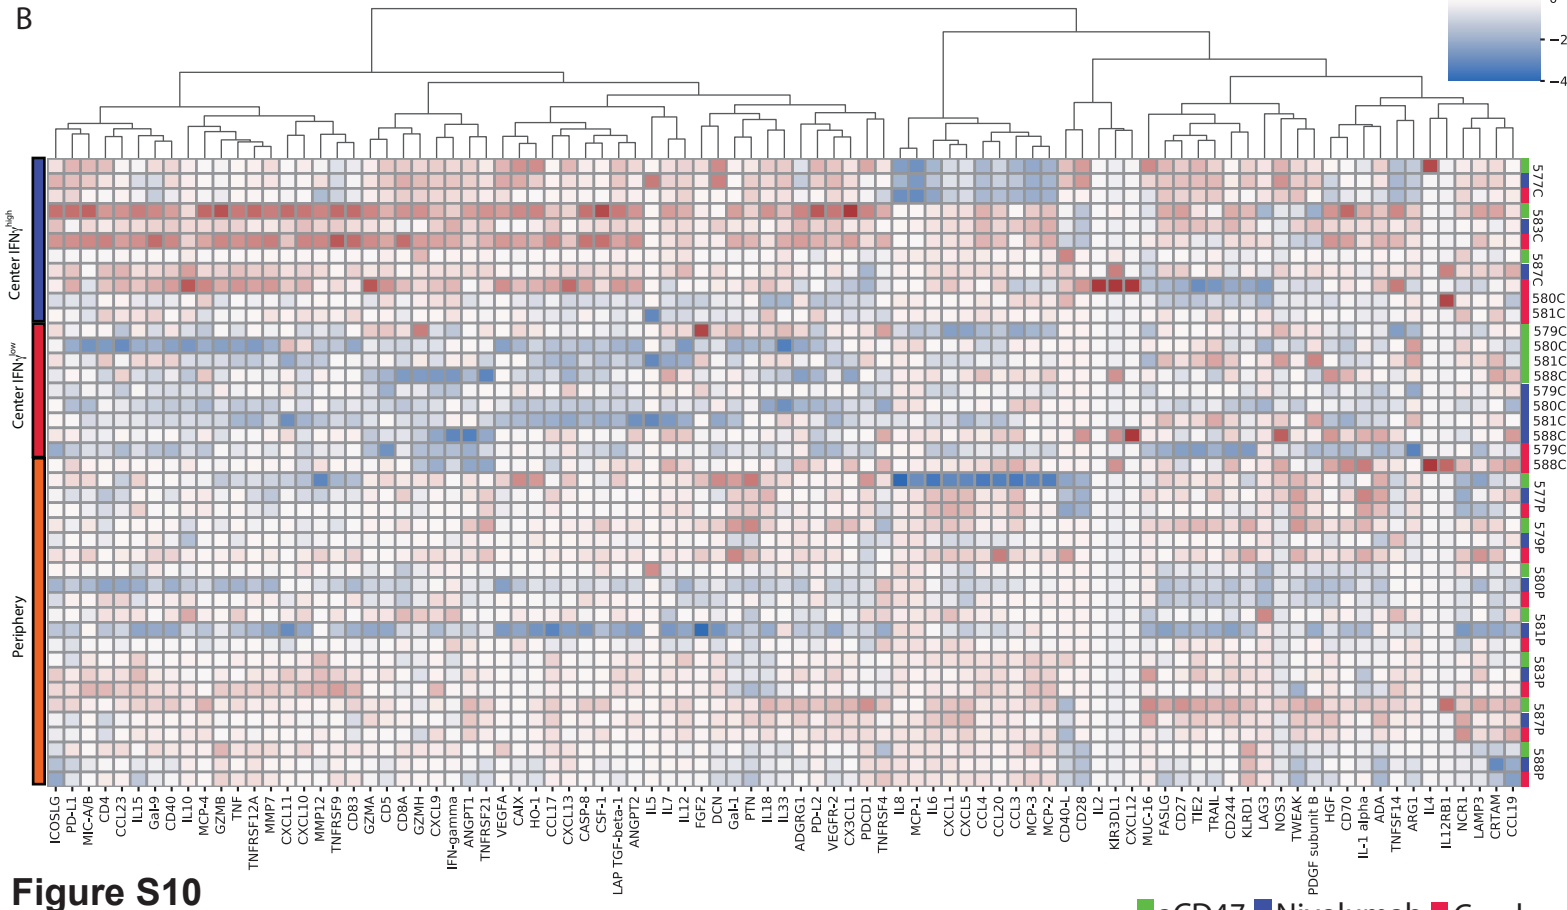

Figure S10

aCD47 Nivolumab Combo

**Fig. S10. AUC-ROC analysis of cytokines associated with IFN $\gamma$ , heatmap clustering of cytokines stratified per IFN $\gamma$  status and location.**

(A) Based on the IFN $\gamma$  stratification criterion, we performed an AUC-ROC analysis of other associated cytokines in center explants. Cytokines with a AUC > 0.78 were determined to have a high association with IFN $\gamma$  and are listed. (B) Normalized heatmap depicting the overall explant cytokine response per treatment in IFN $\gamma^{\text{high}}$  and IFN $\gamma^{\text{low}}$  center explants, and periphery explants. Samples were normalized to internal control condition.

# Untreated explants

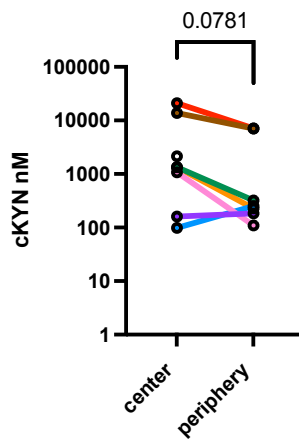

## Center

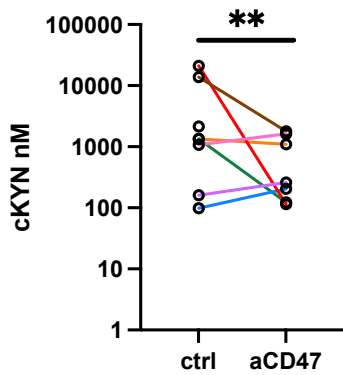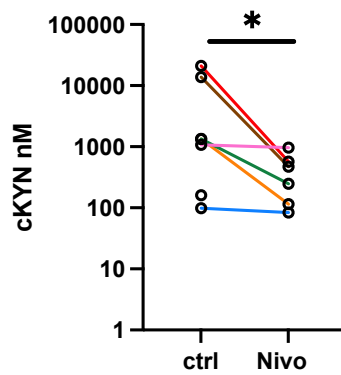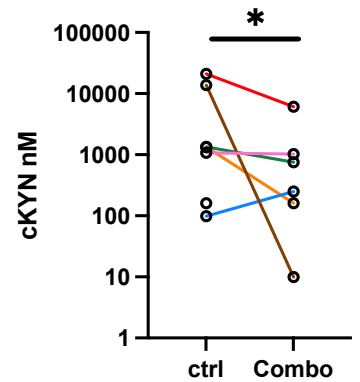

## Periphery

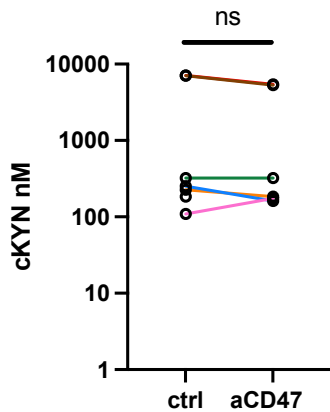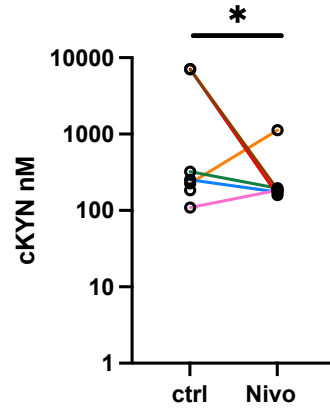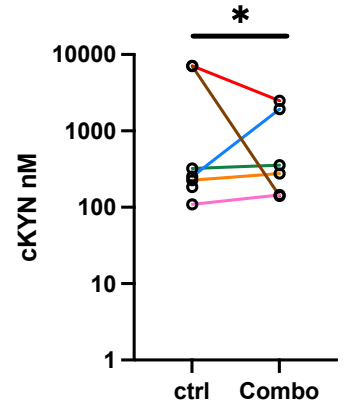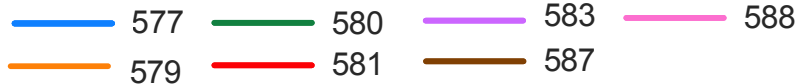

Figure S11



**Fig. S11. KYN modulation in individual patient explants after immunotherapy, and based on IFN $\gamma$  status.**

Assessment of KYN concentrations (nM) in explant culture supernatant by LC-MS in control and immunotherapy treated center and periphery explants. Each dot represents an individual LC-MS measurement. The coloured connecting lines are pairs of individual patients. *Statistics:*

\*p<0.05, \*\*p<0.01, \*\*\*p<0.005, Wilcoxon test.

# Center, CD4 T-cells

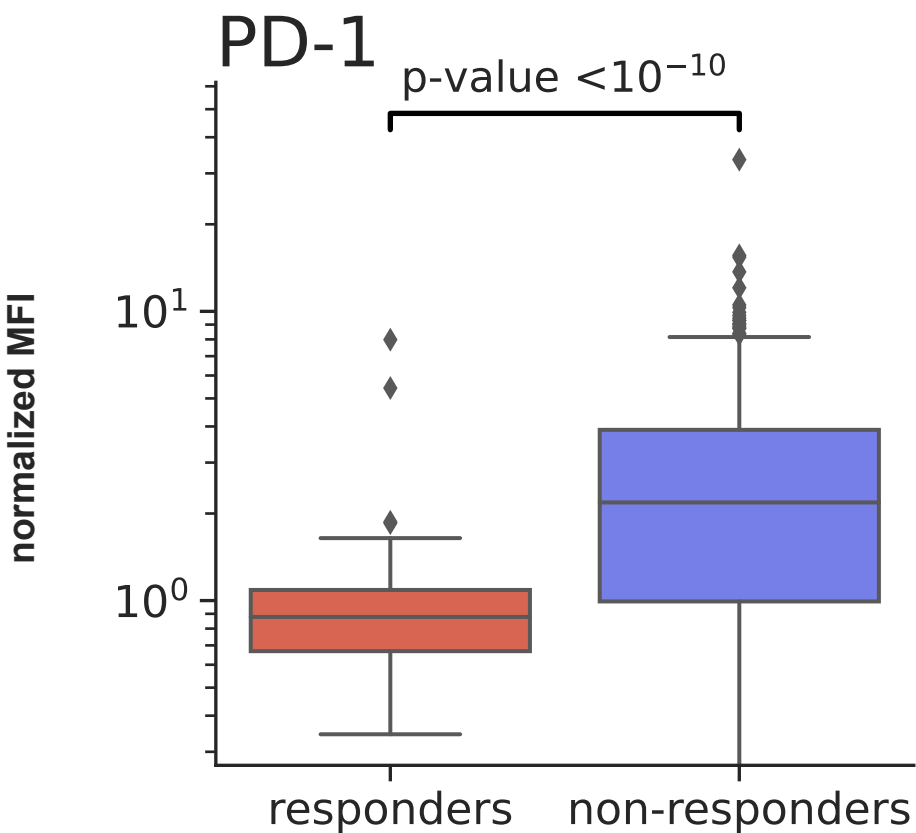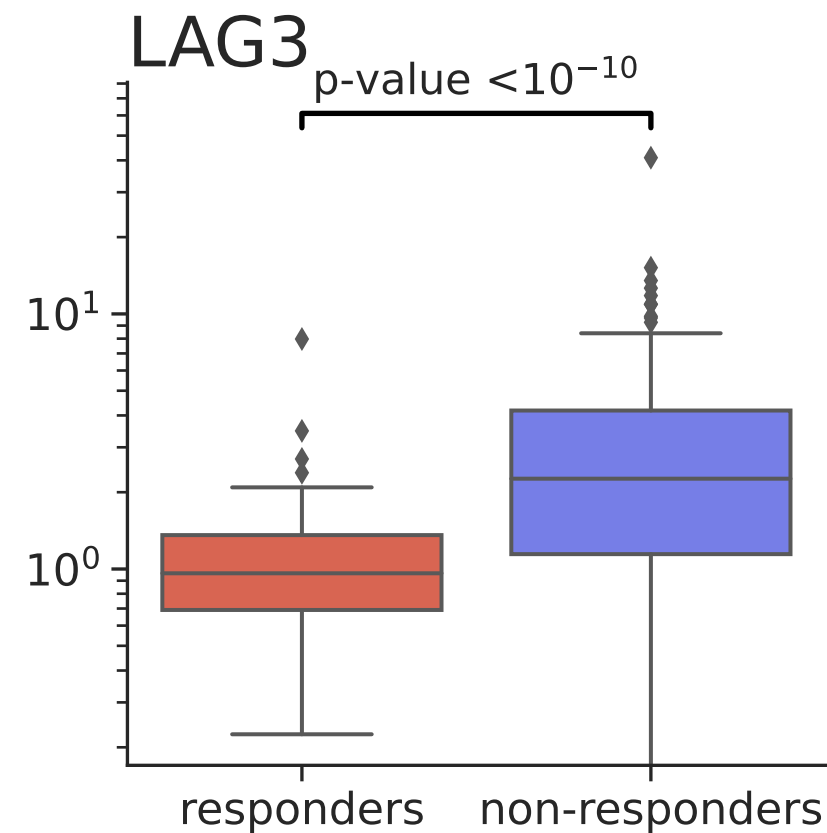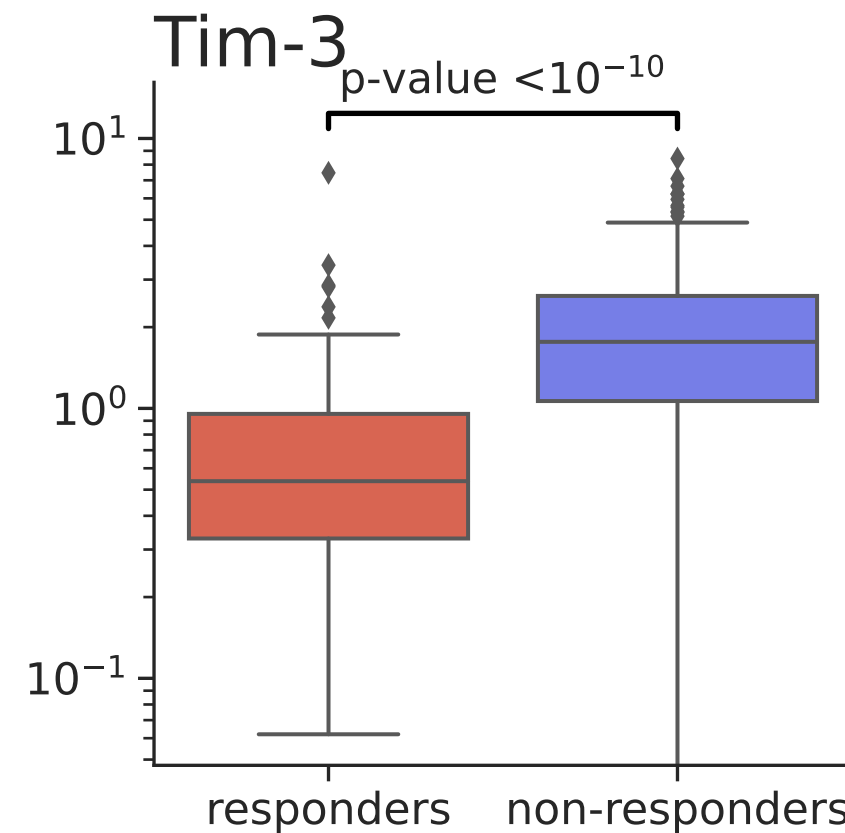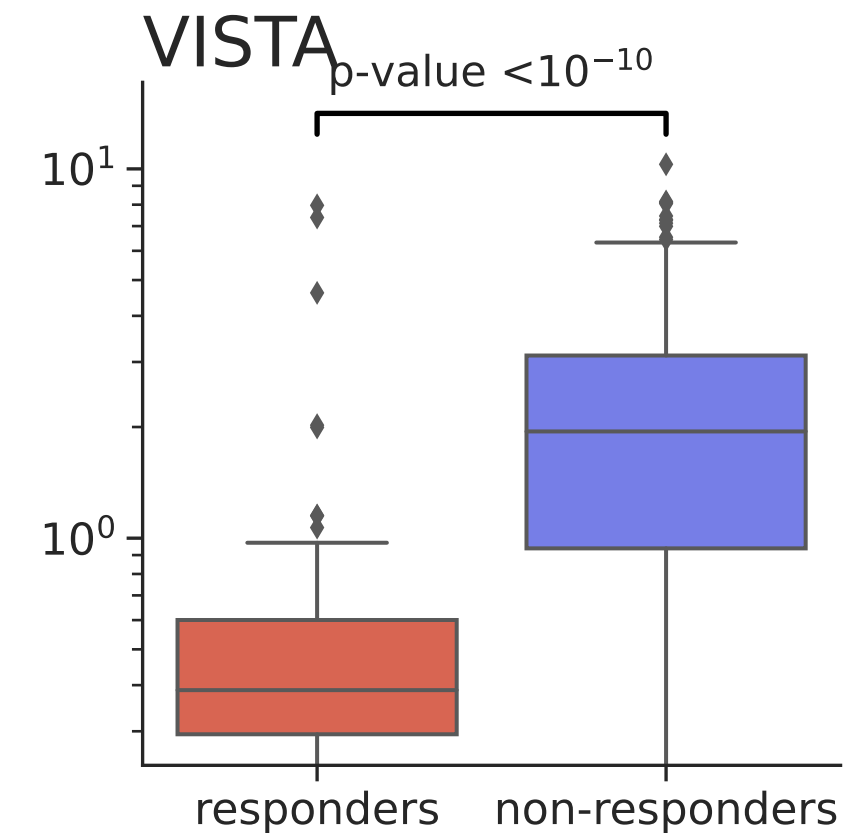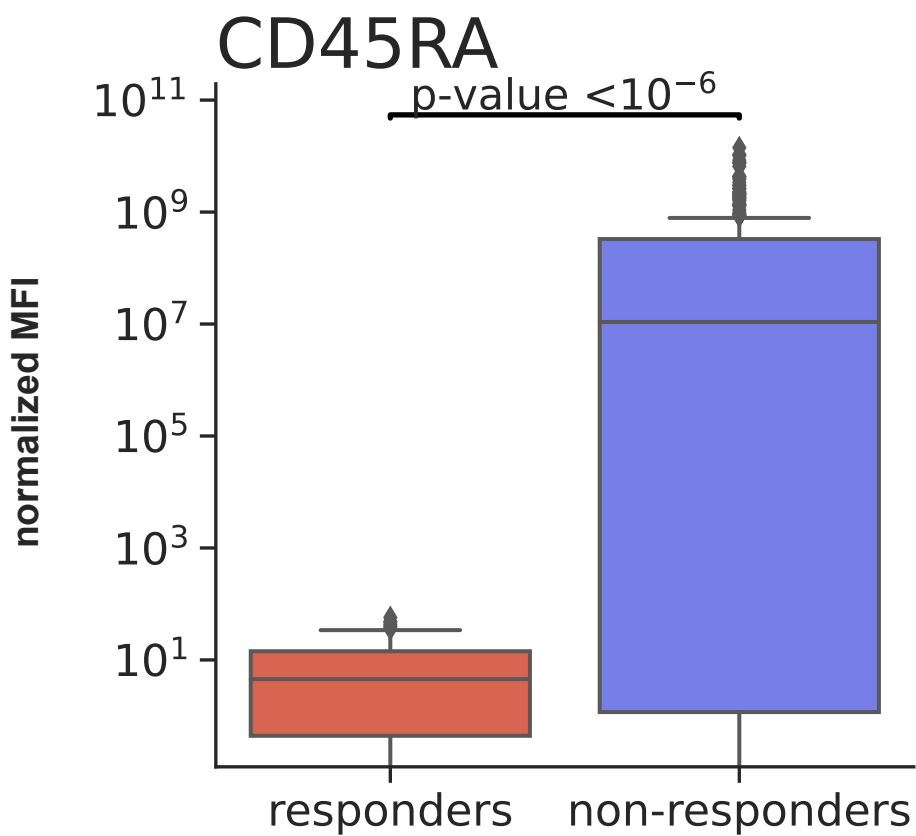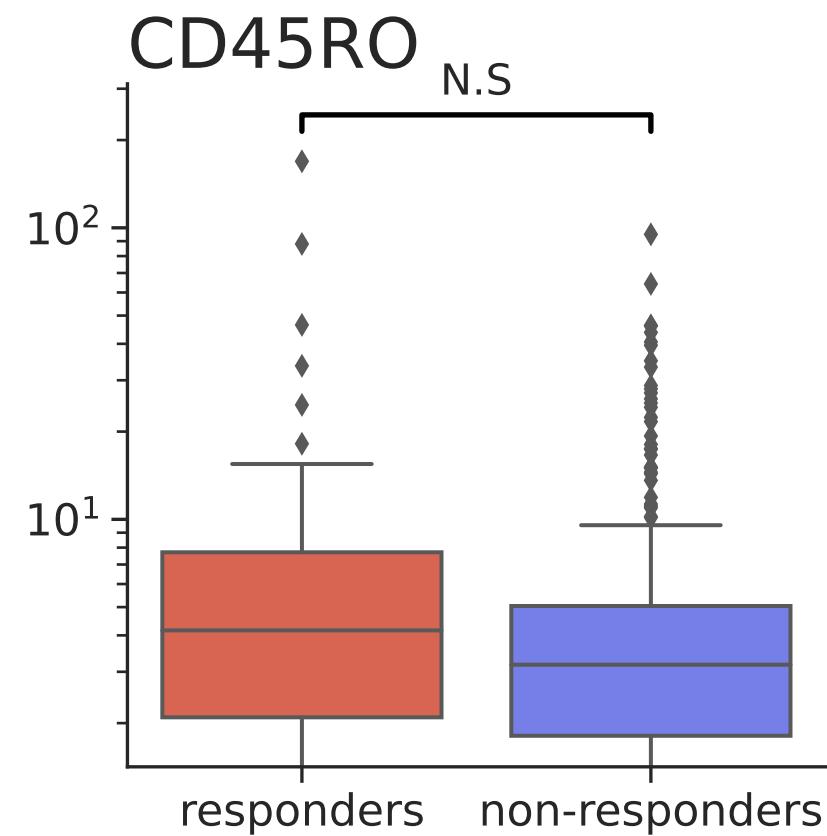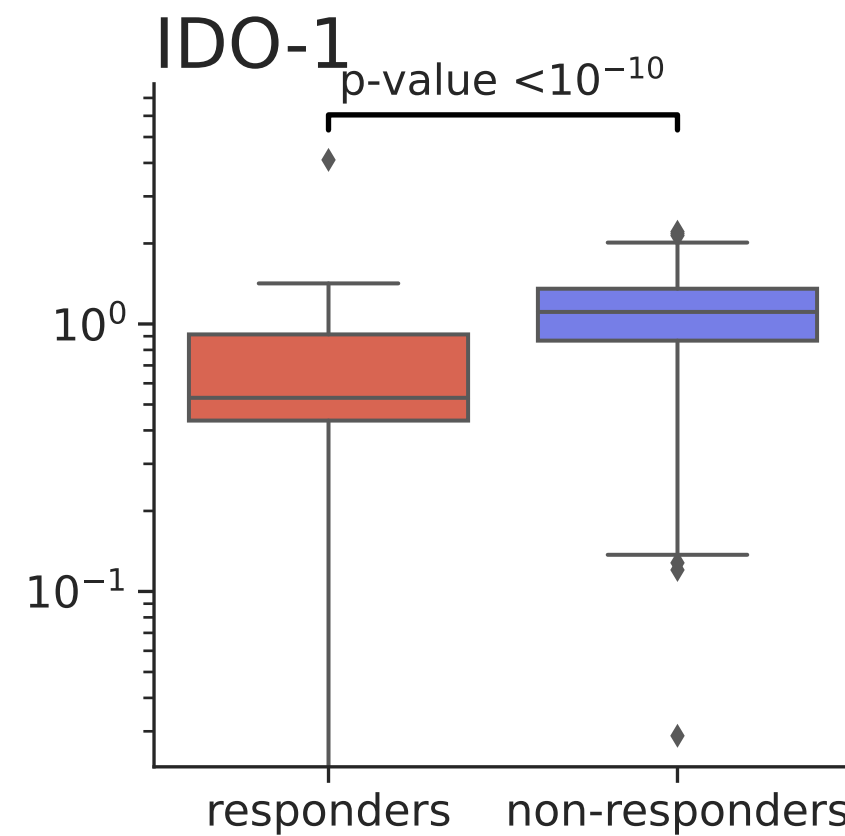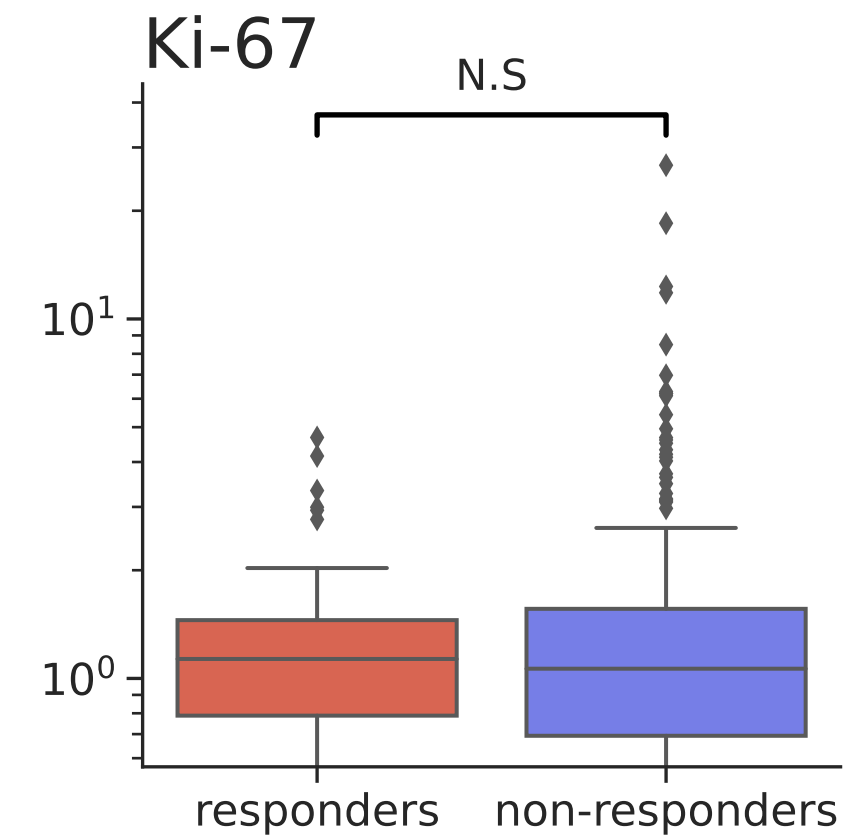

# Periphery, CD4 T-cells

### PD-1

N.S

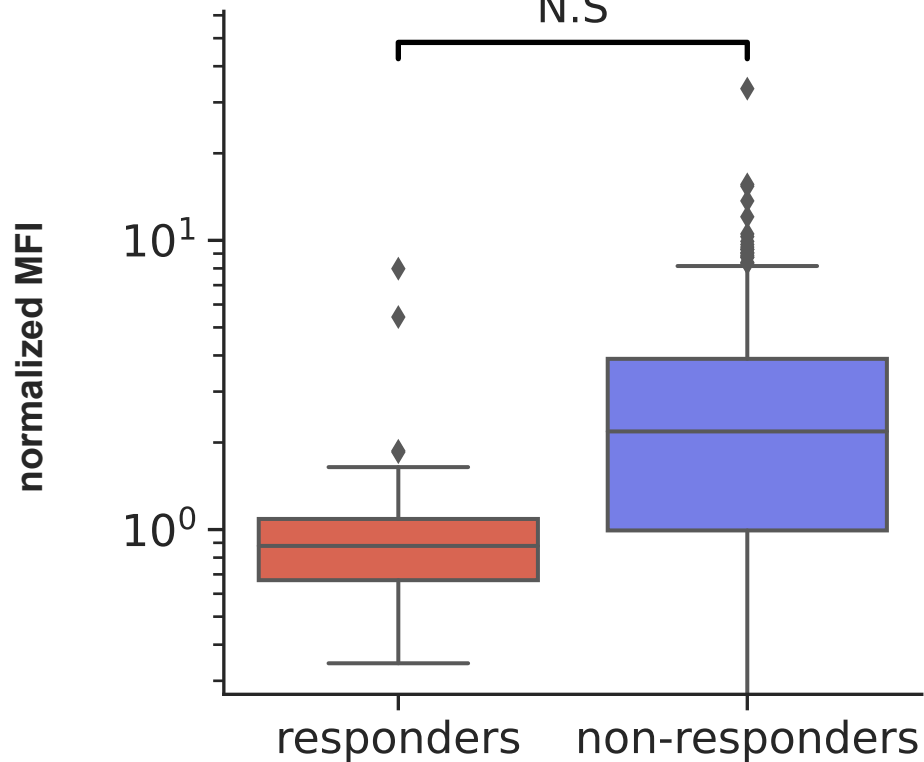

### LAG3

N.S

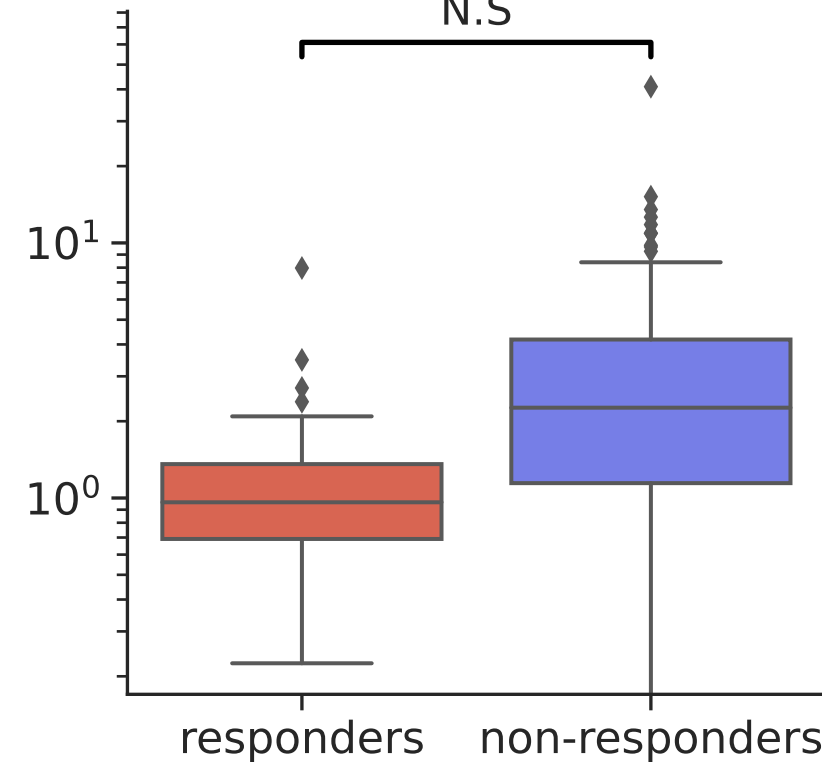

### Tim-3

N.S

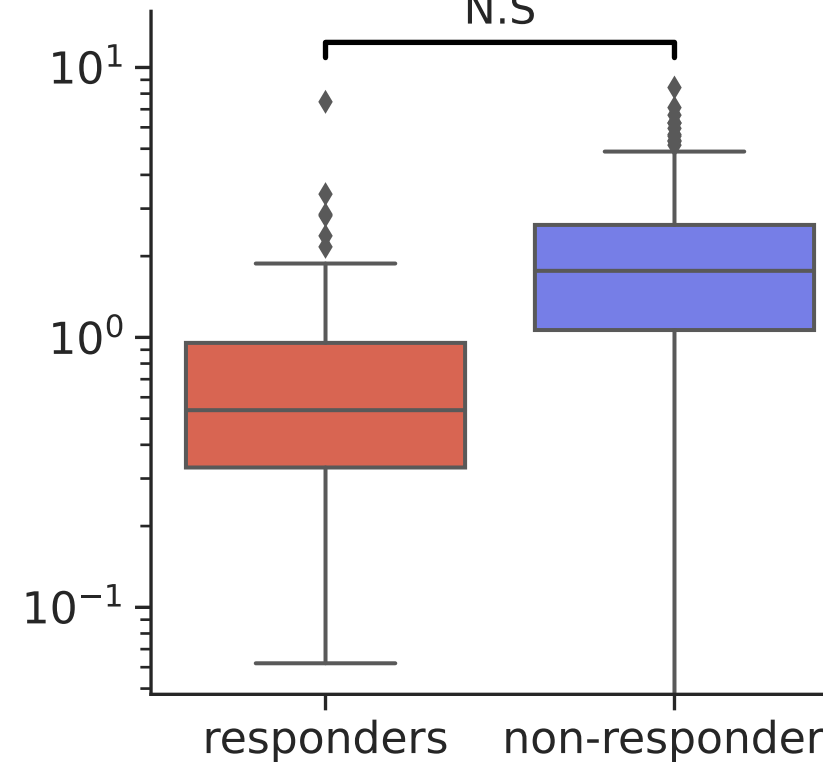

### VISTA

N.S

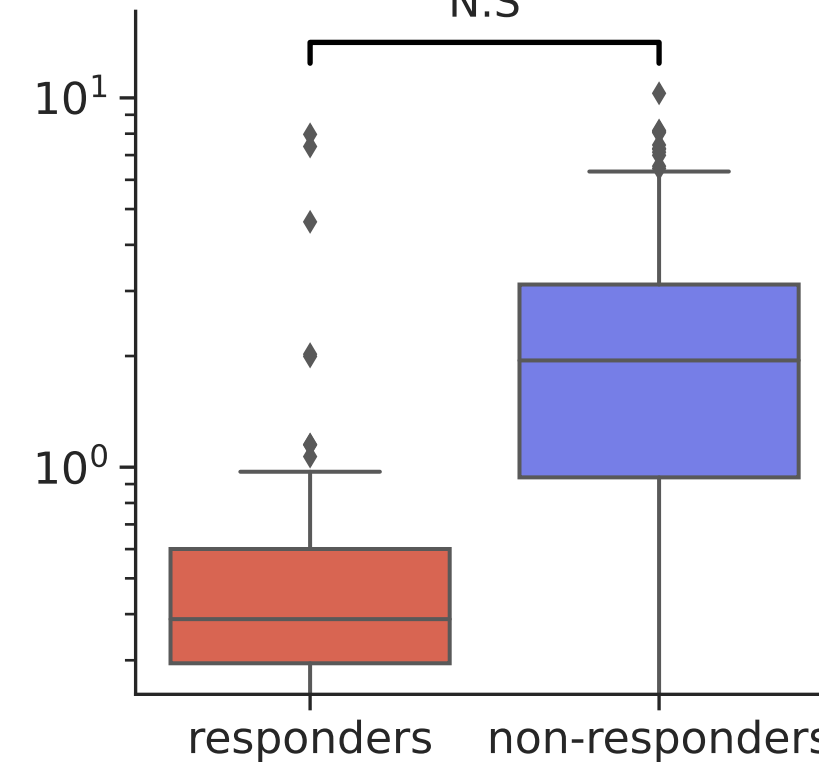

### CD45RA

N.S

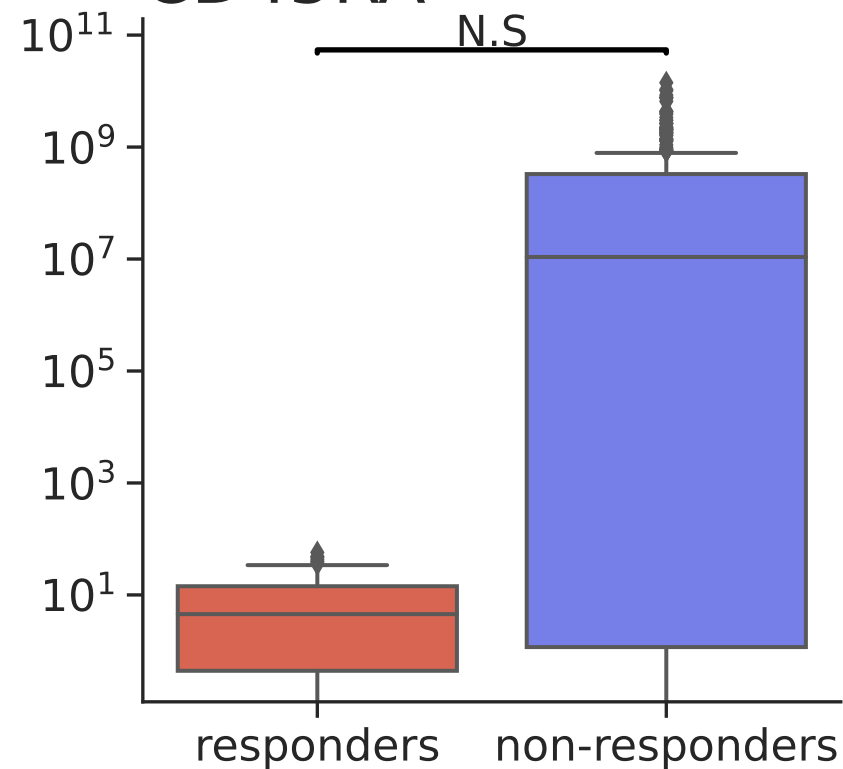

### CD45RO

p-value < 10<sup>-2</sup>

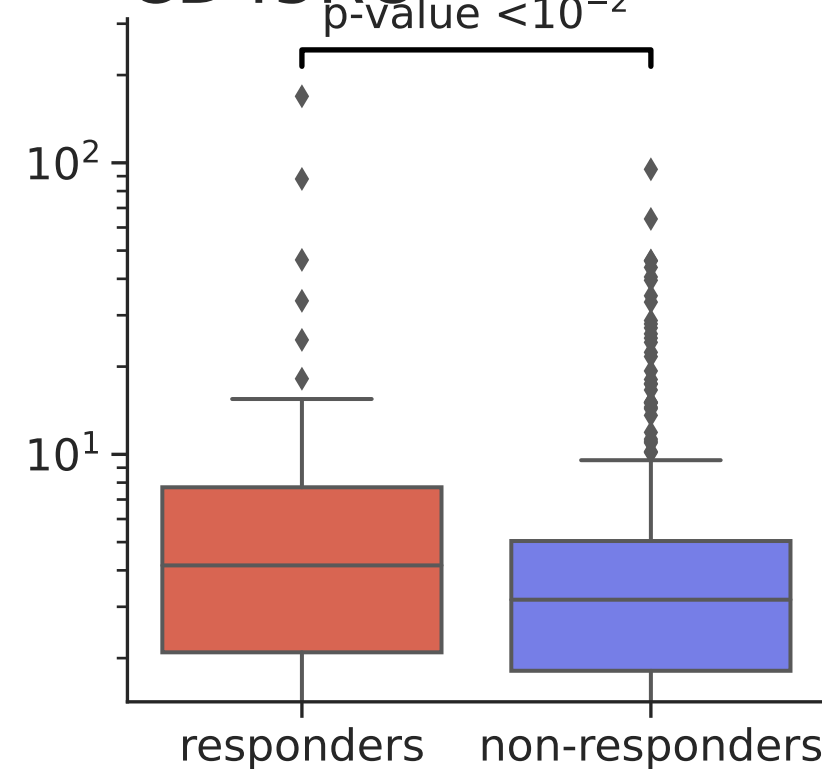

### IDO-1

N.S

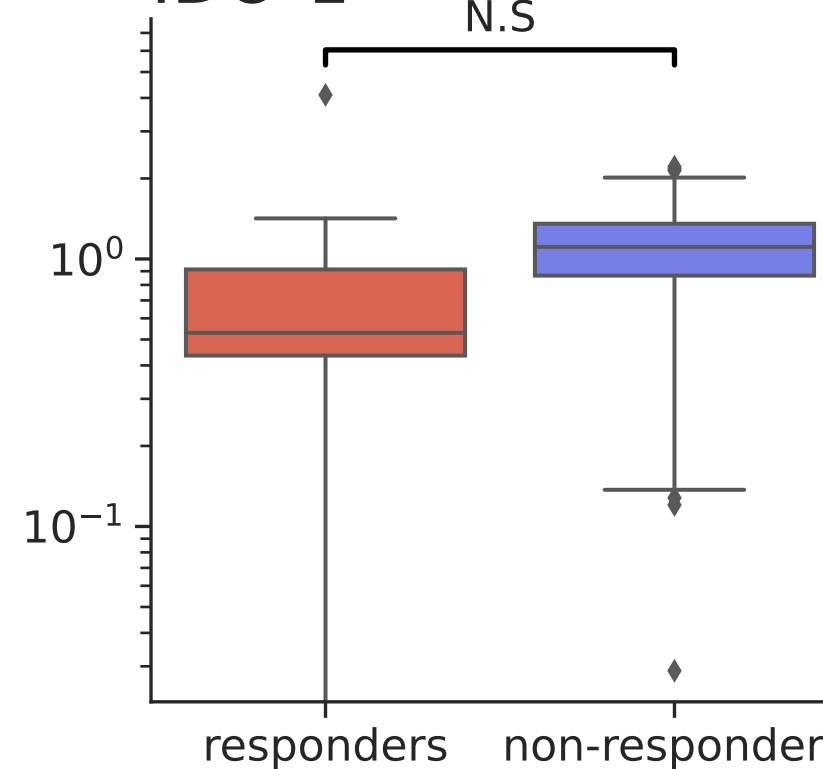

### Ki-67

N.S

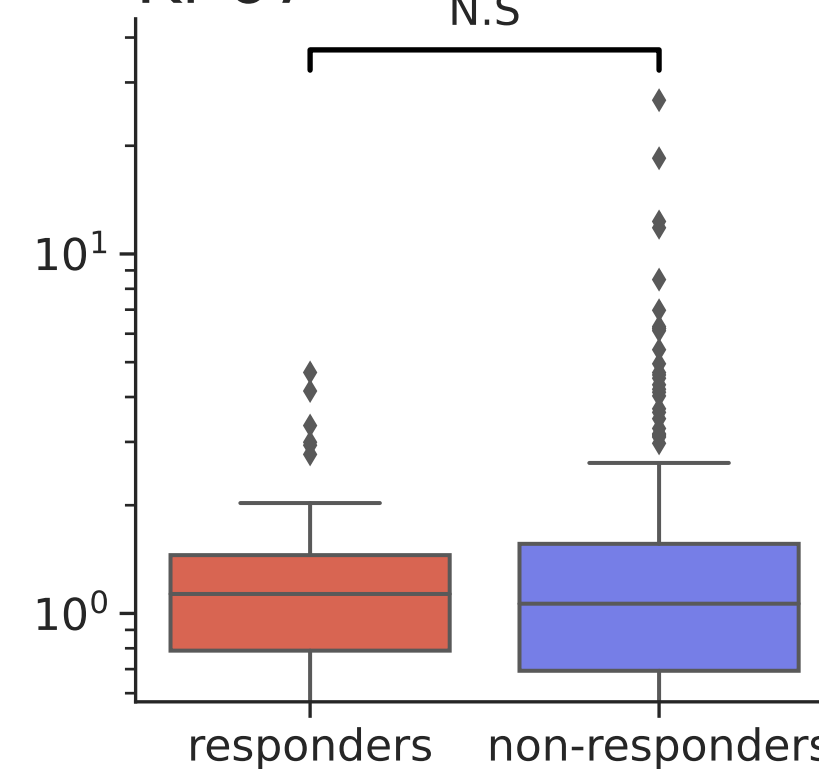

# Center, CD8 T-cells

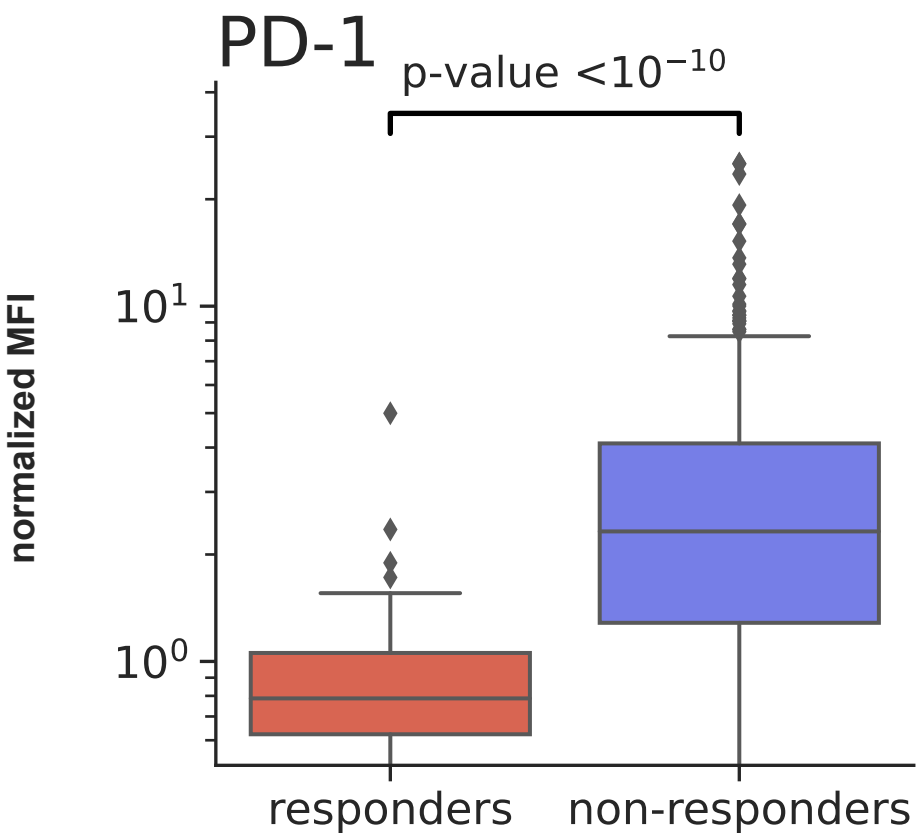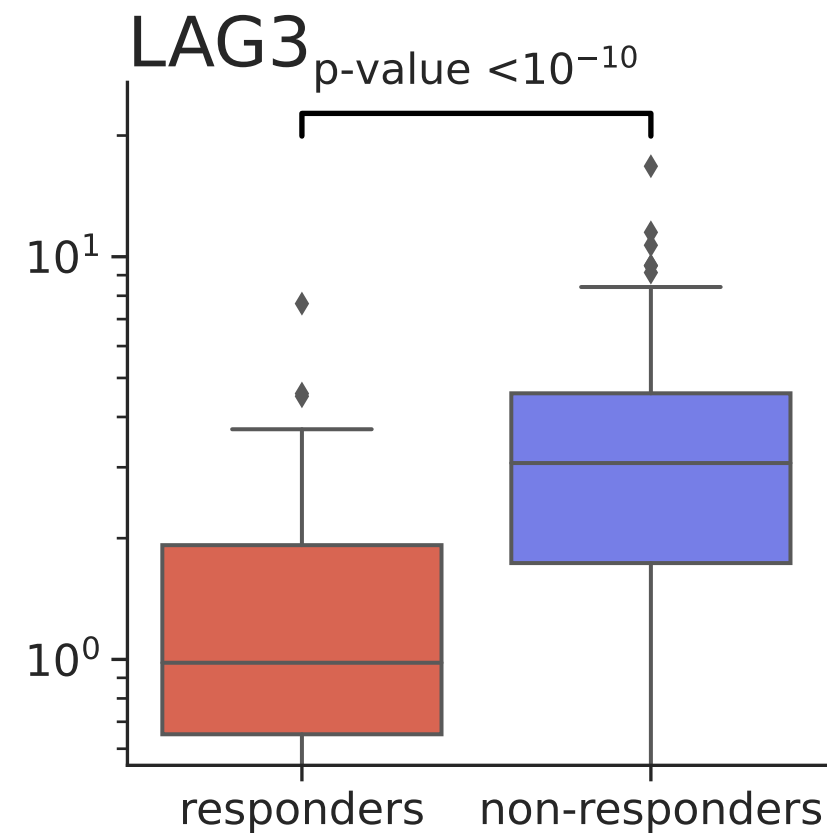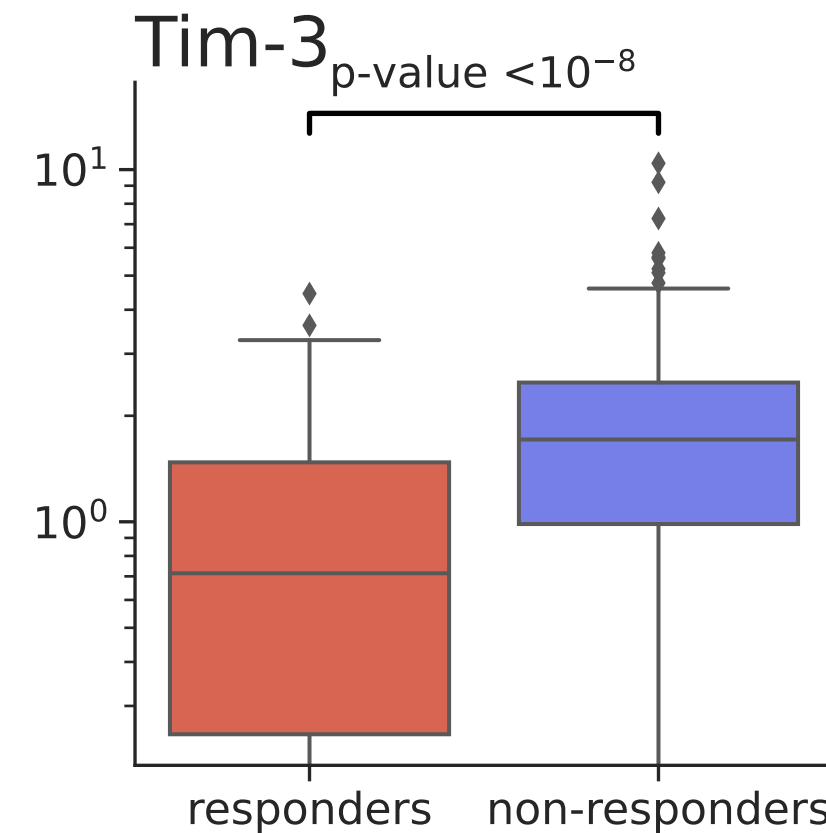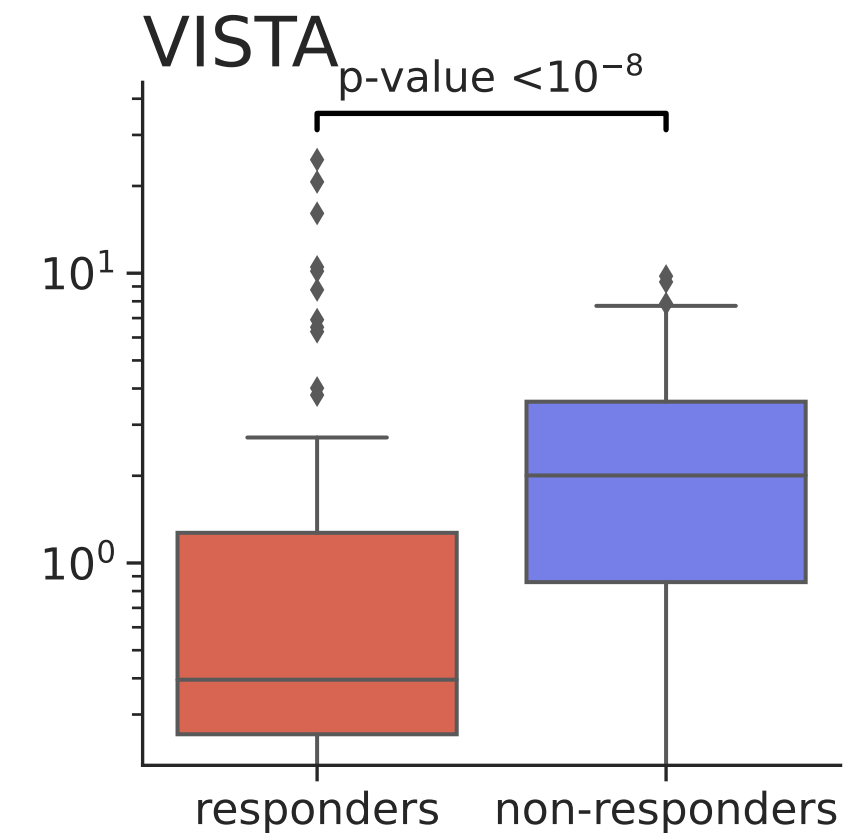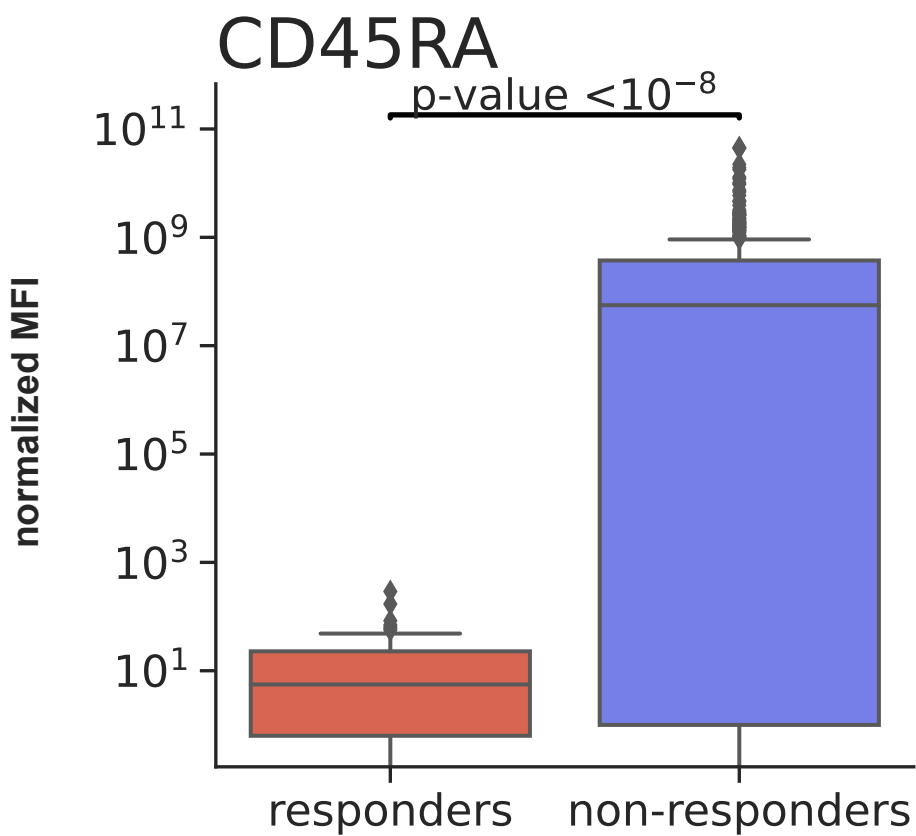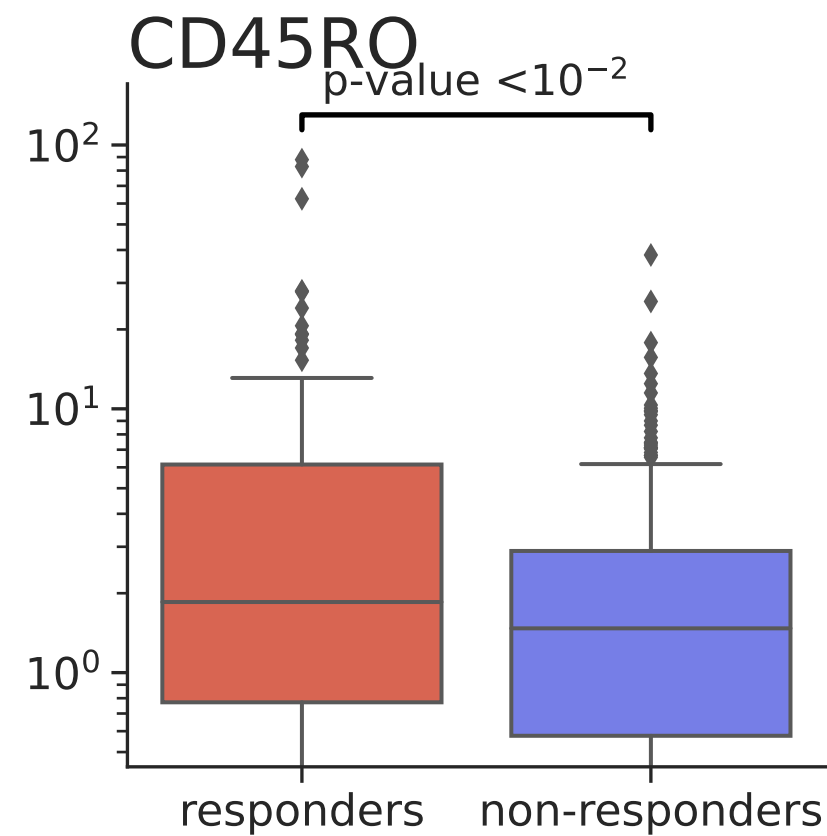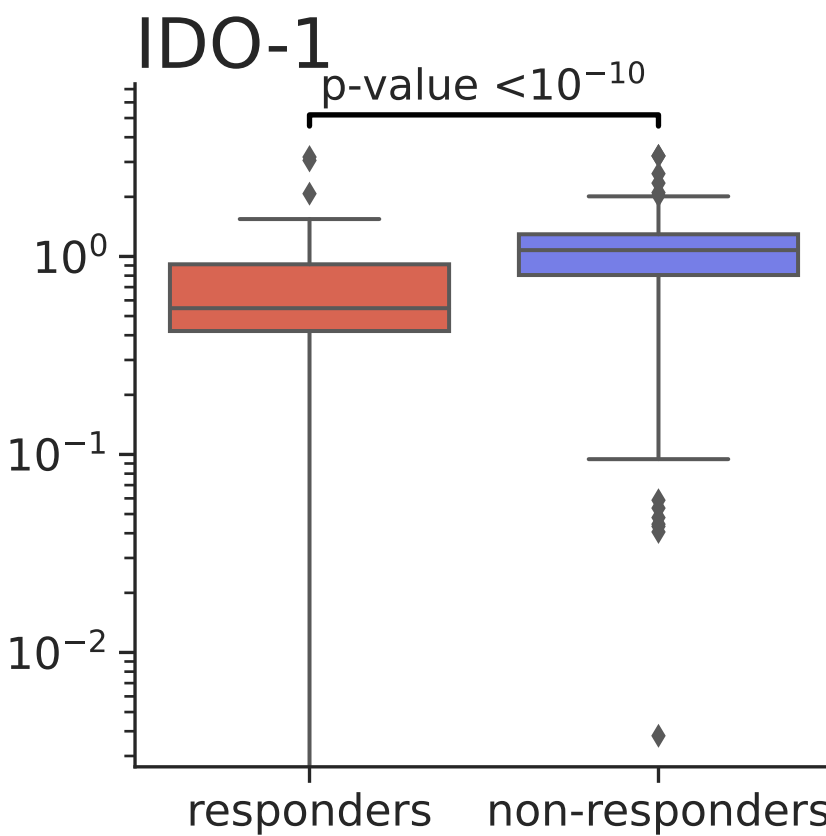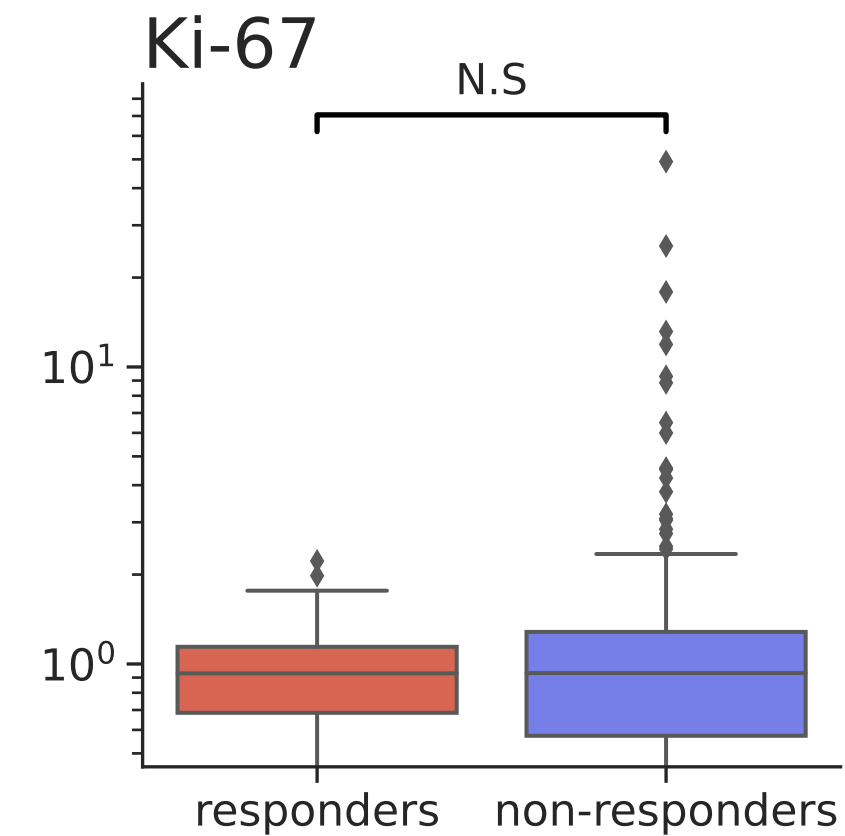

# Periphery, CD8 T-cells

### PD-1

N.S

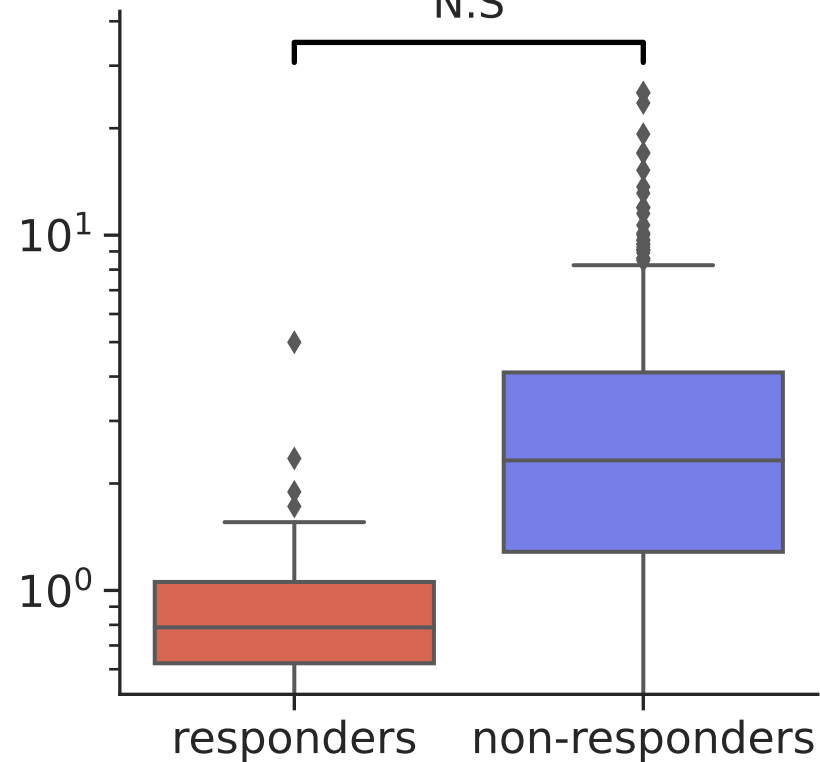

### LAG3

N.S

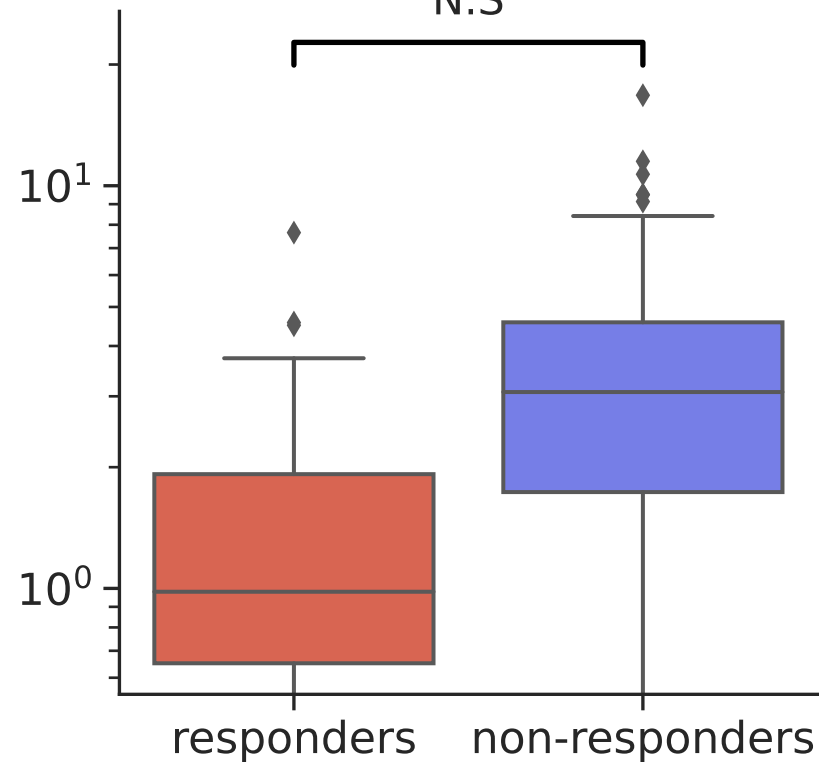

### Tim-3

N.S

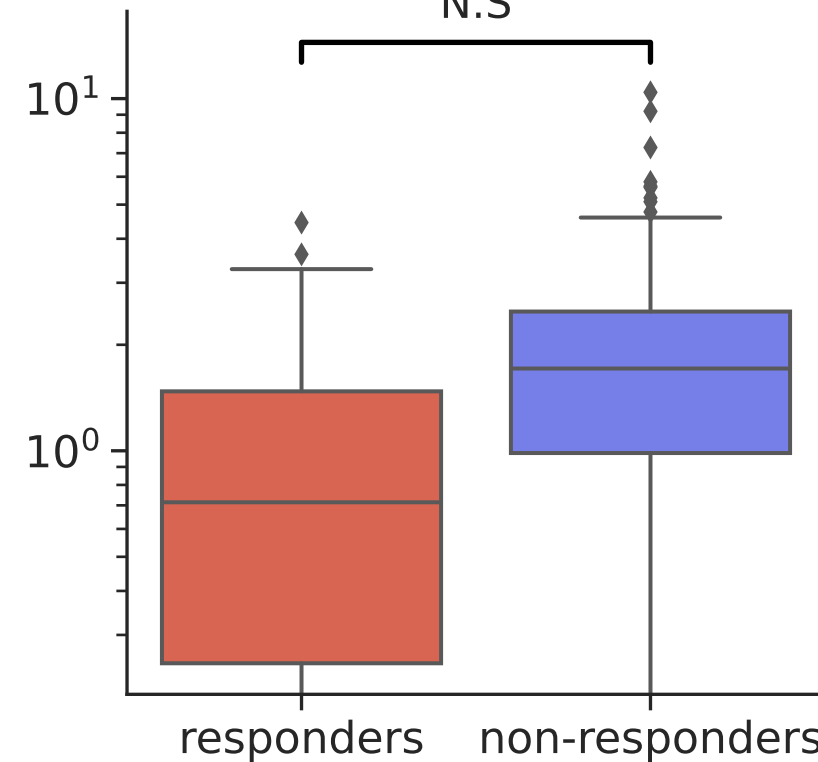

### VISTA

N.S

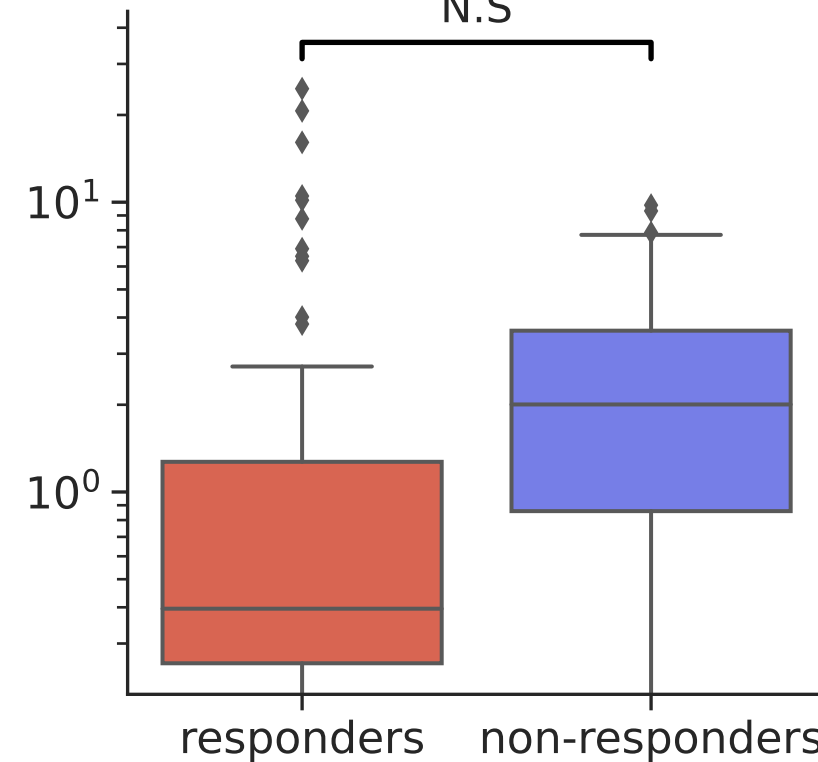

### CD45RA

p-value < 10<sup>-2</sup>

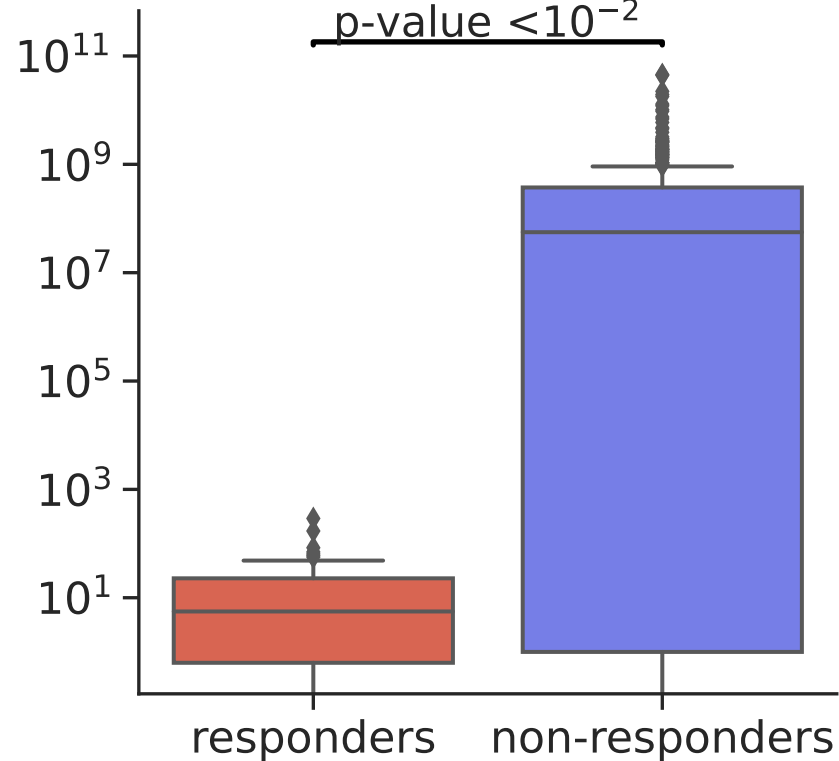

### CD45RO

N.S

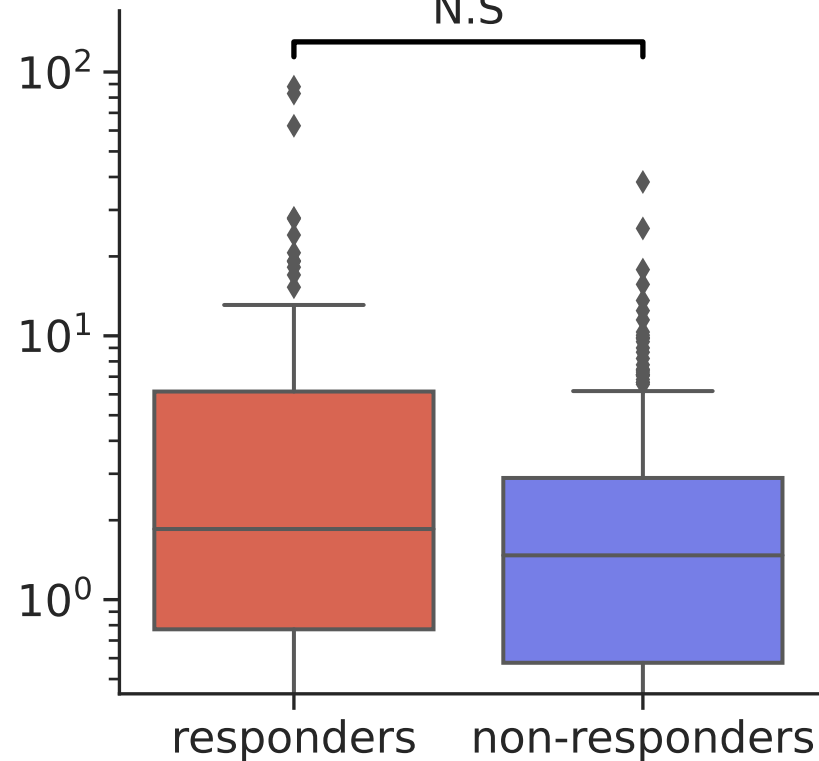

### IDO-1

p-value < 10<sup>-2</sup>

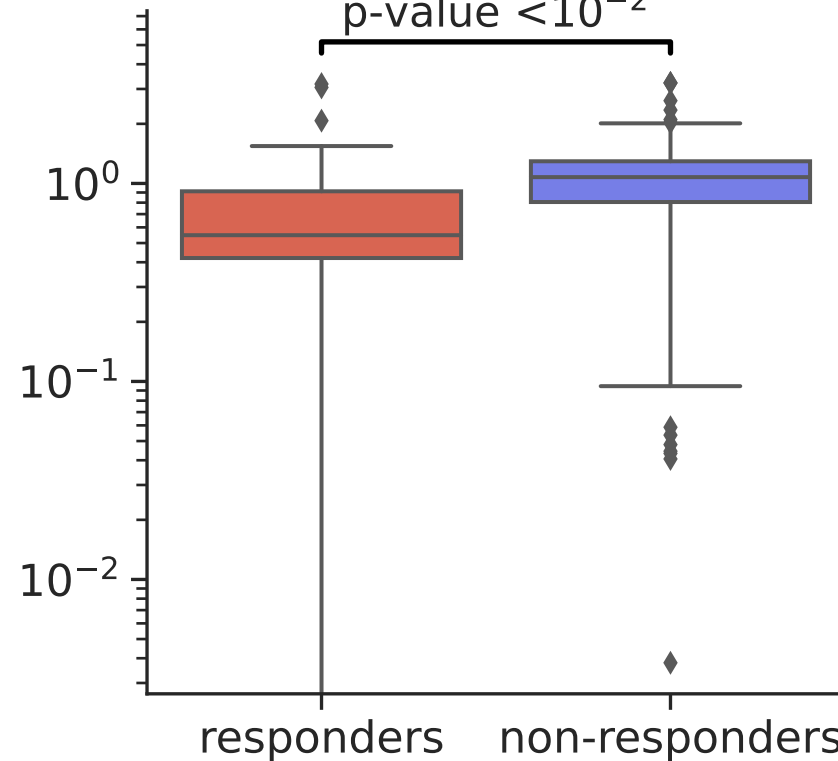

### Ki-67

N.S

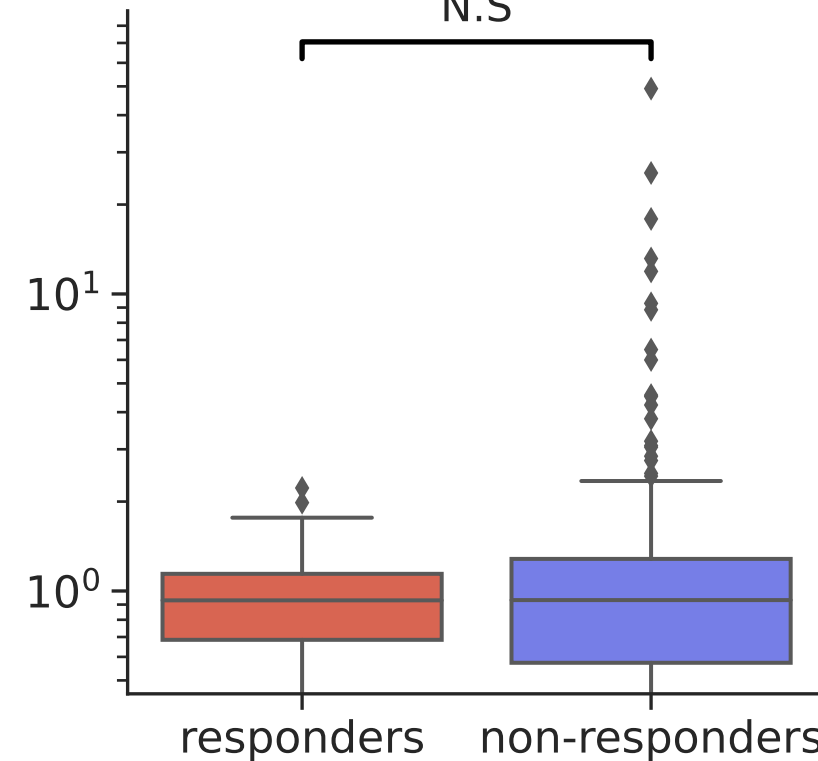

# Center, Lymphocytes

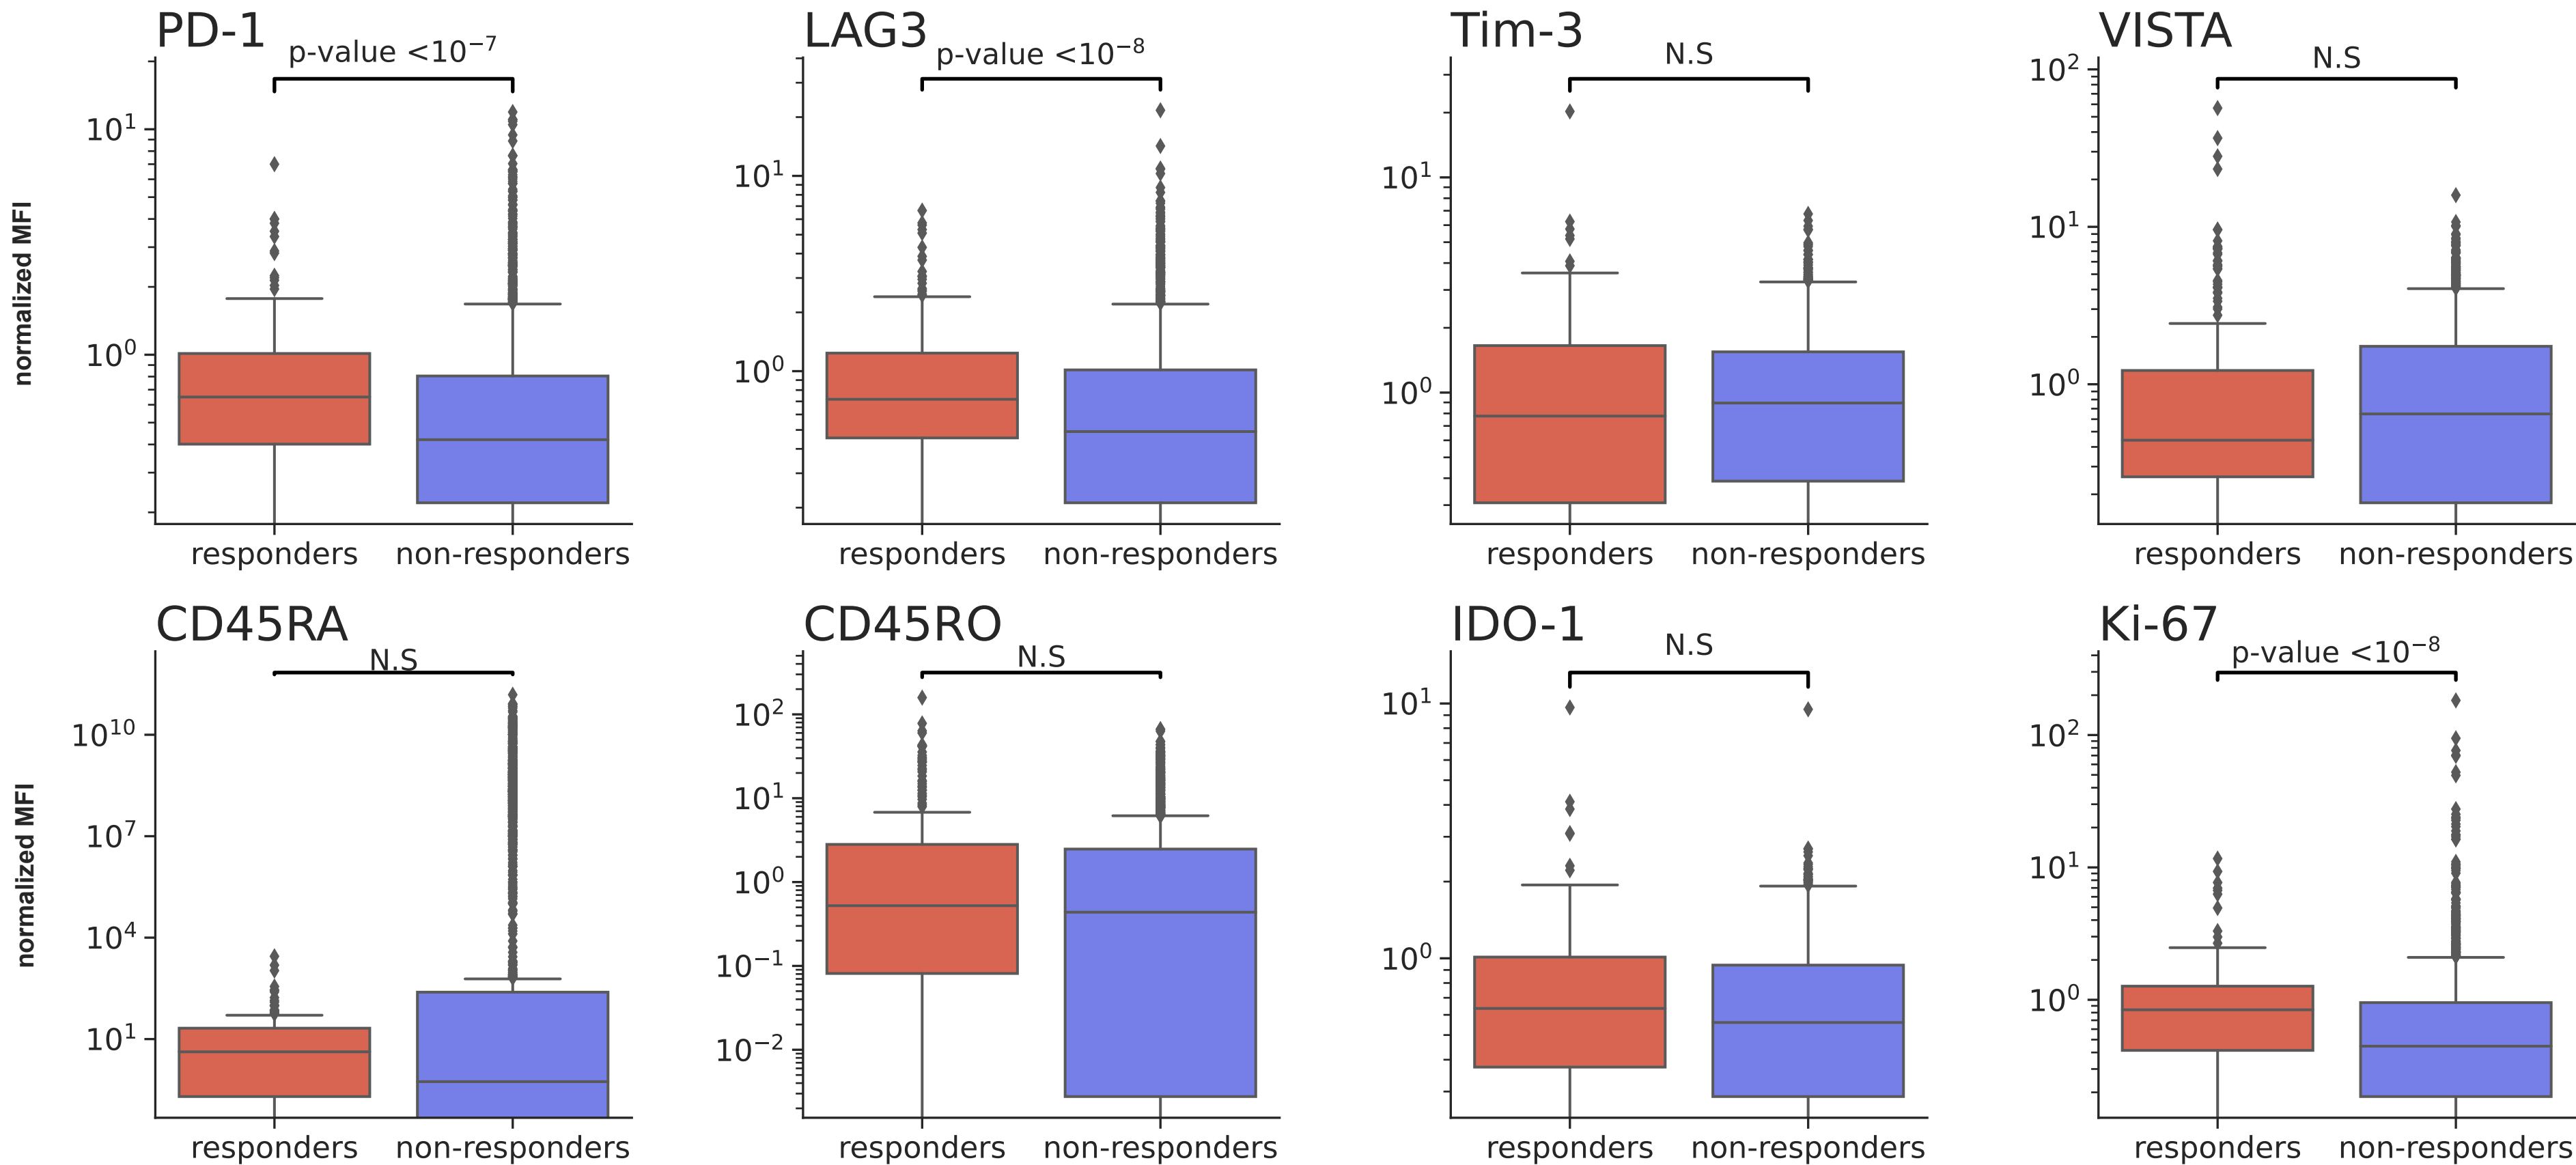

# Periphery, Lymphocytes

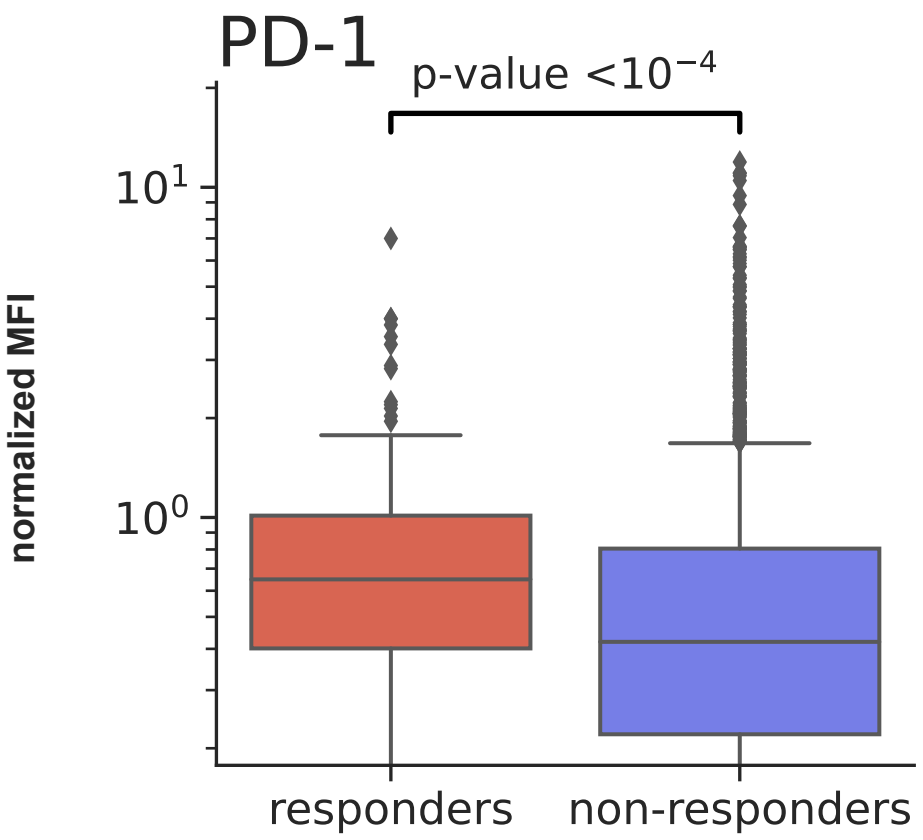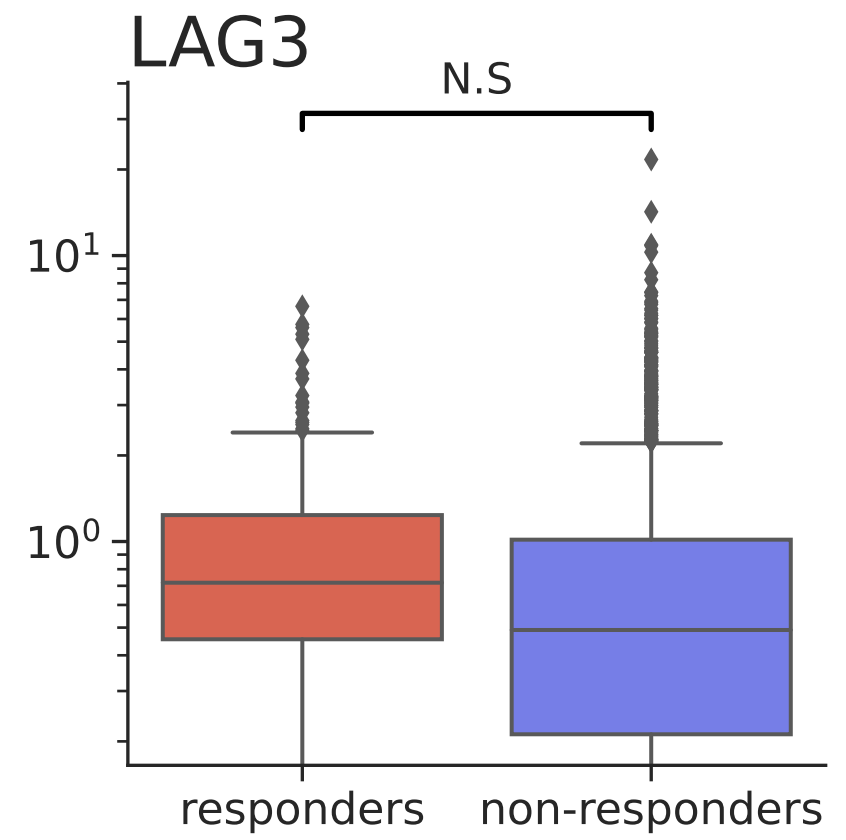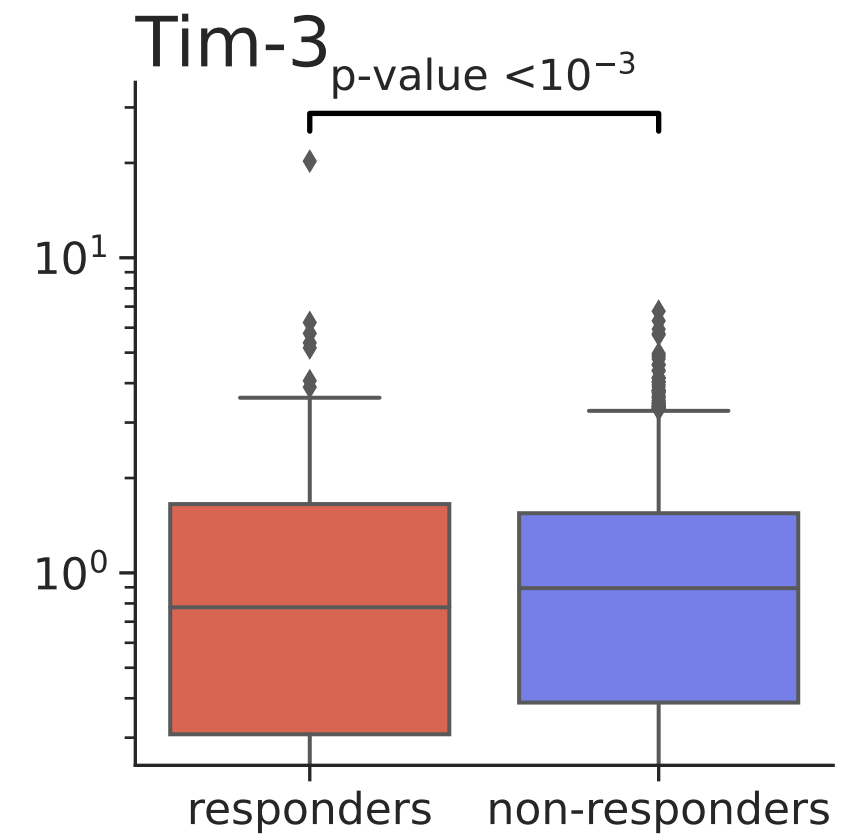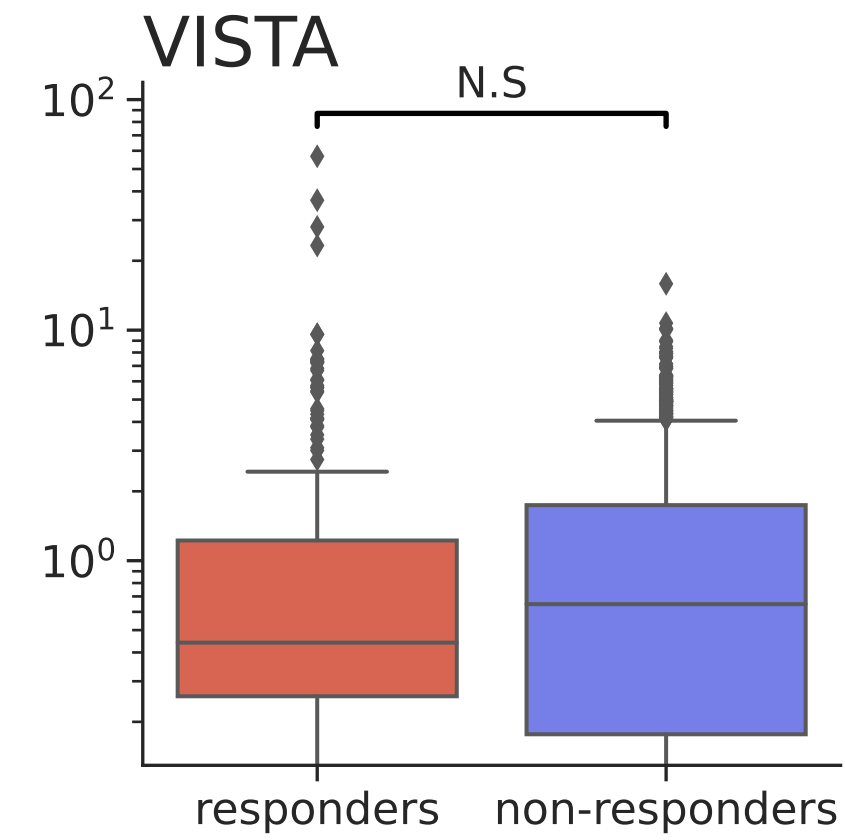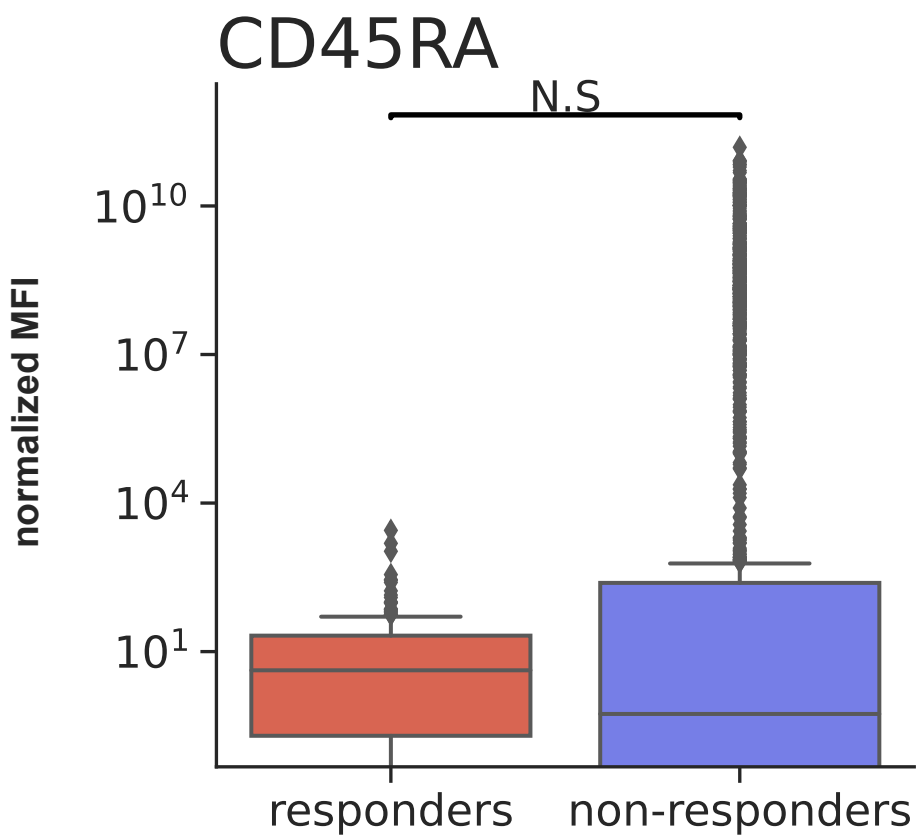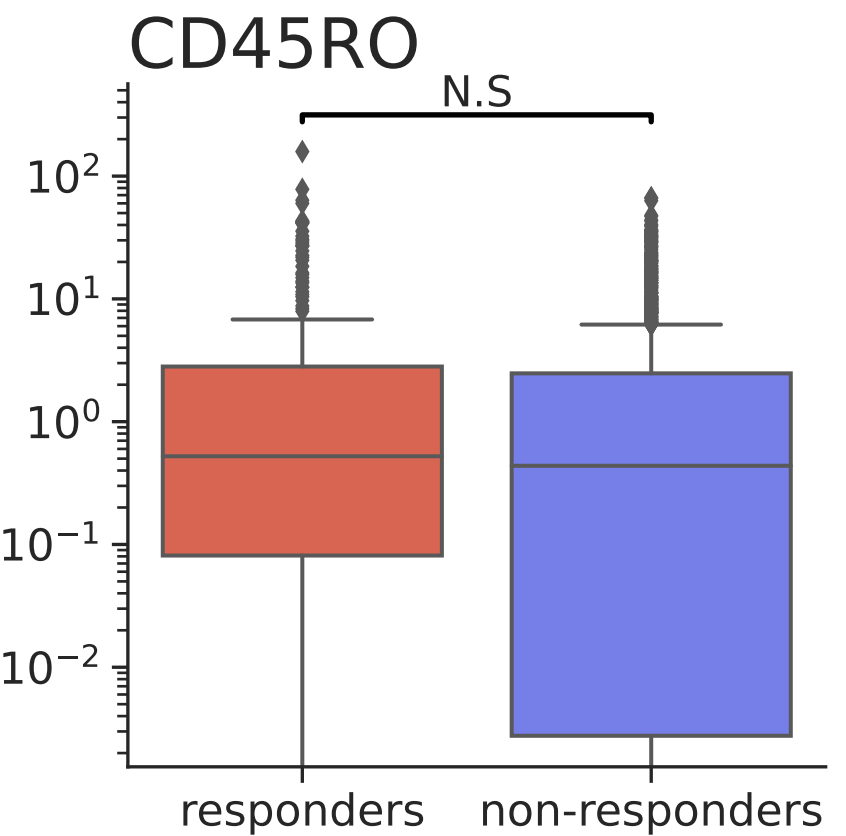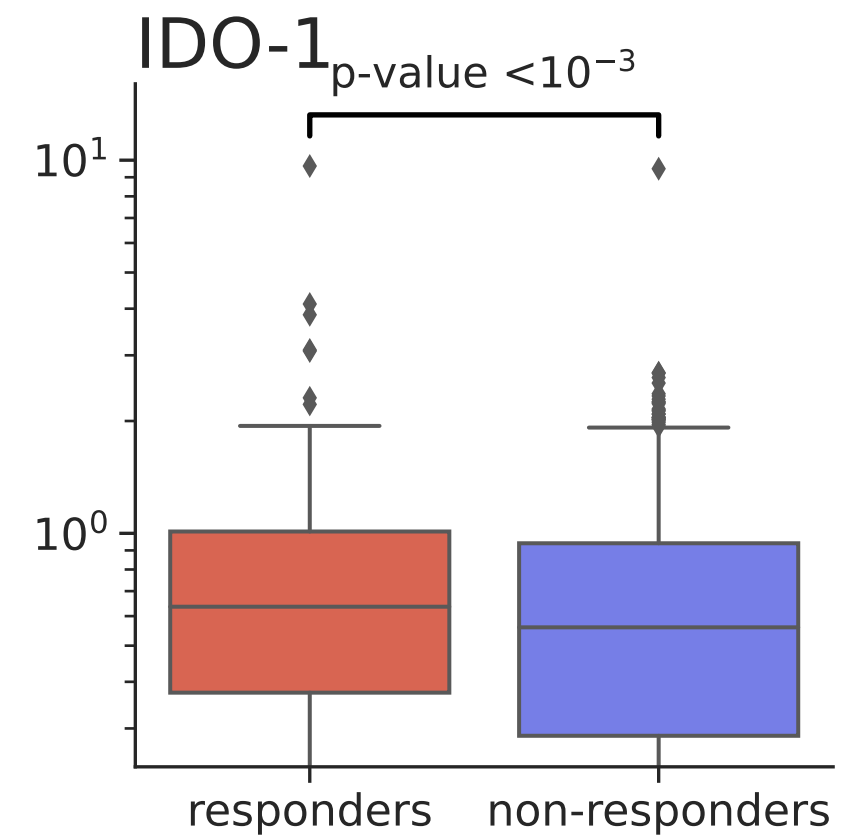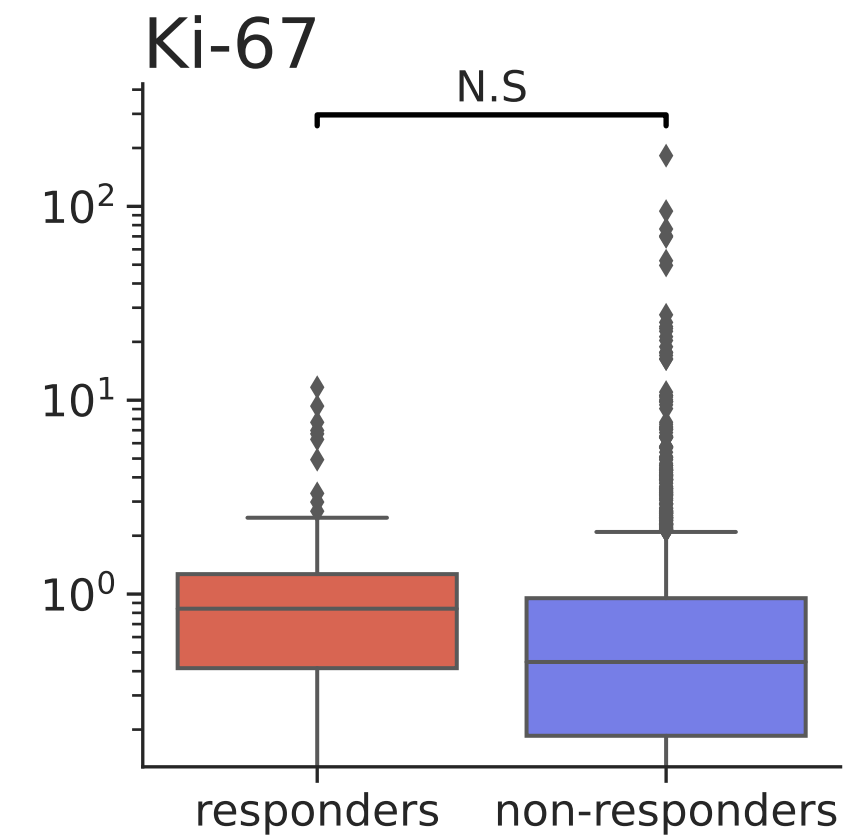

# Center, M1 macrophages

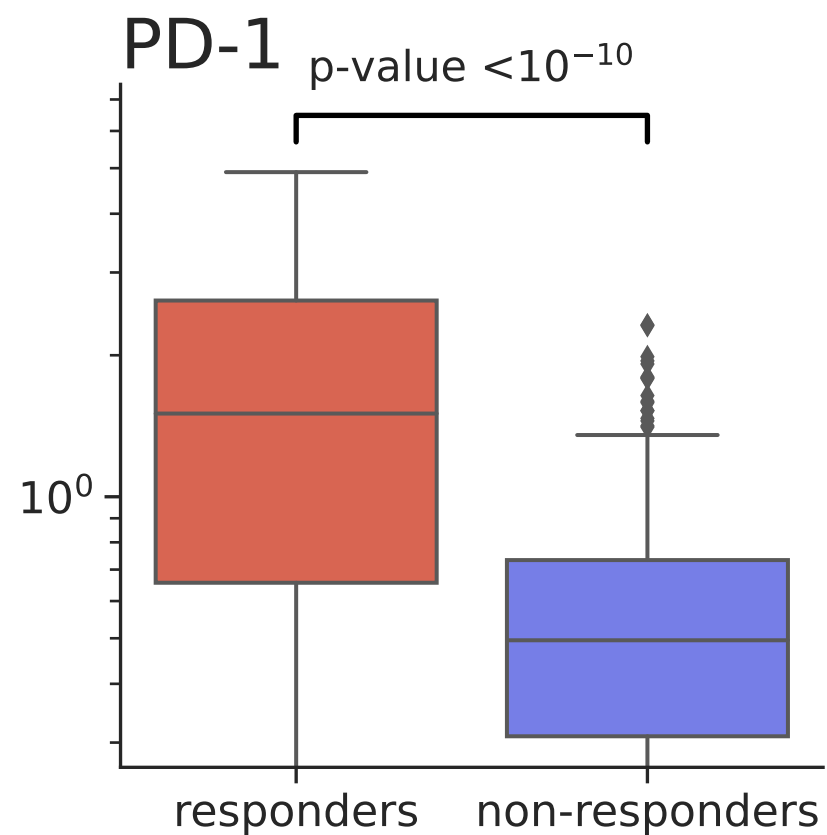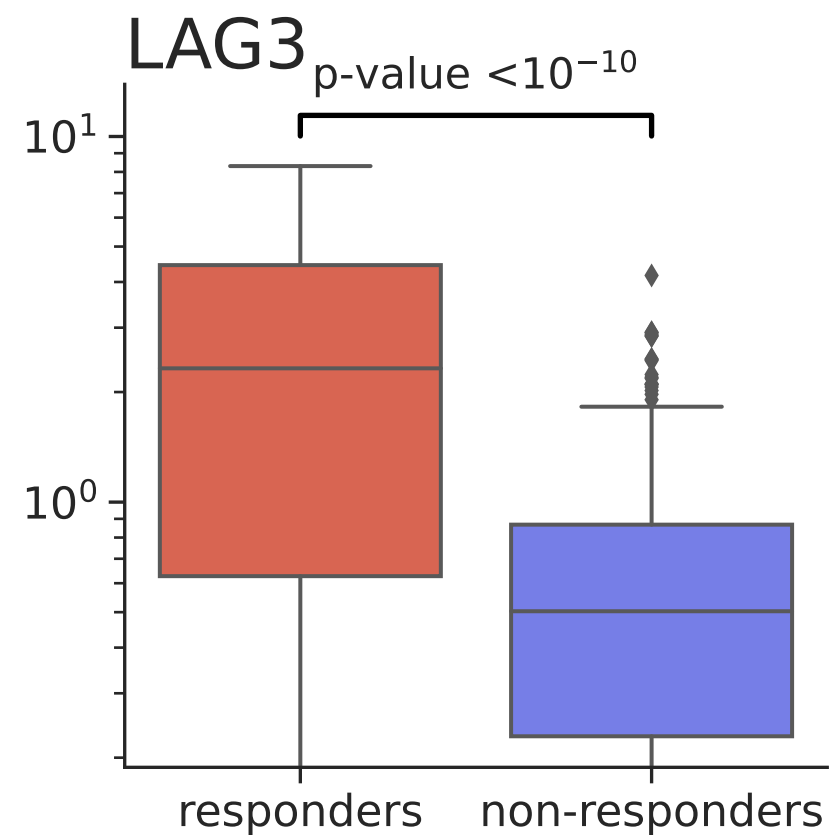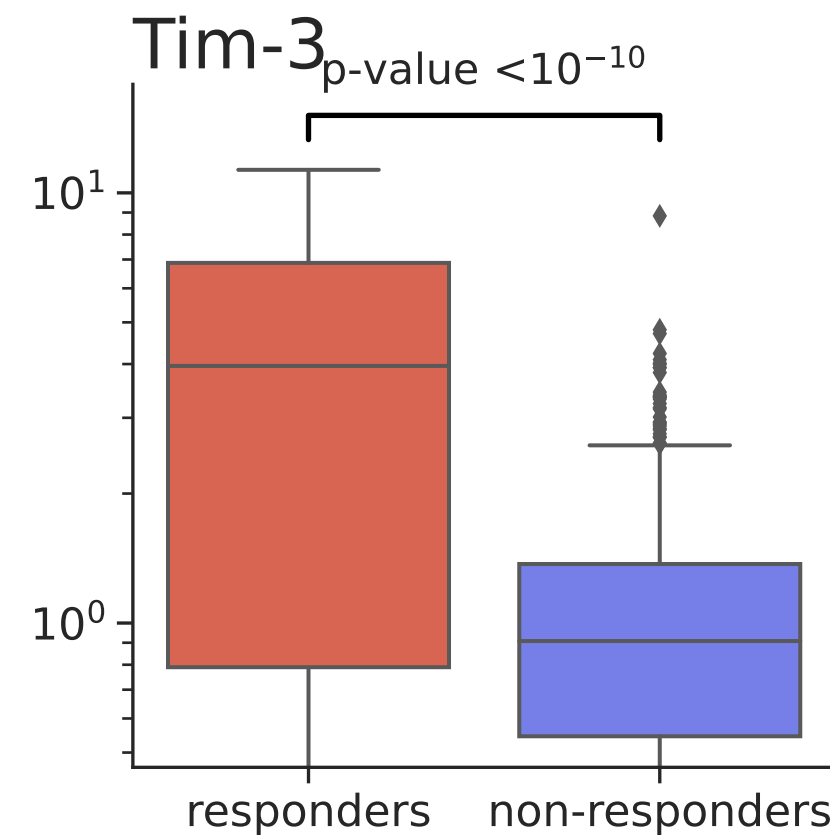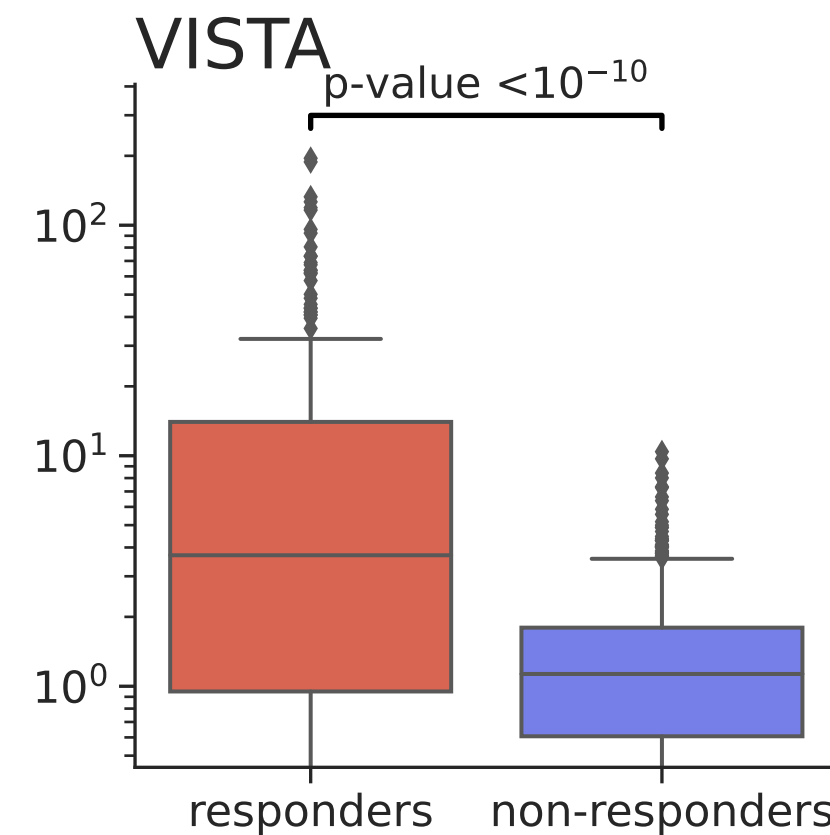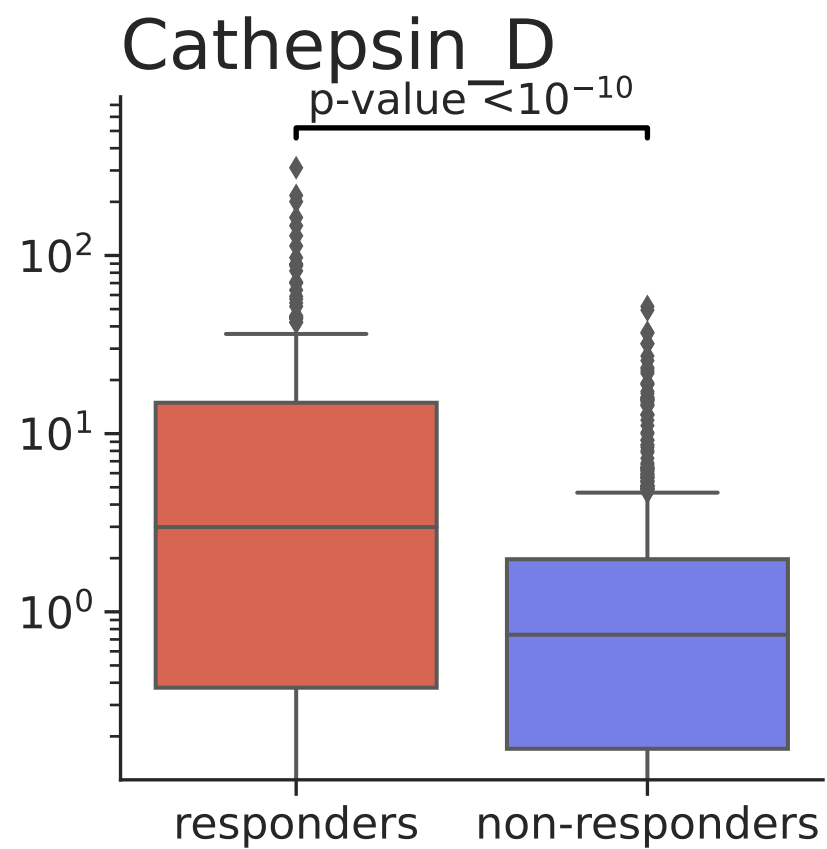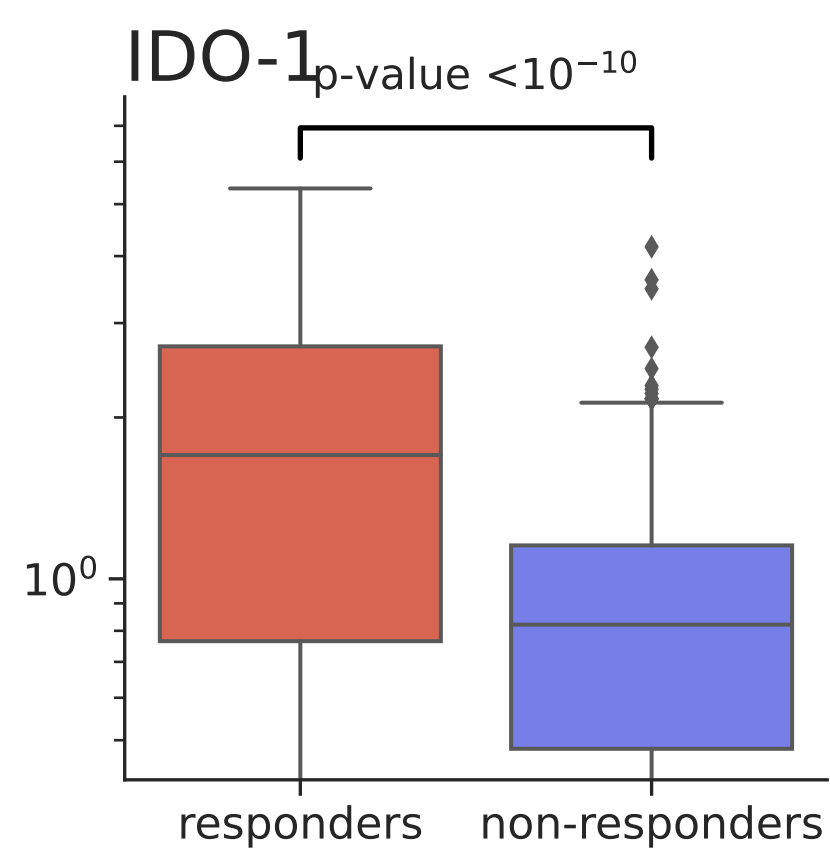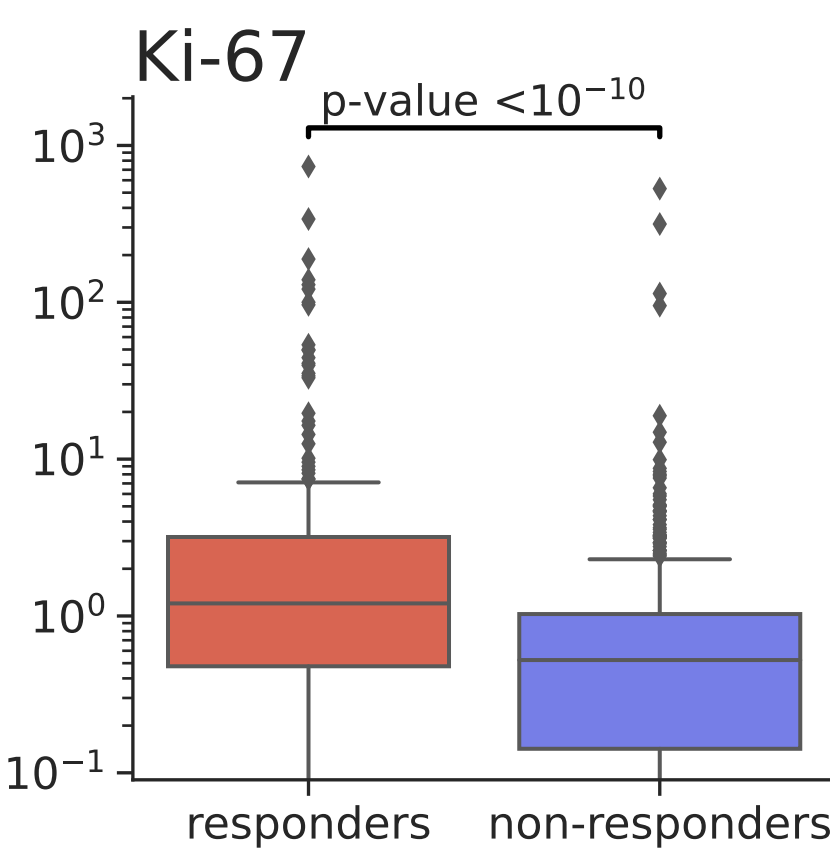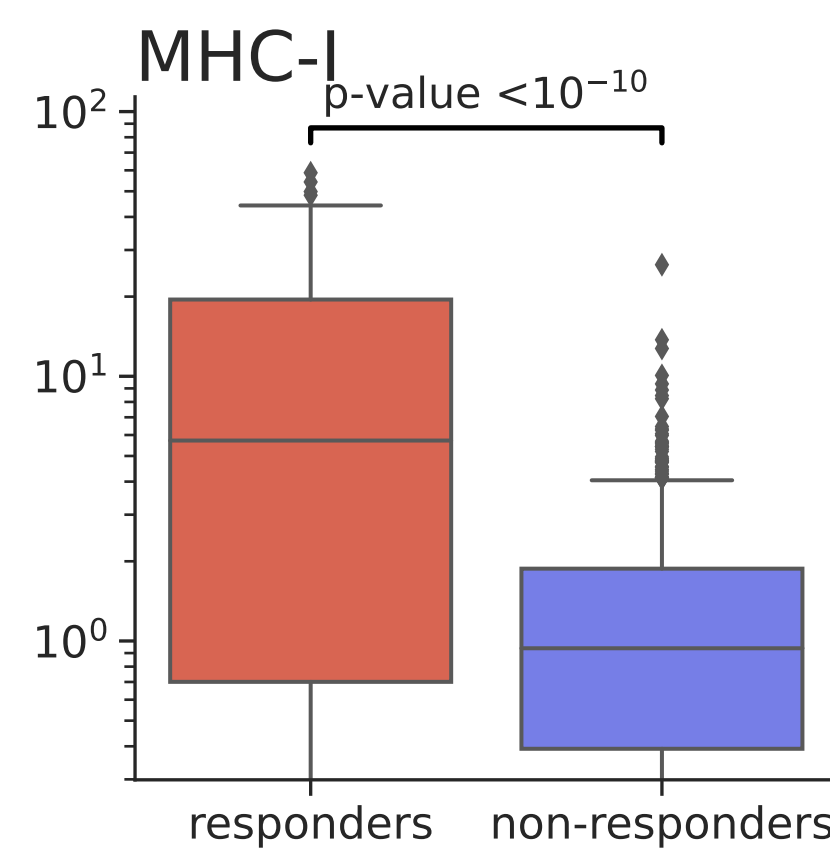



# Periphery, M1 macrophages

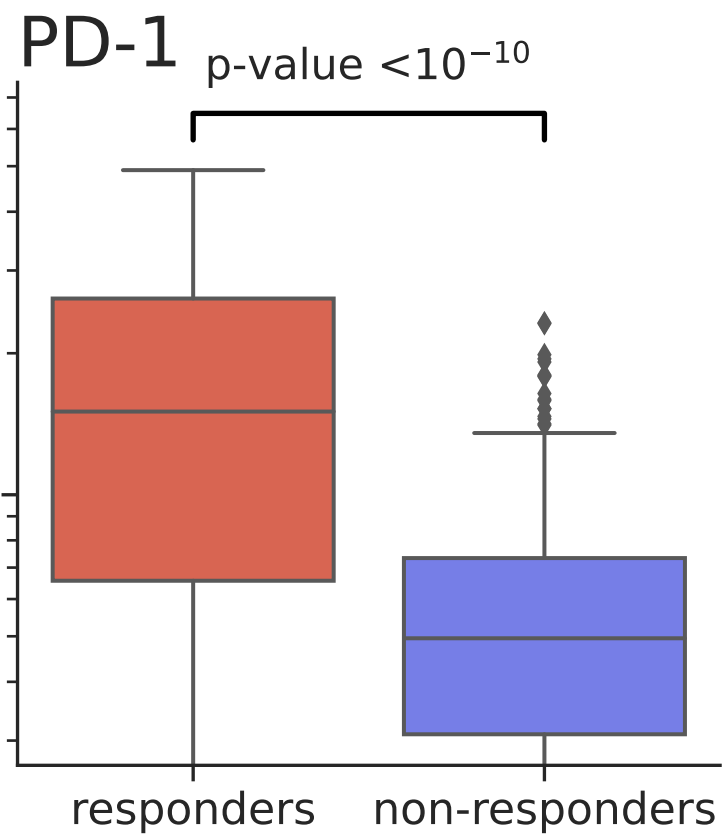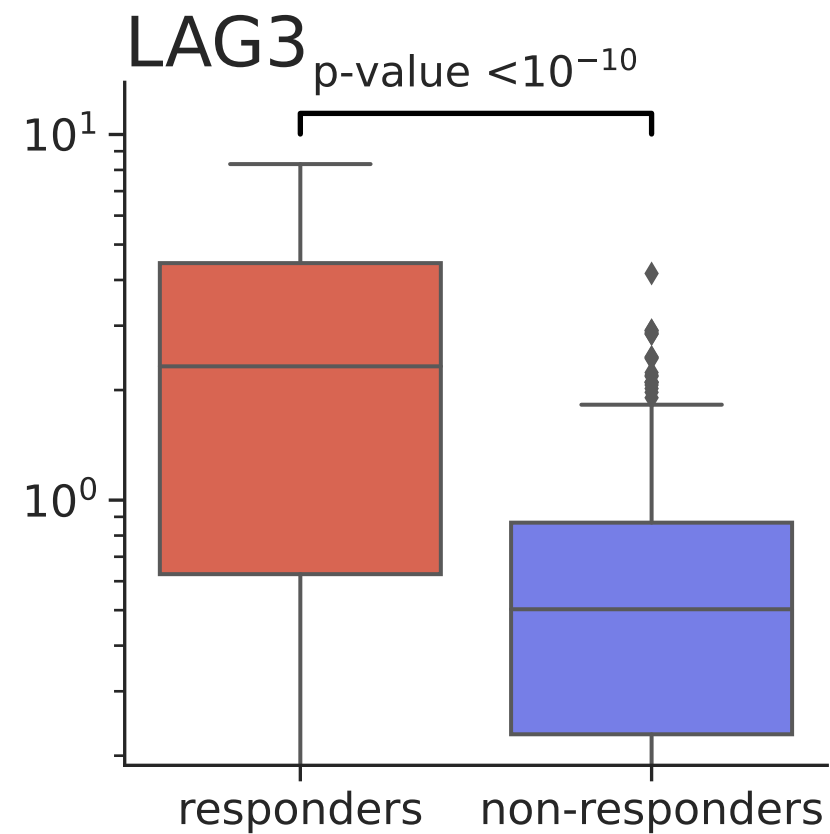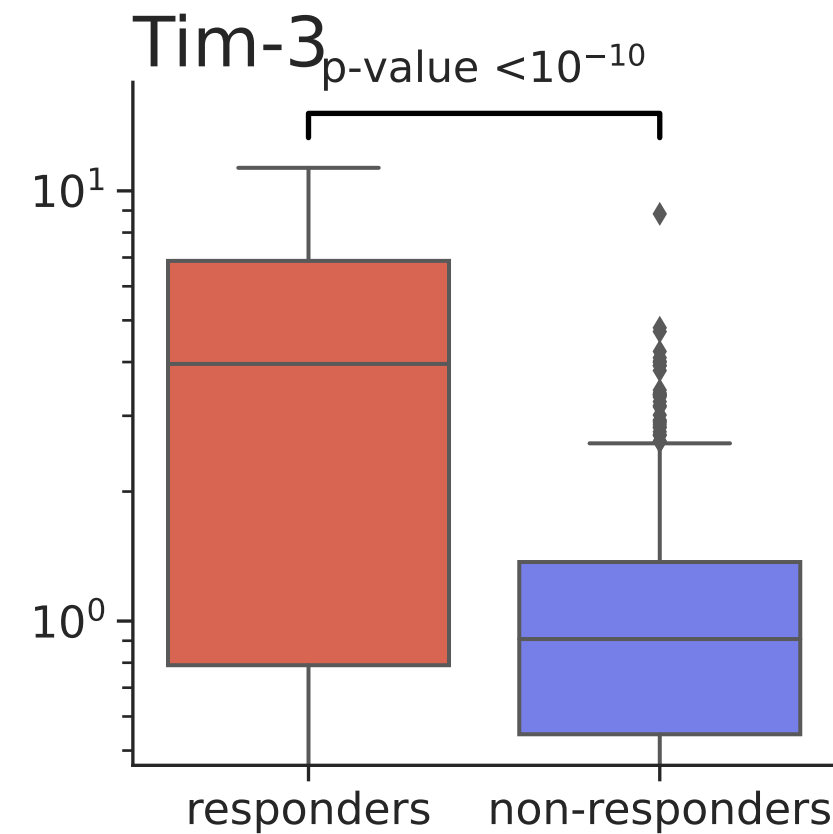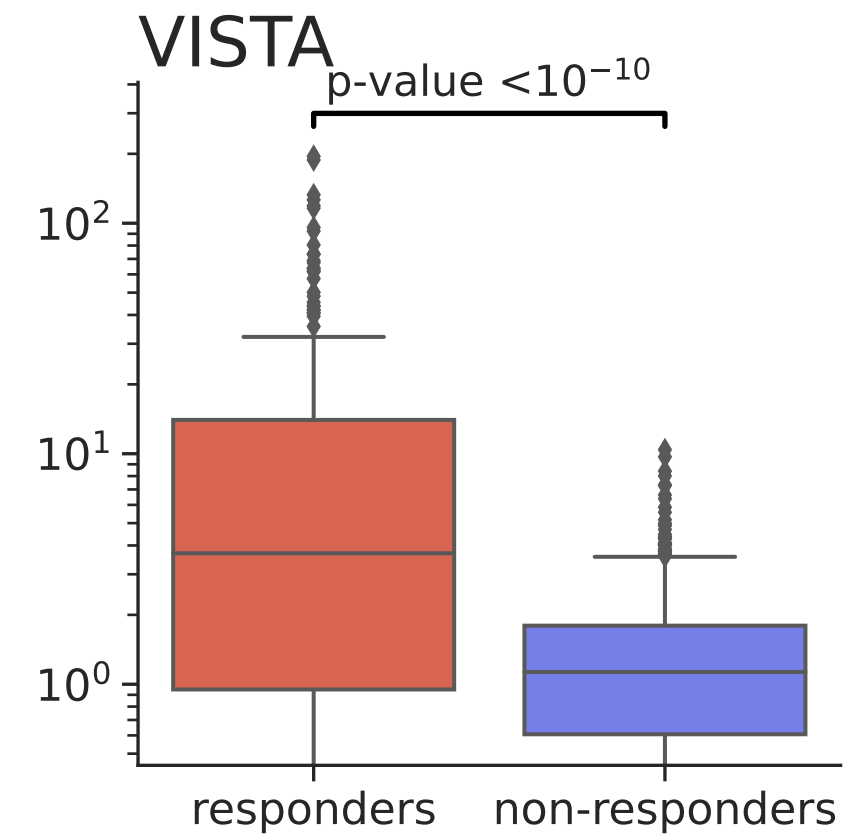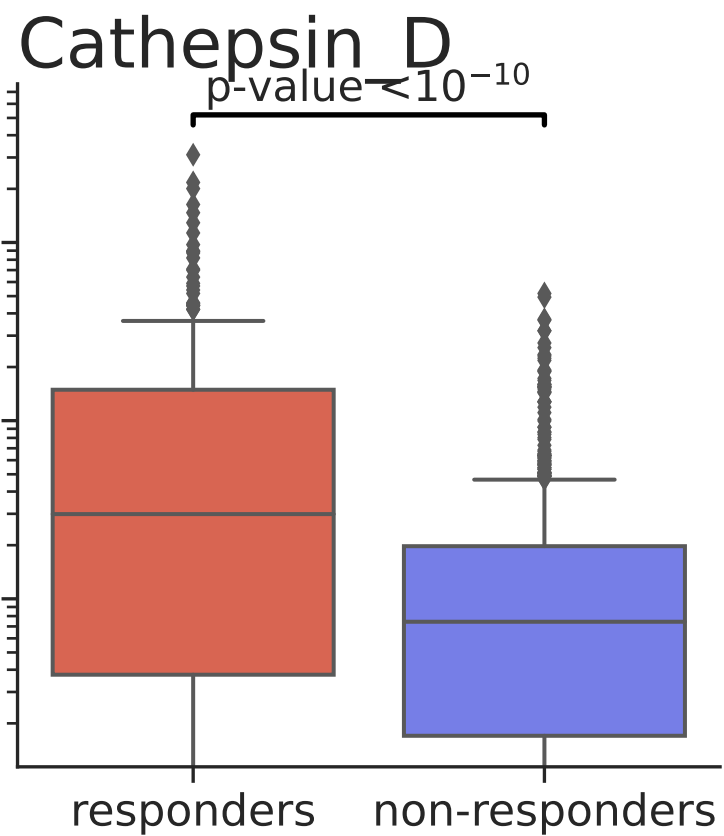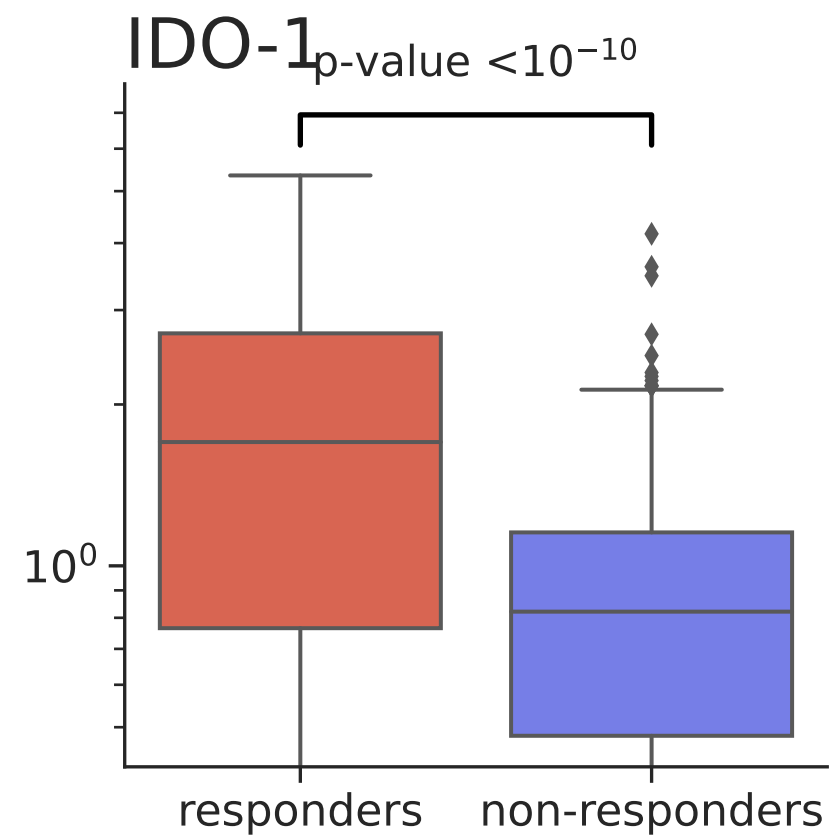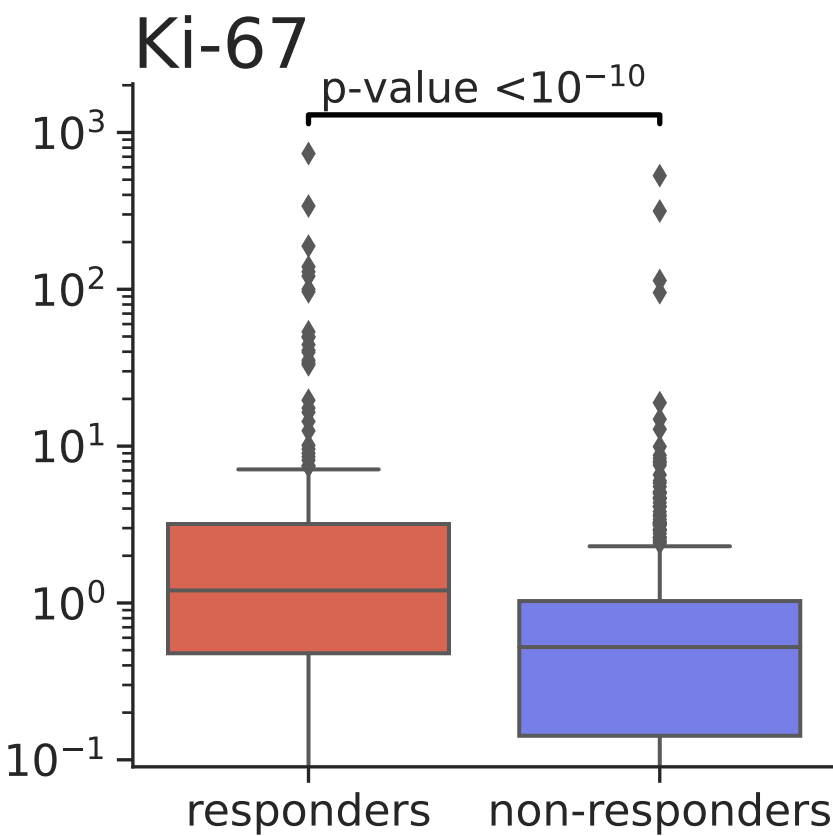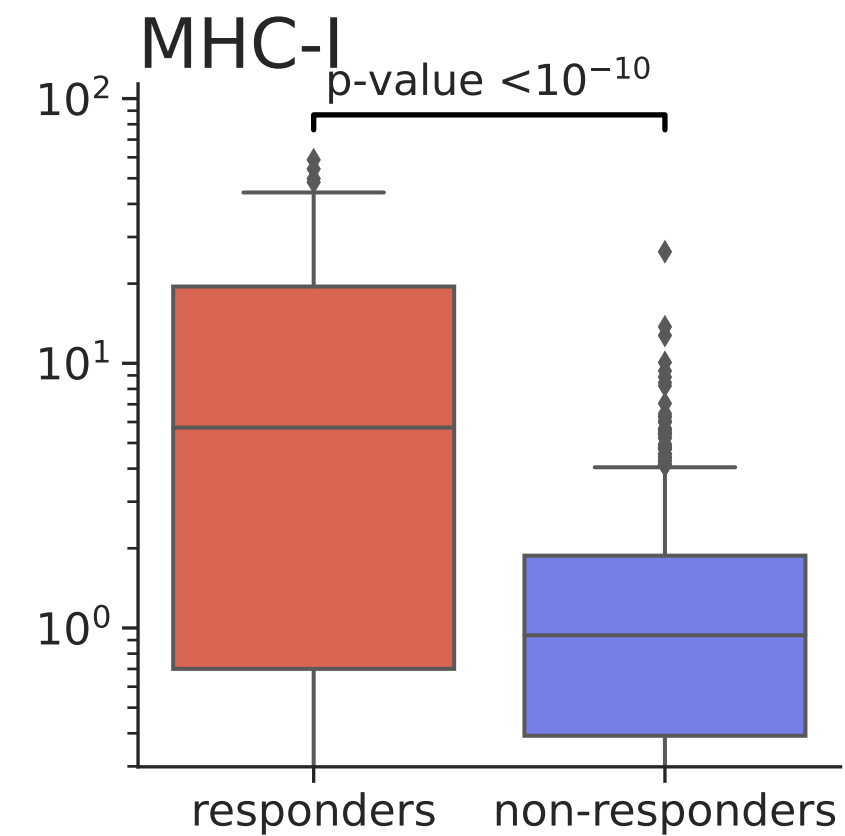

# Center, M2-like microglia

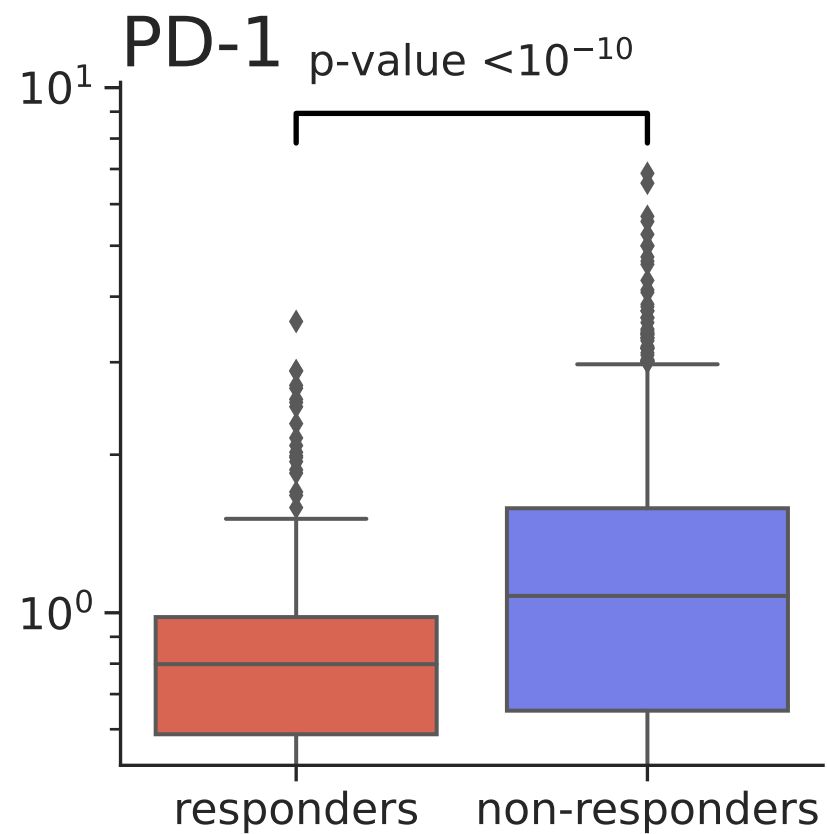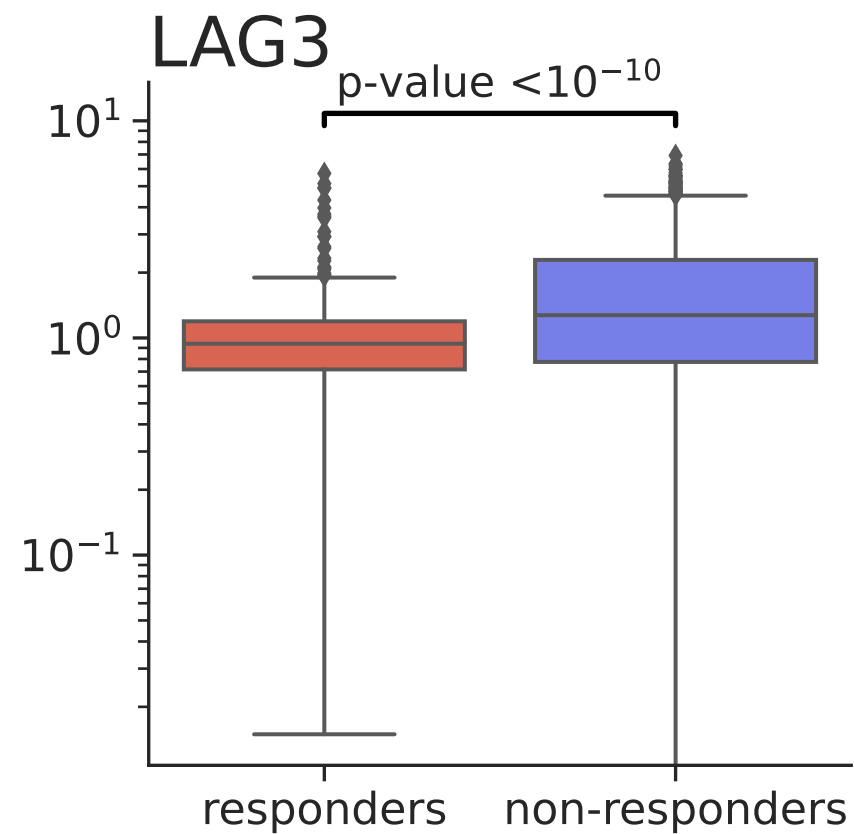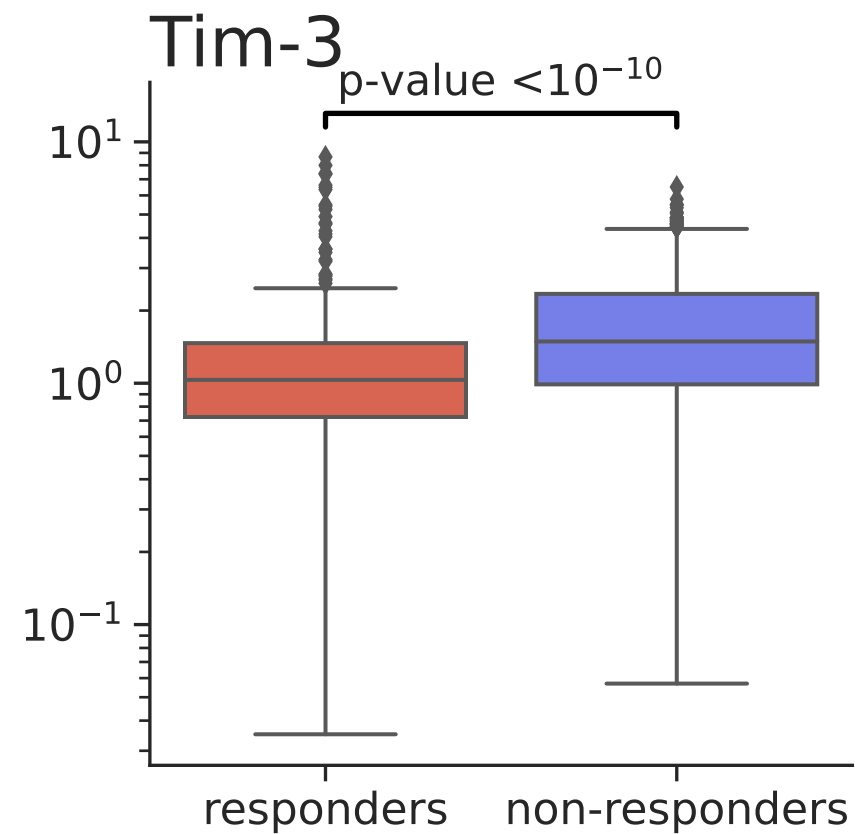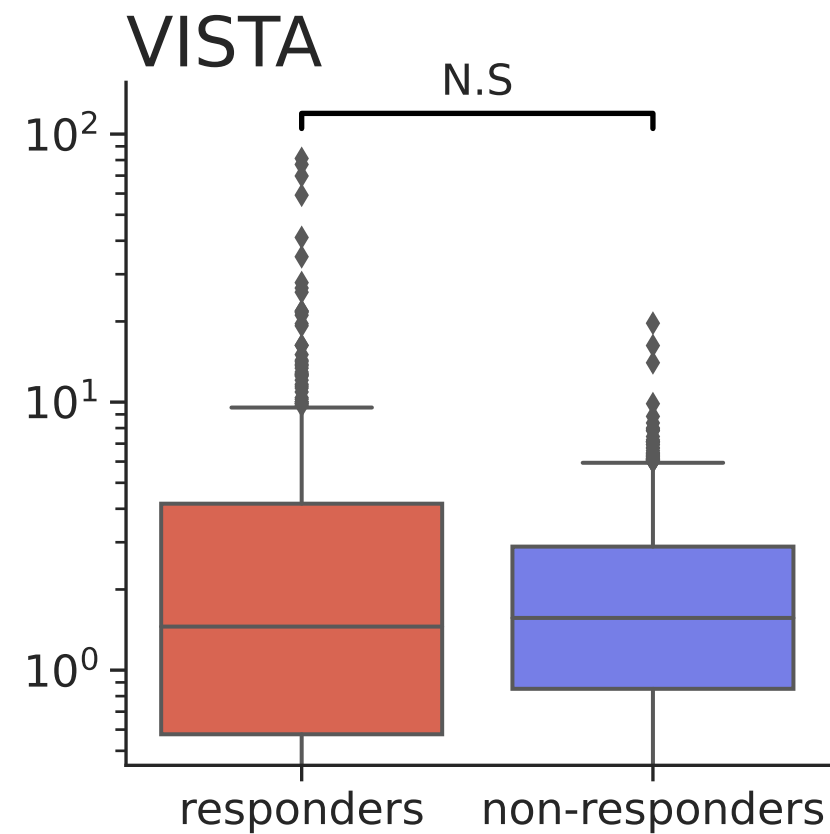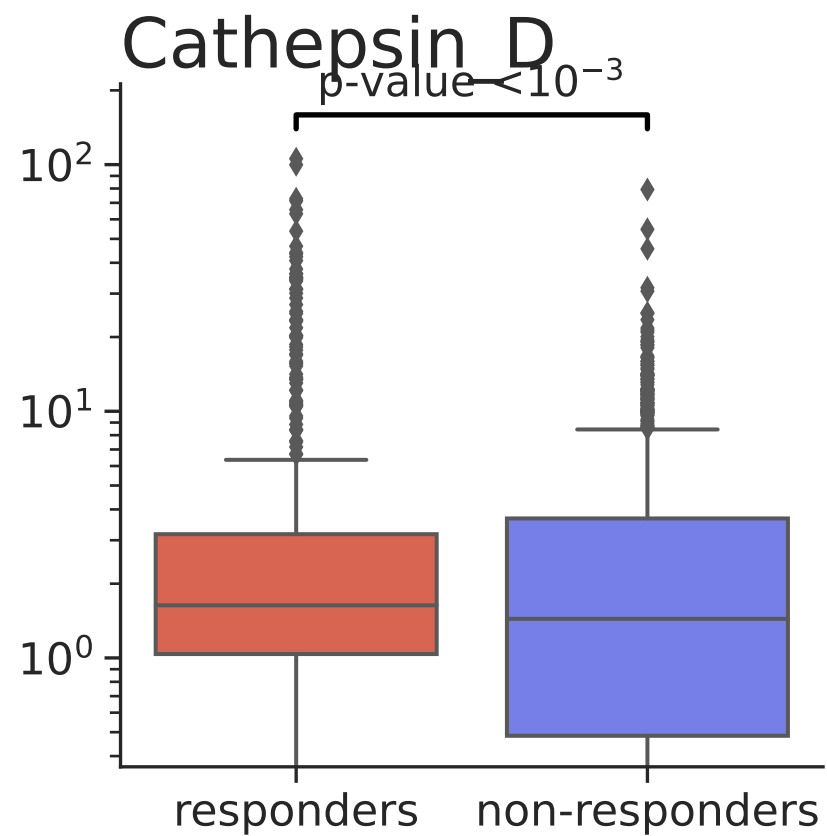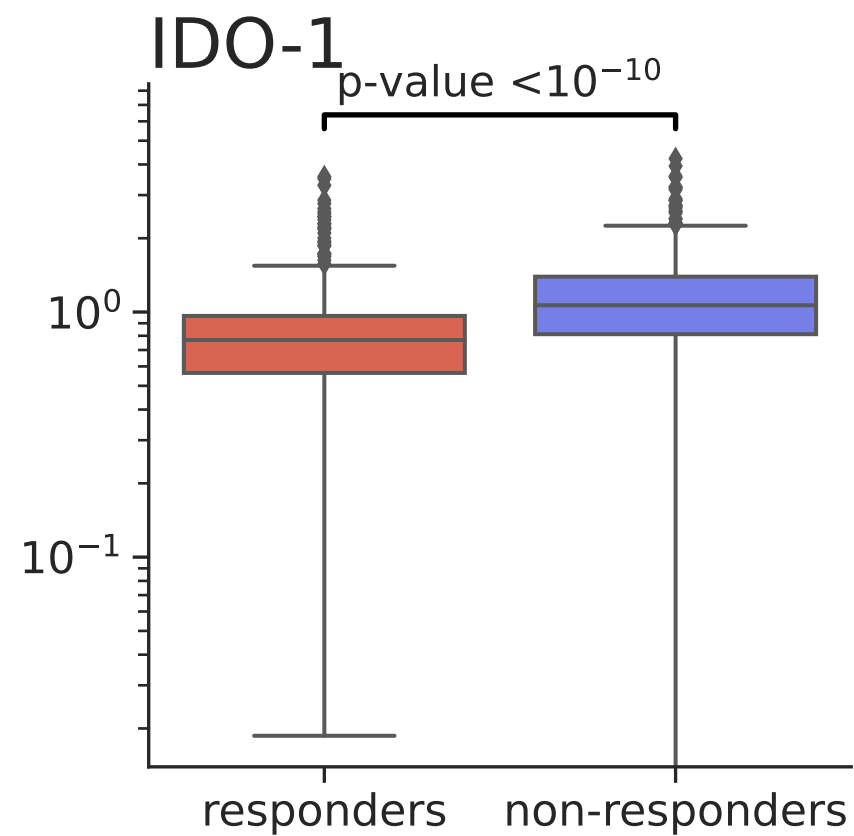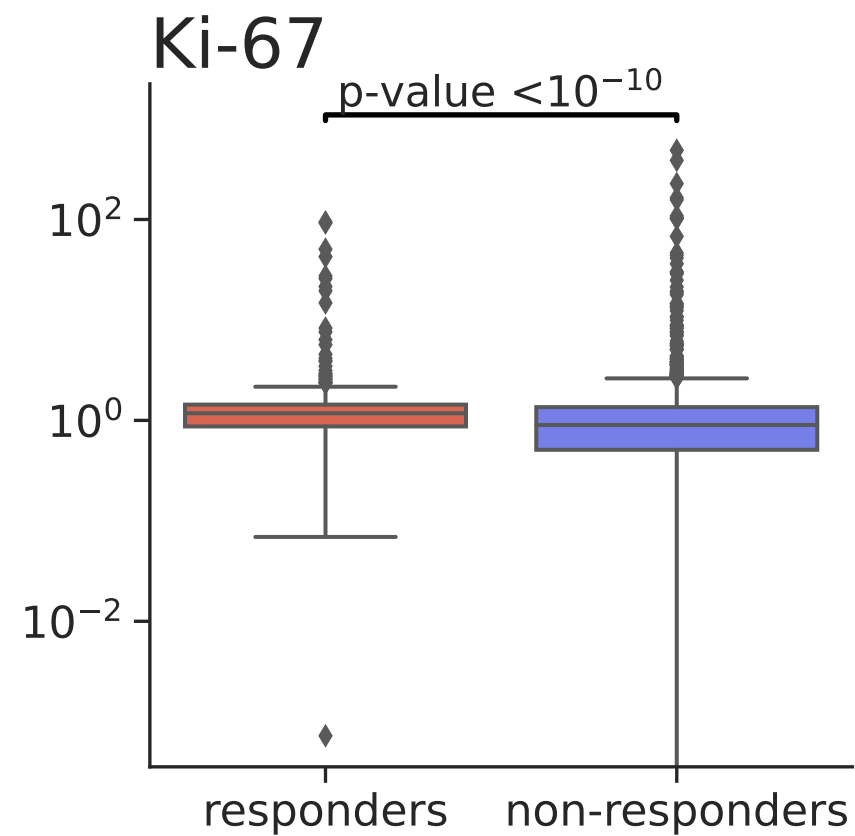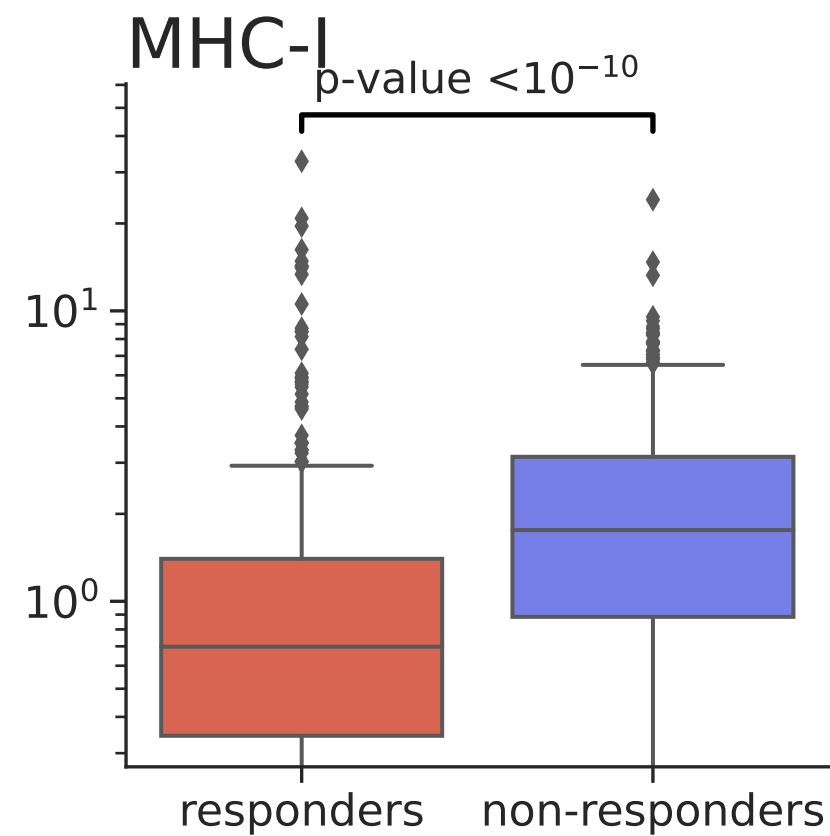

# Periphery, M2-like microglia

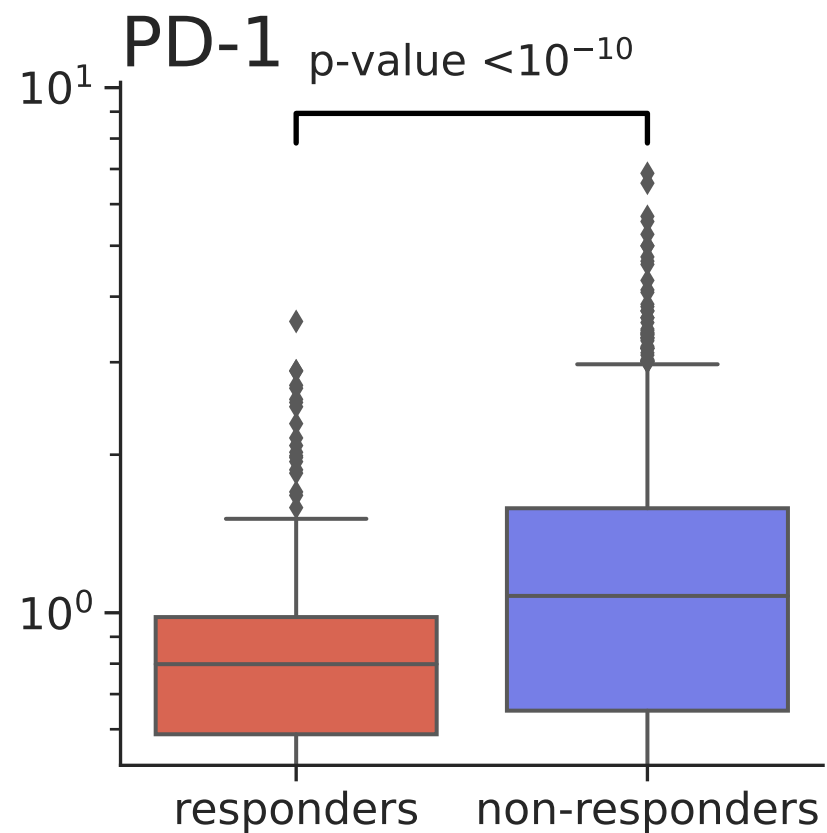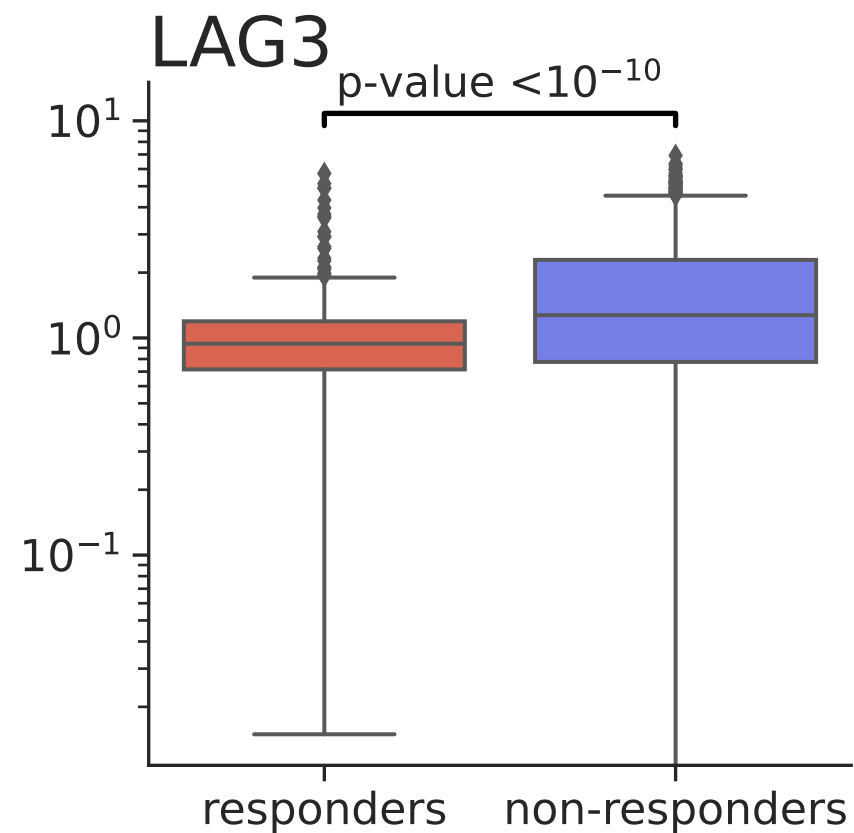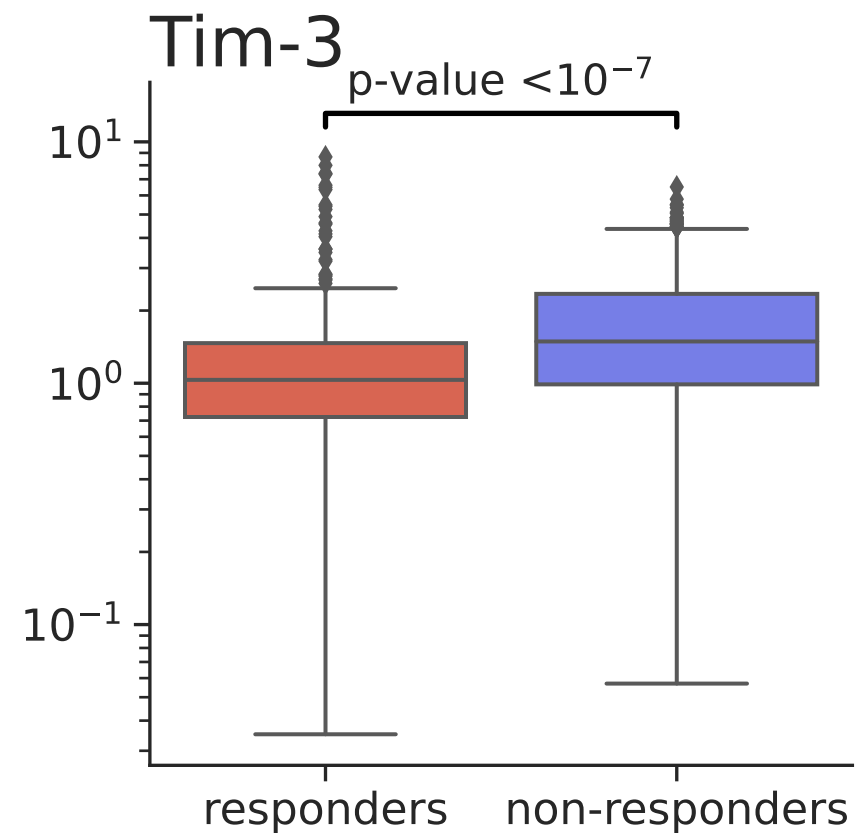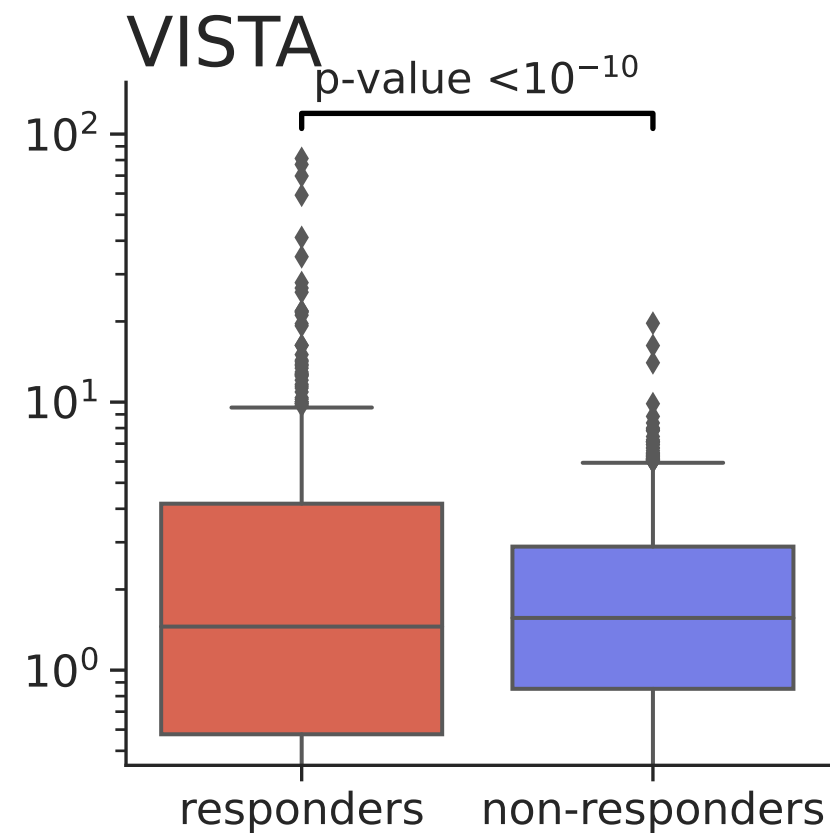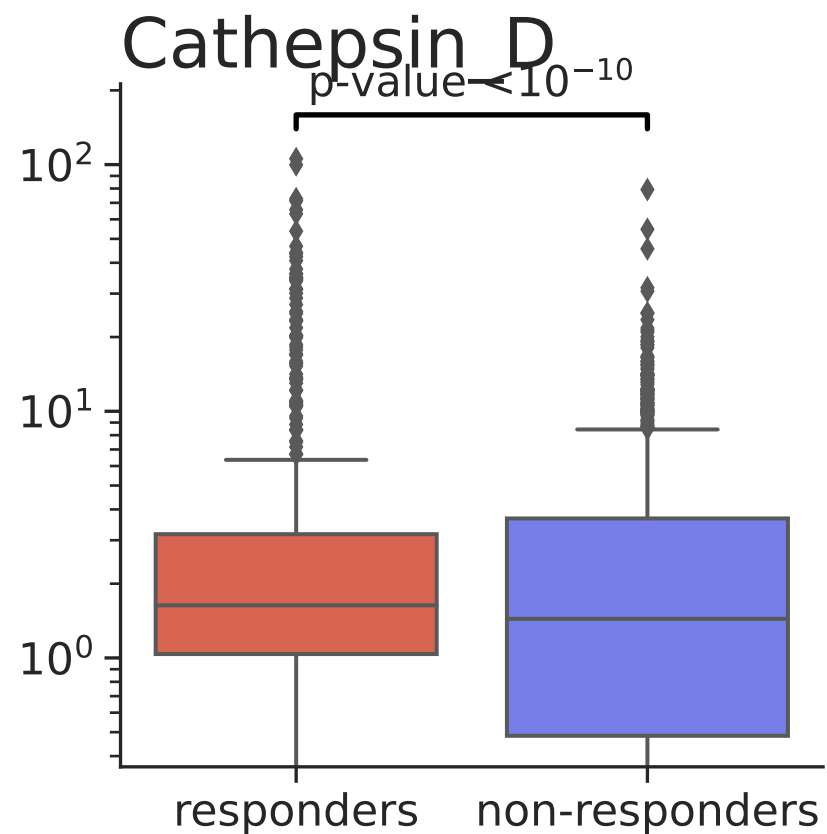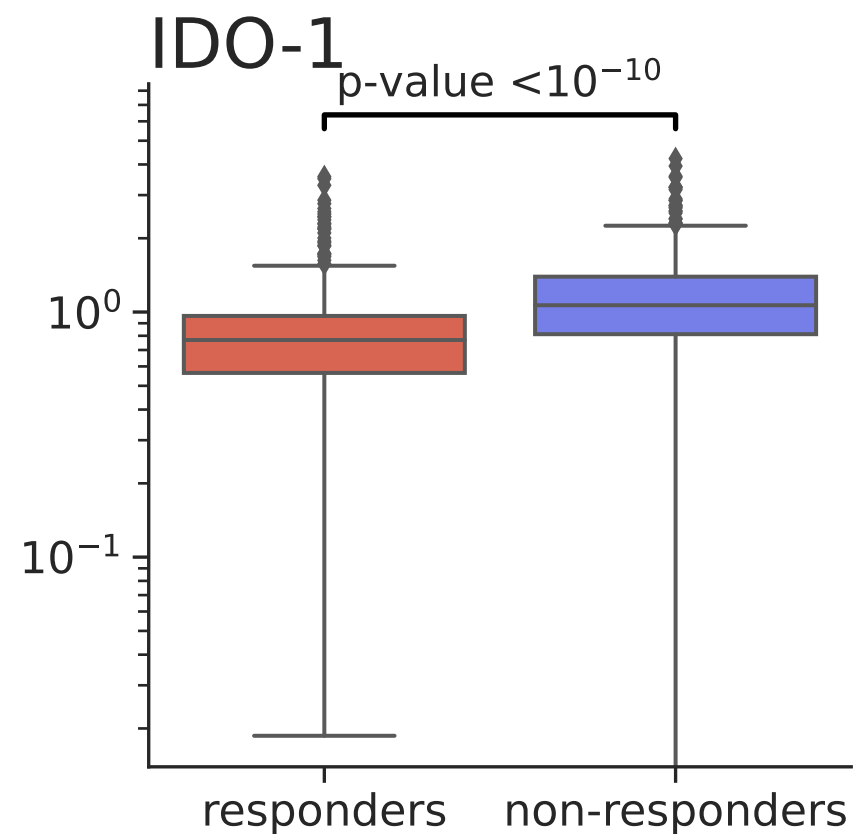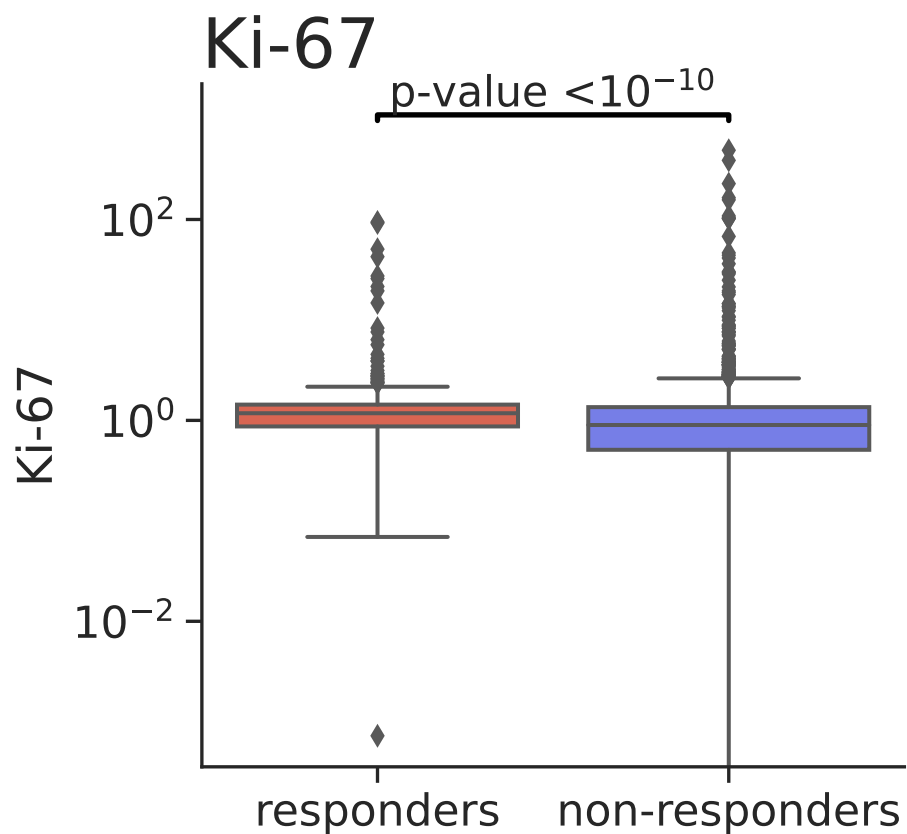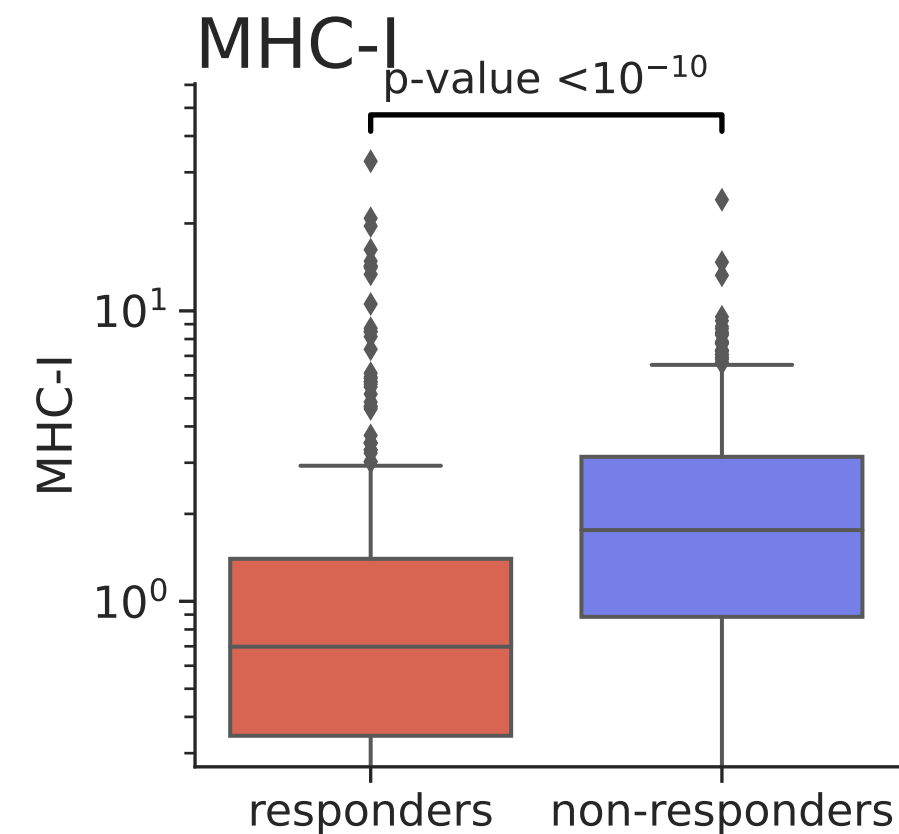

# Center, M2 macrophages

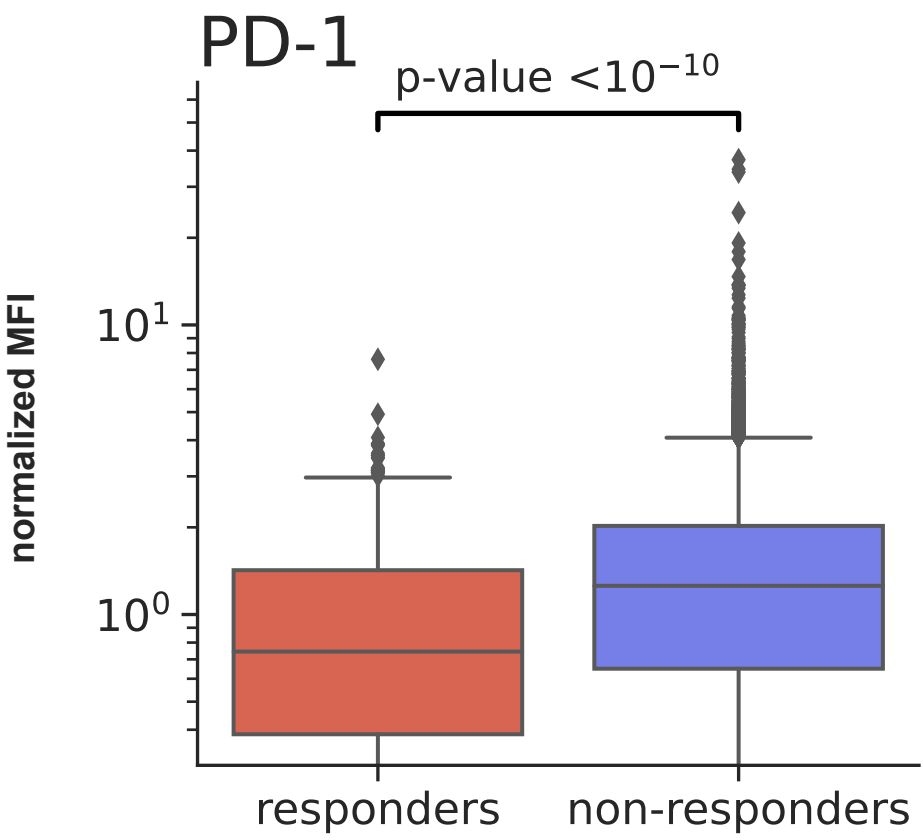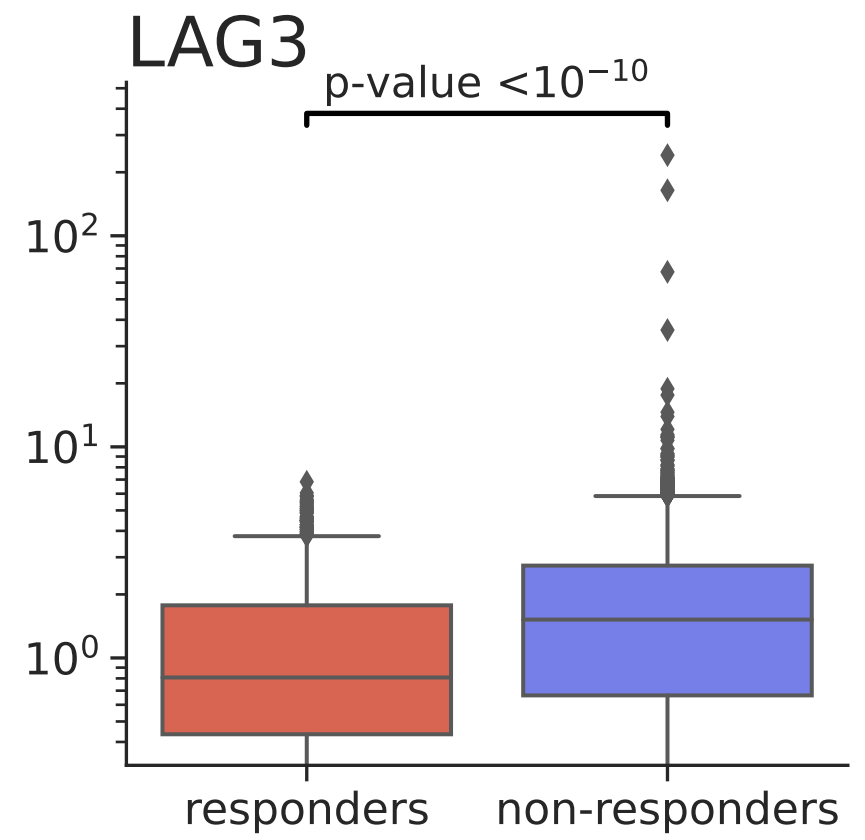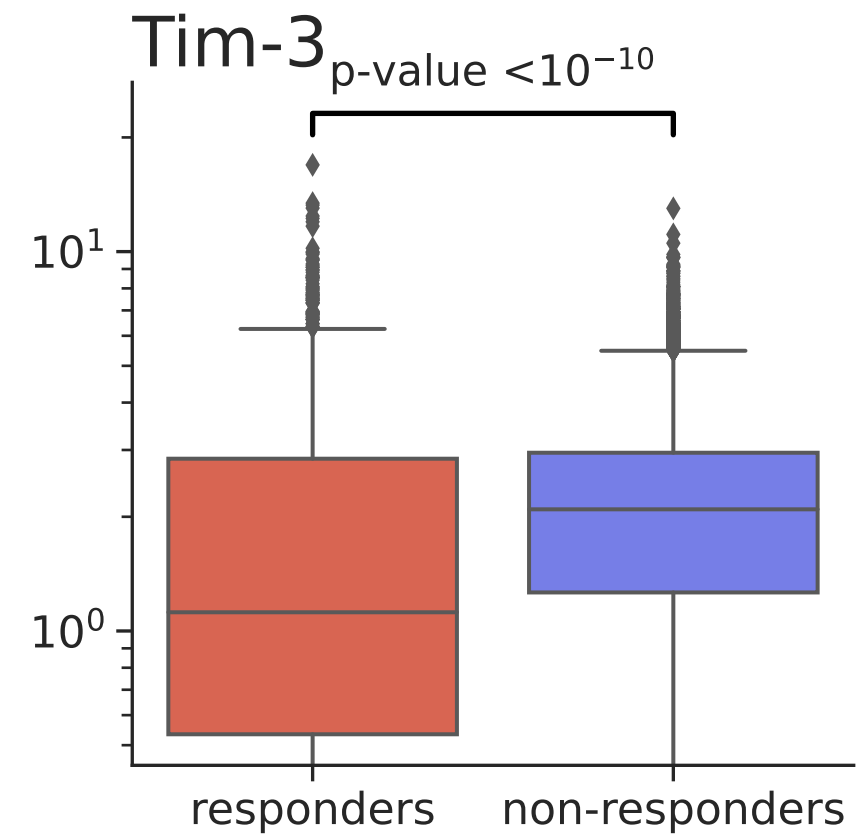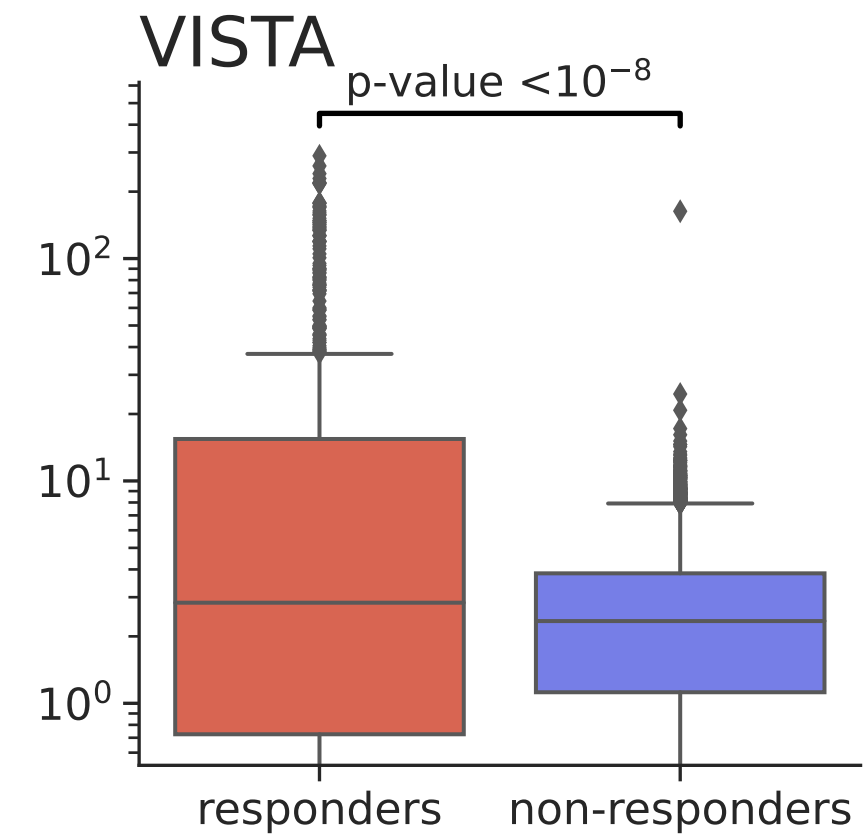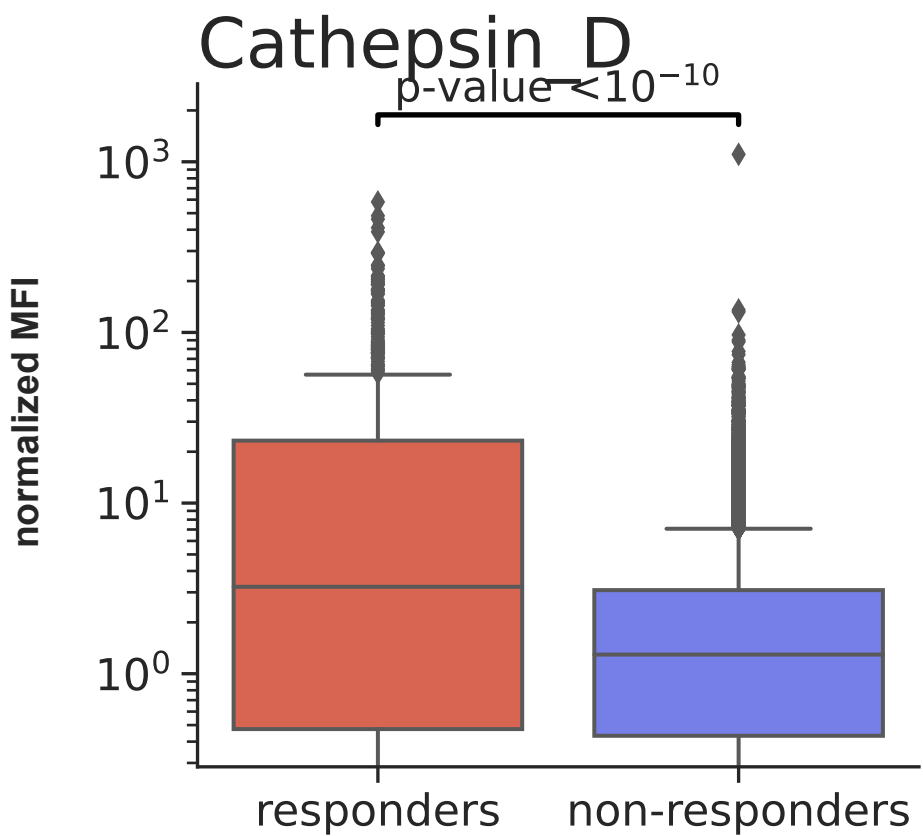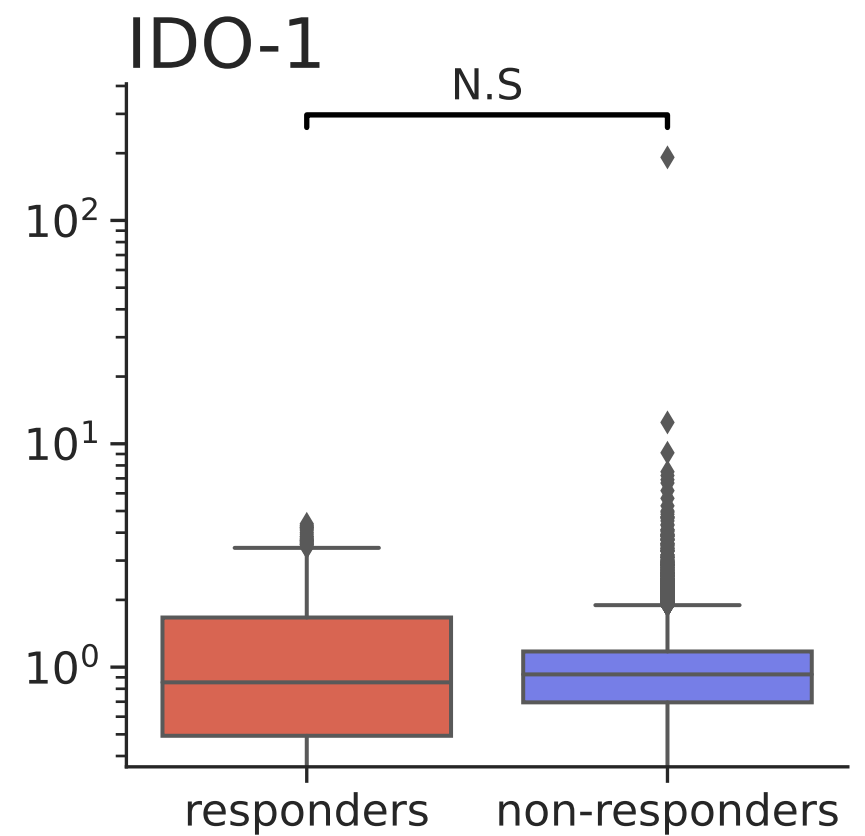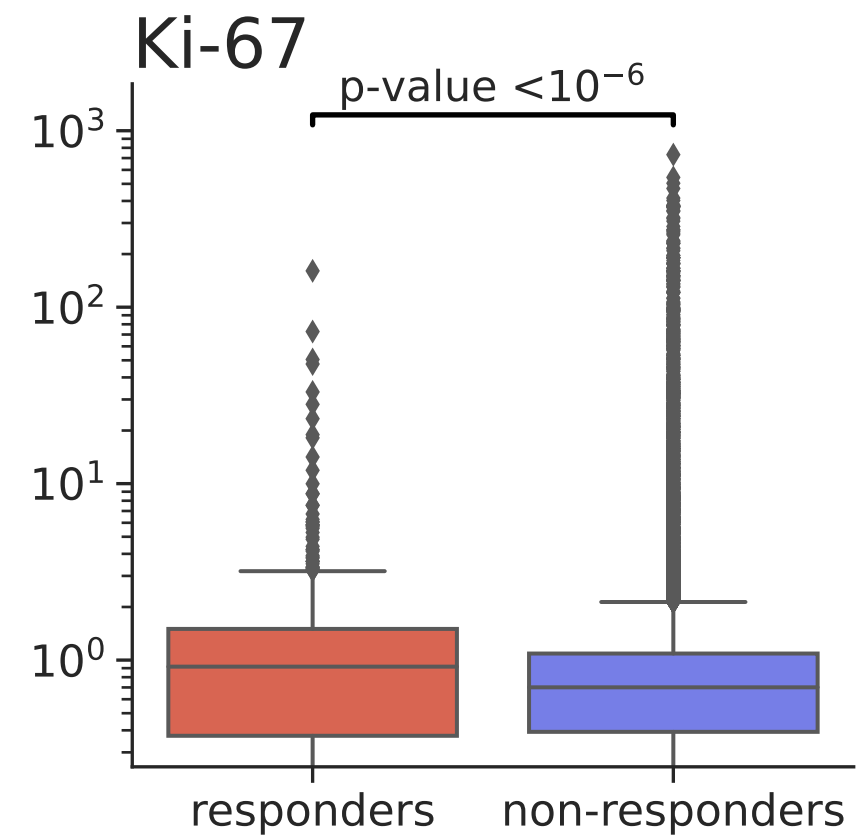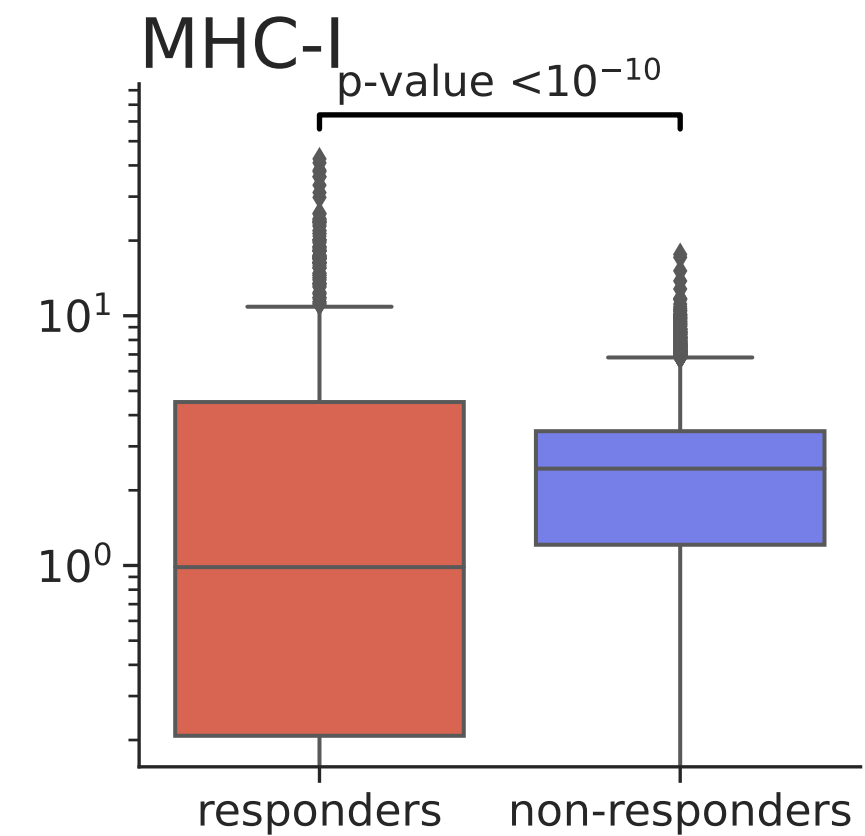

# Periphery, M2 macrophages

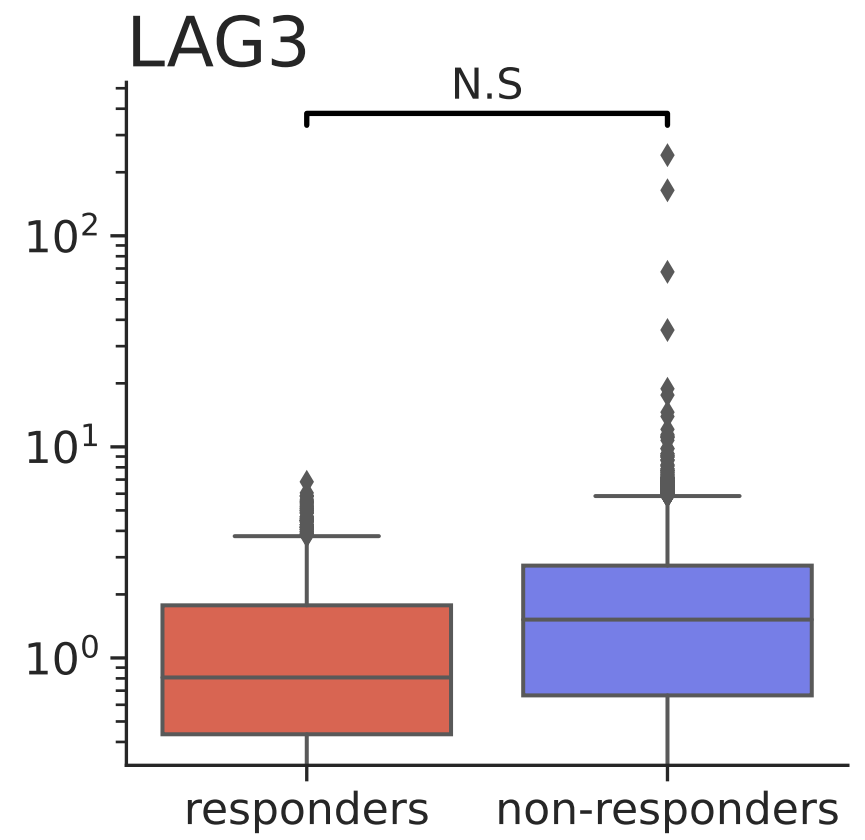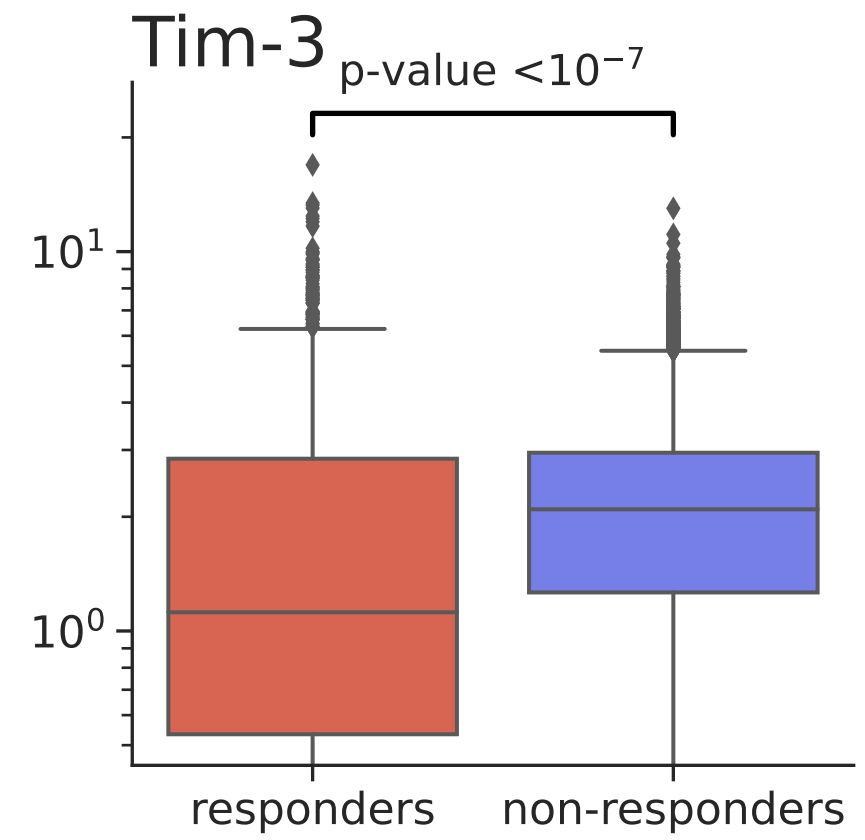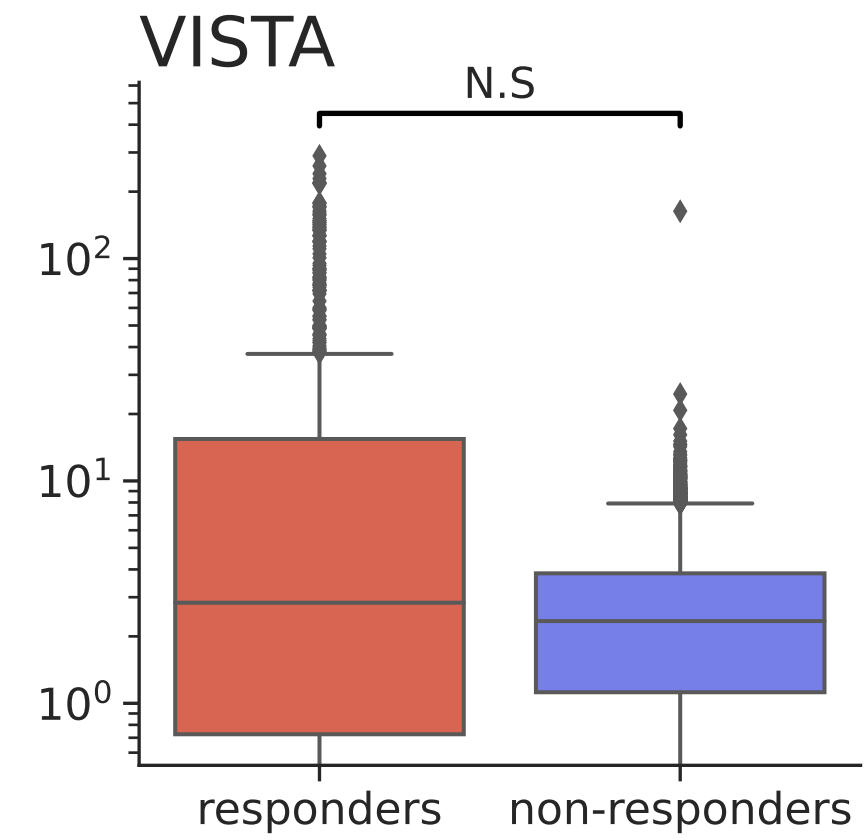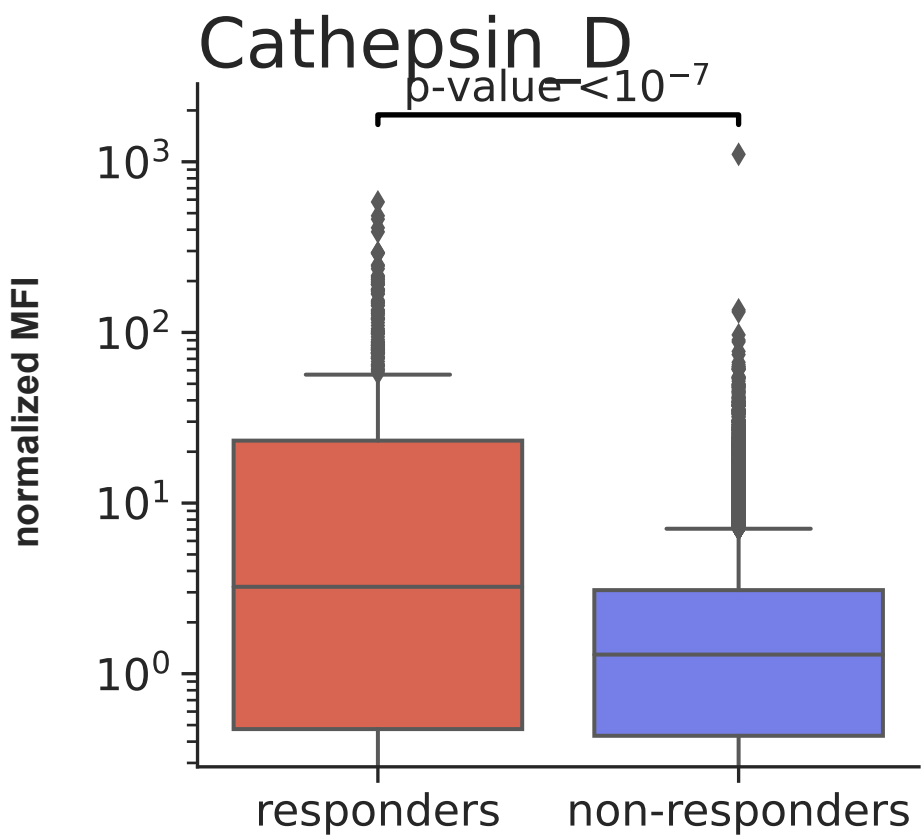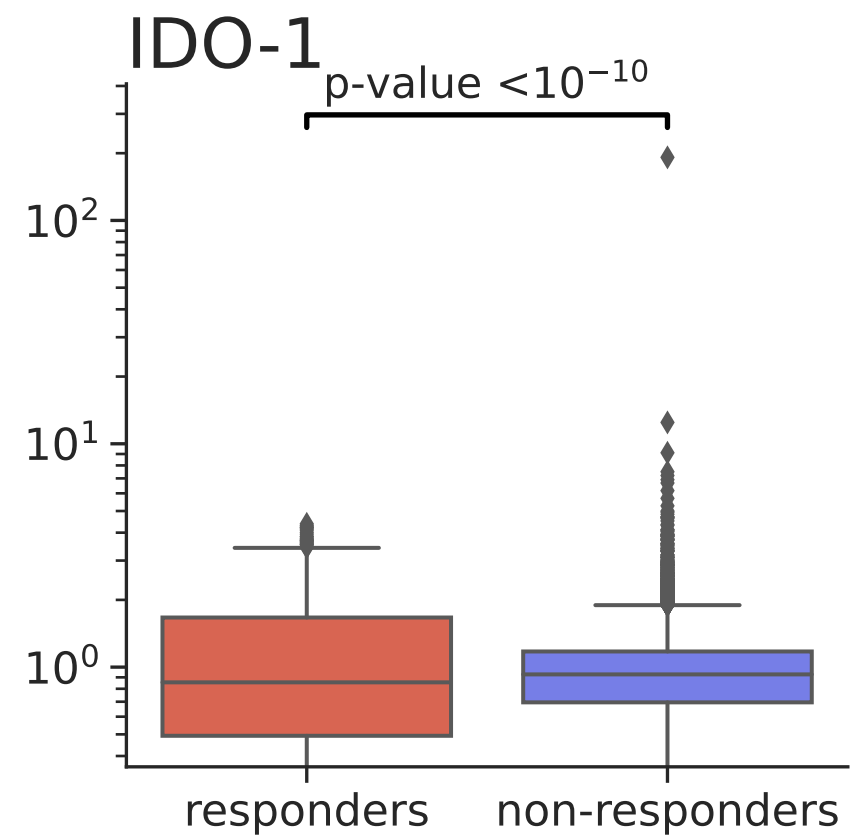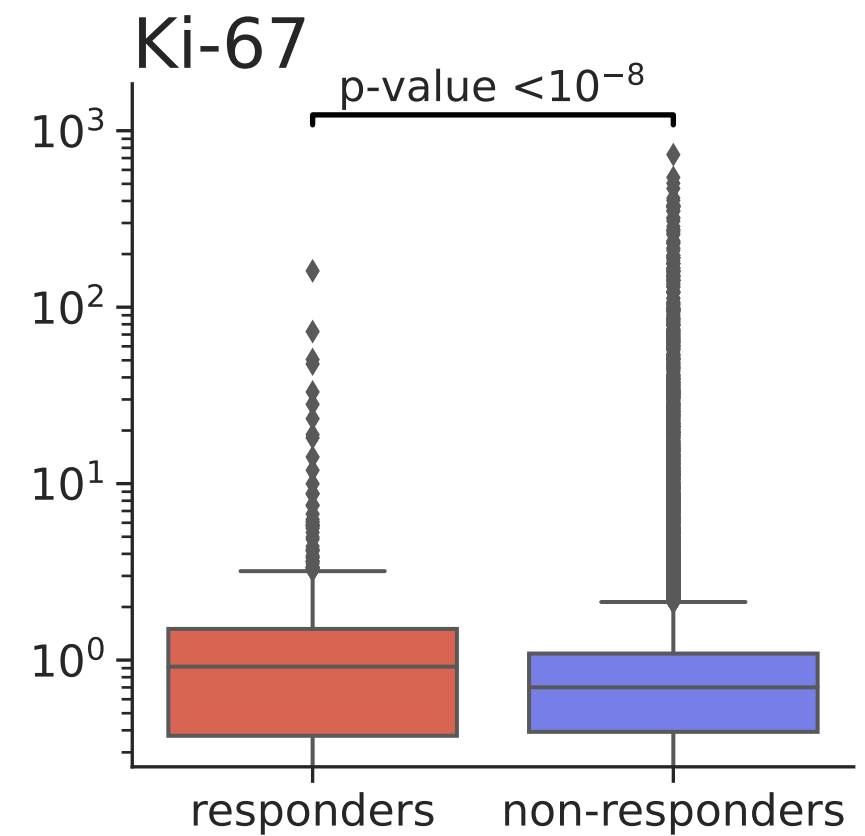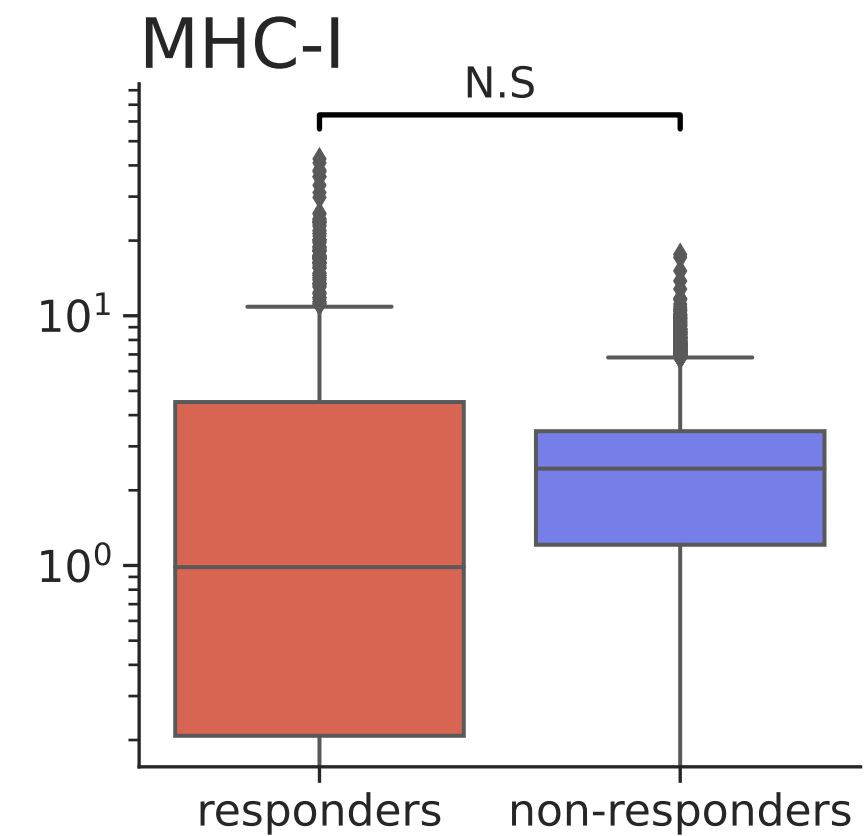

# Center, Microglial cells

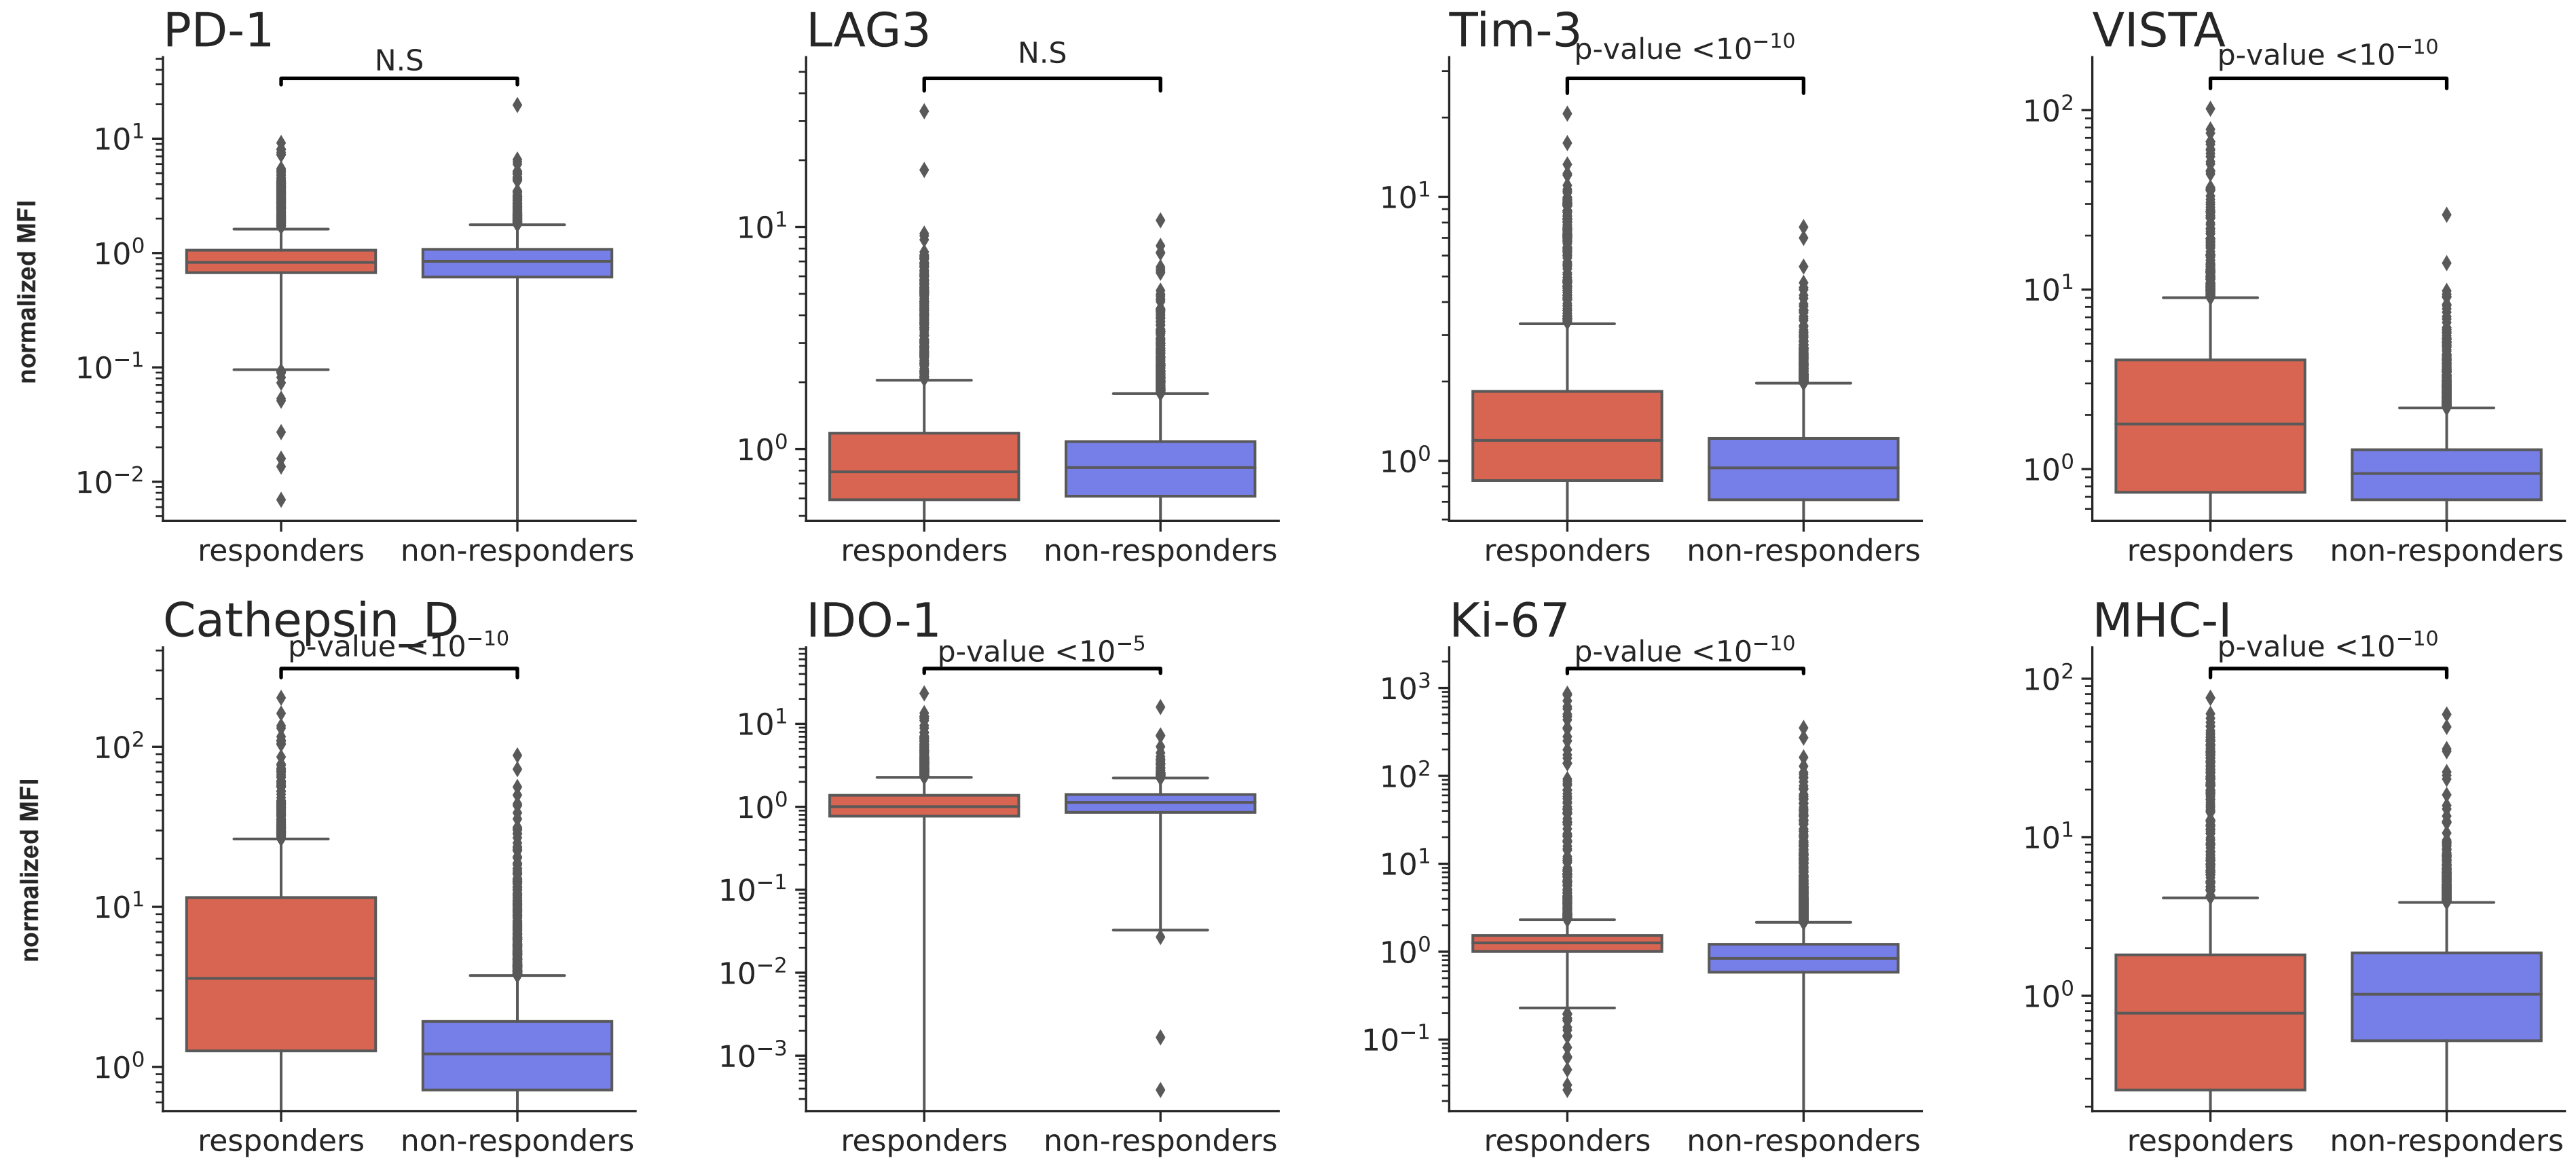

# Periphery, Microglial cells

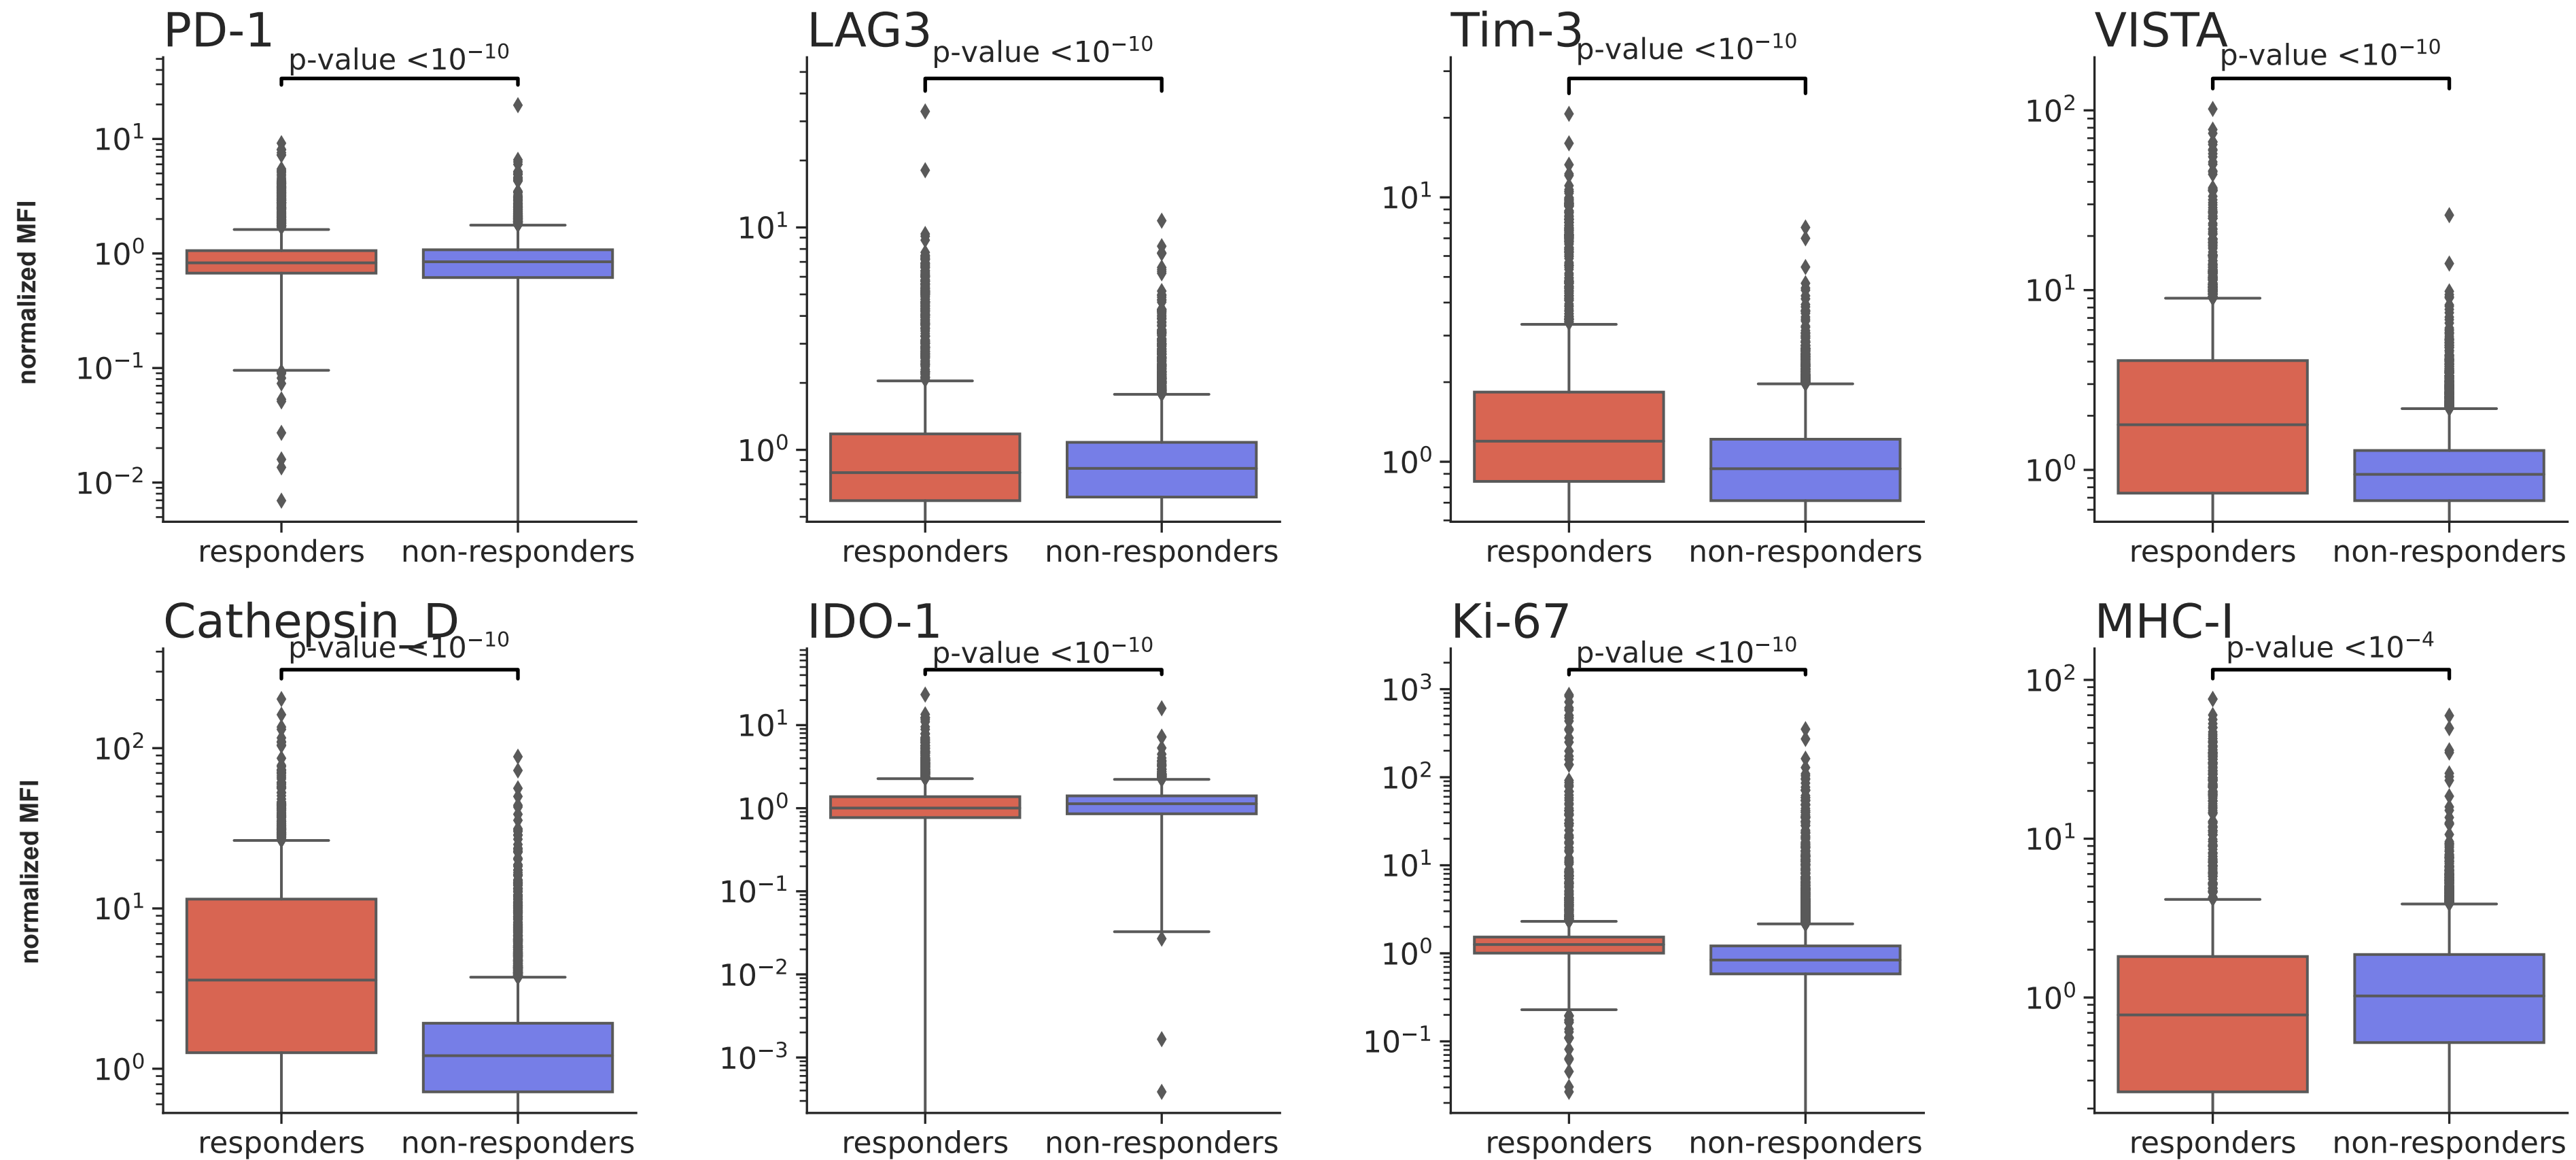

# Center, tumor cells/astrocytes

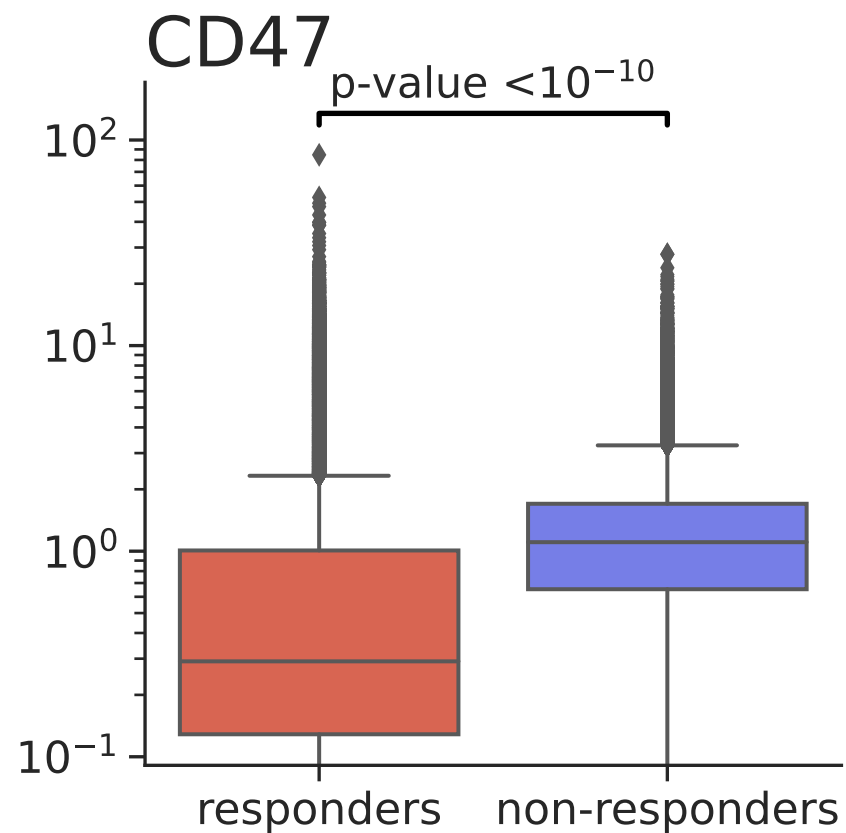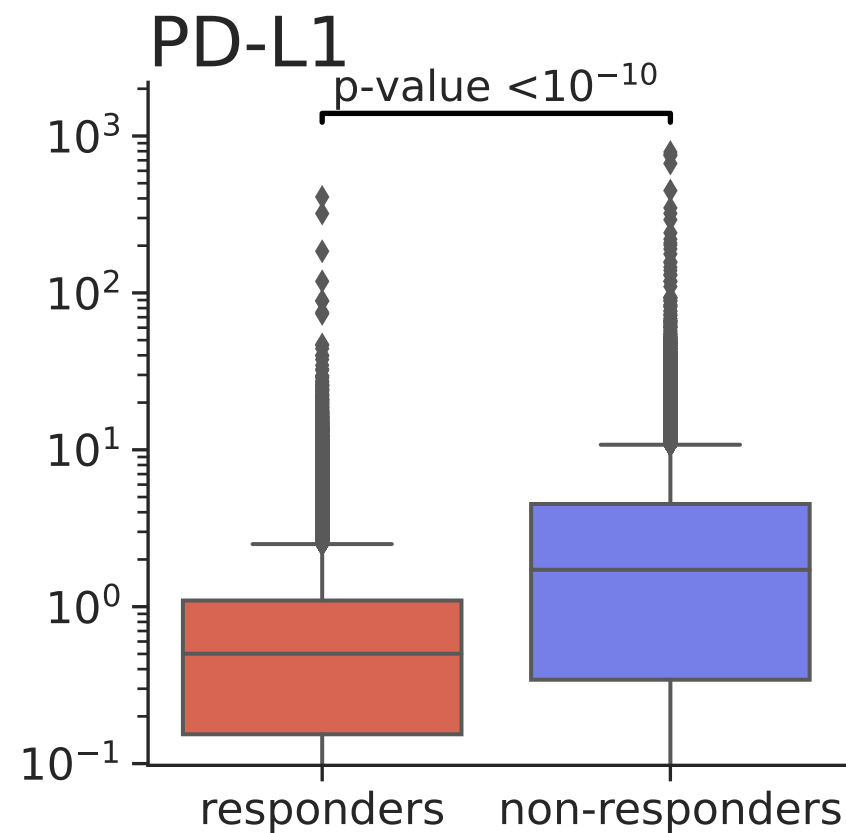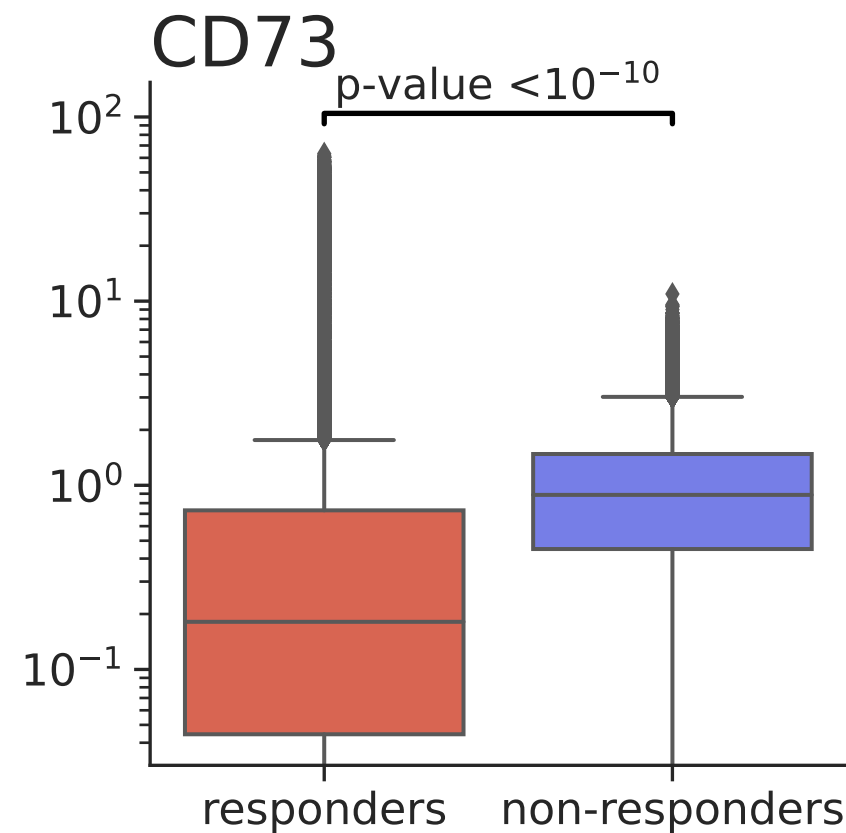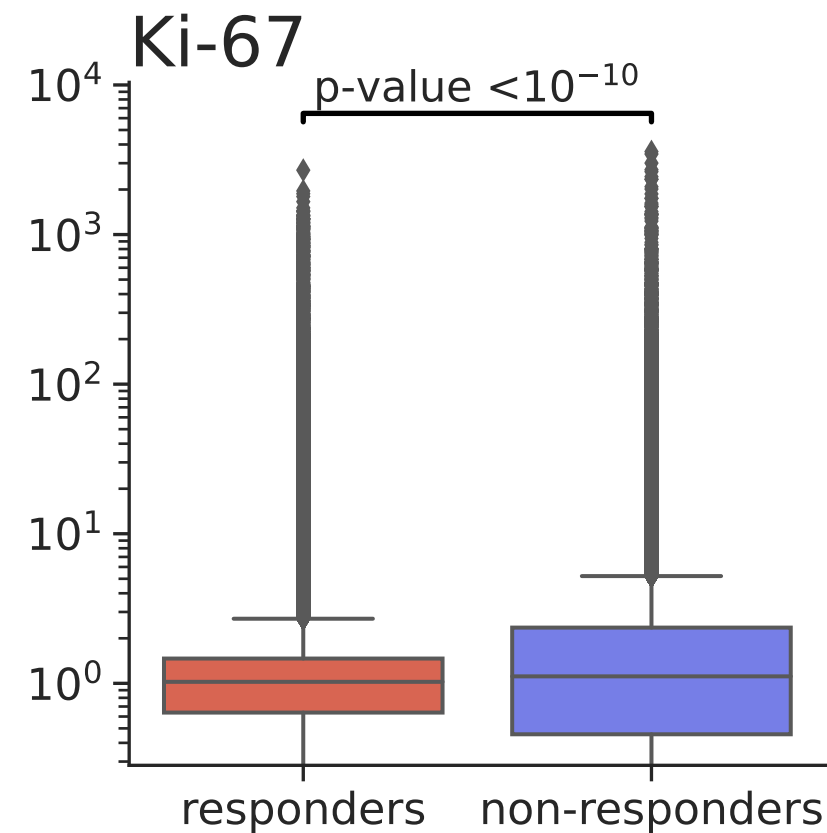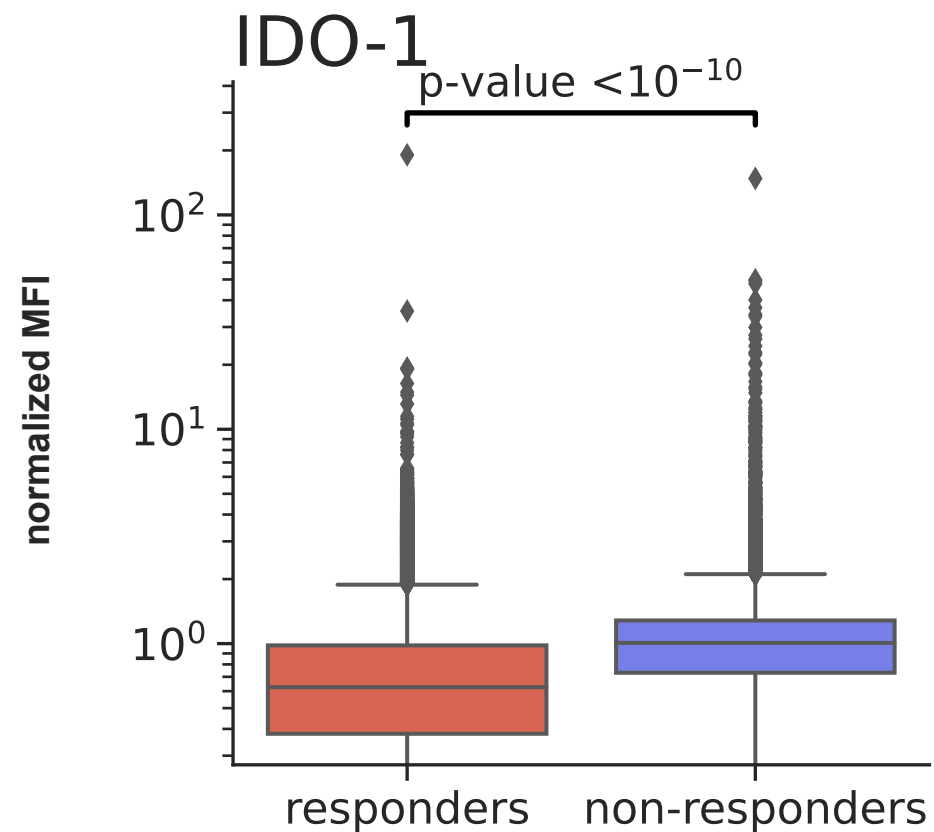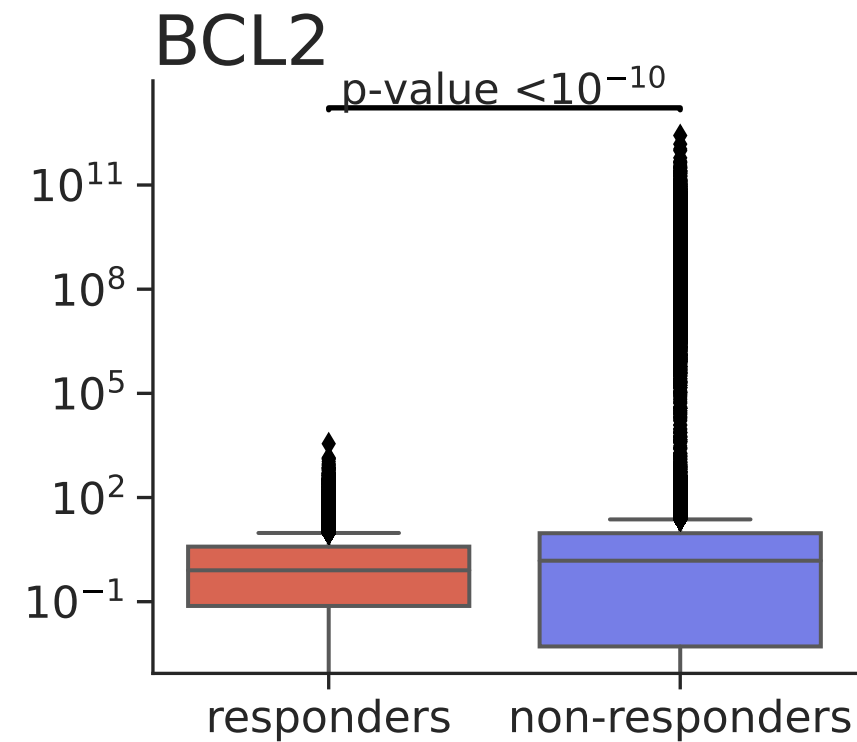



# Periphery, tumor cells/astrocytes

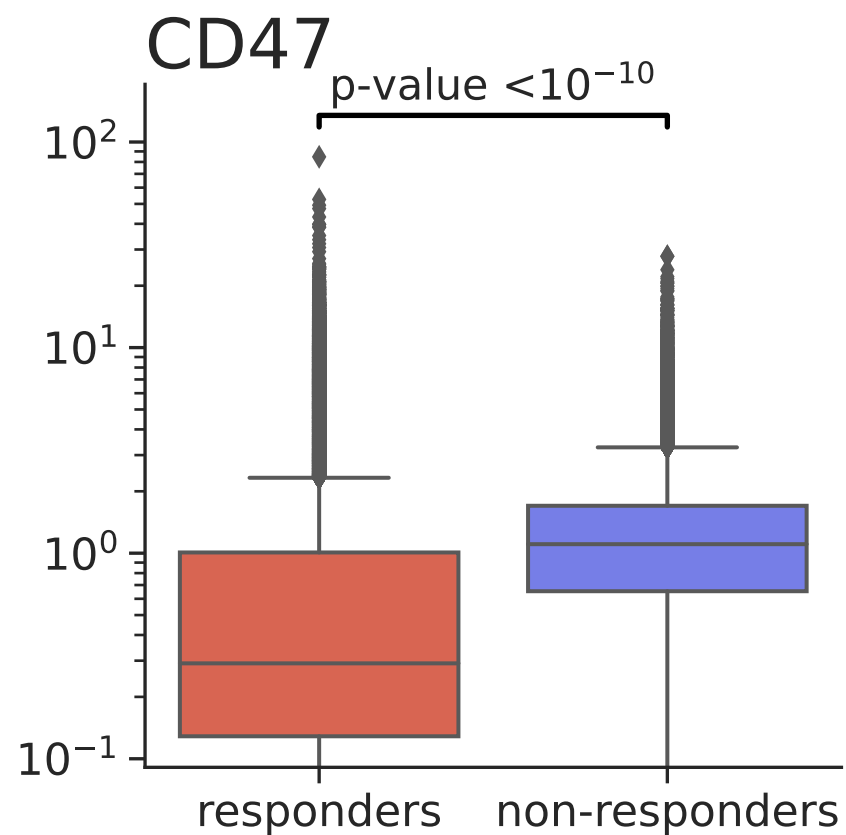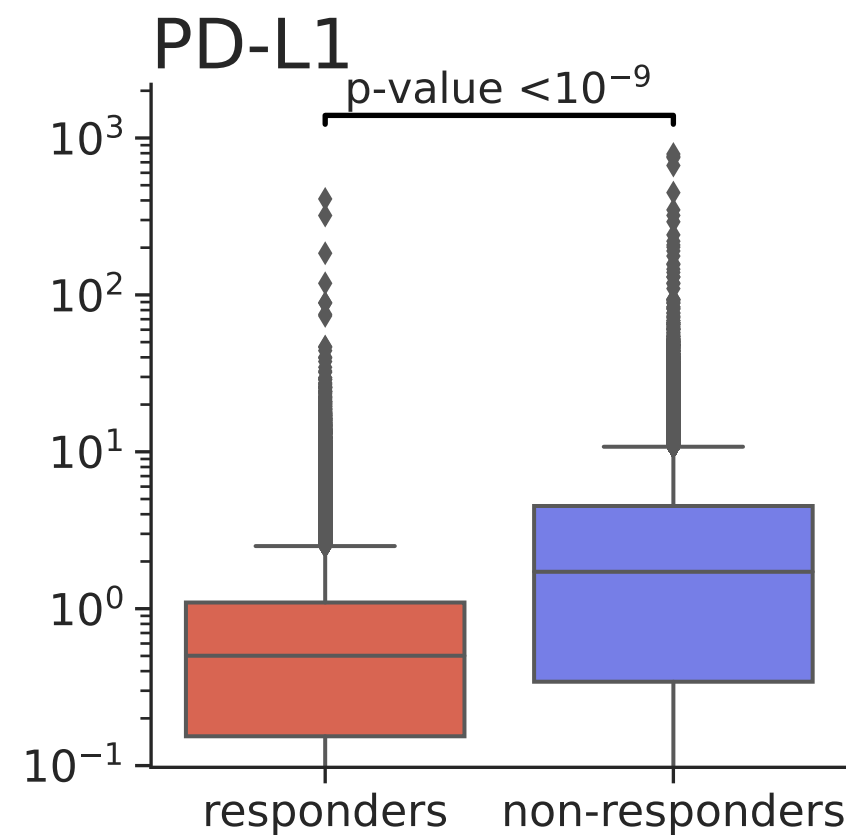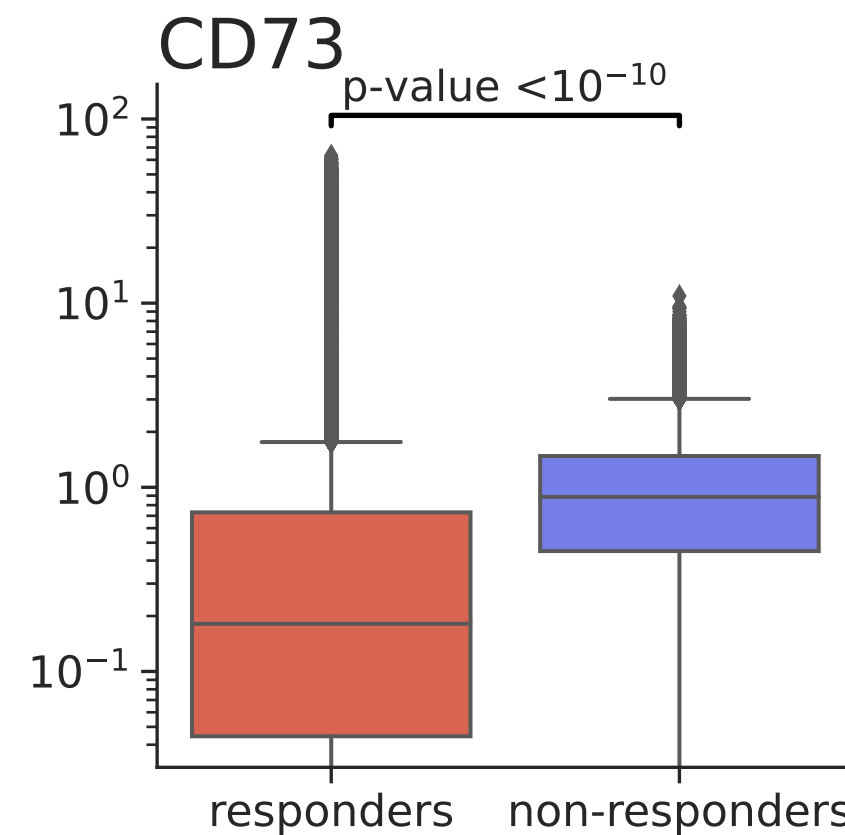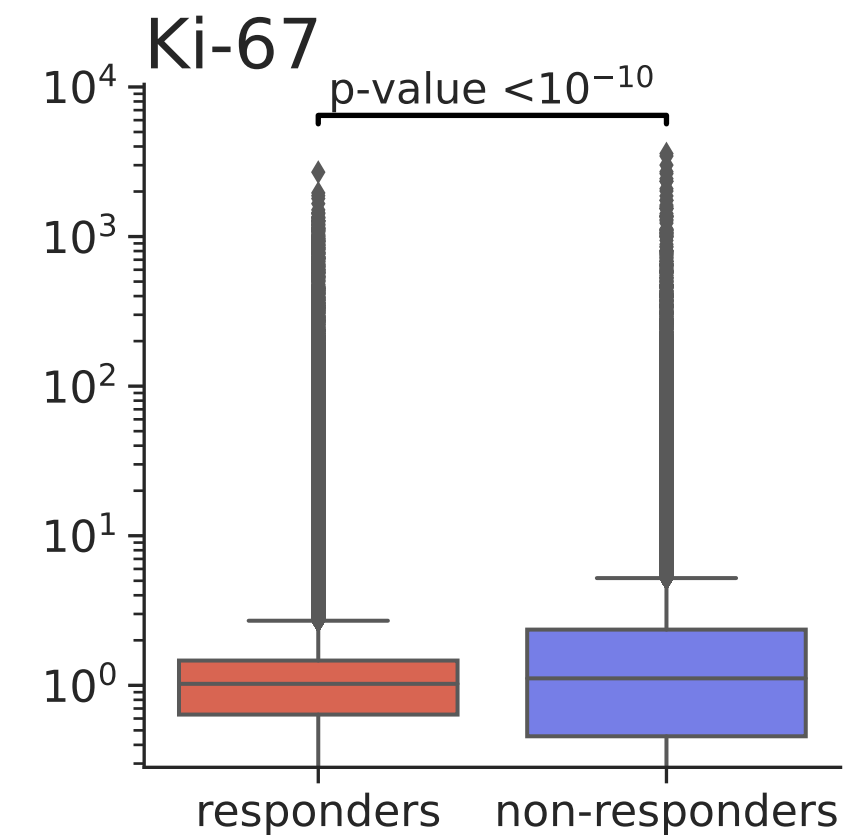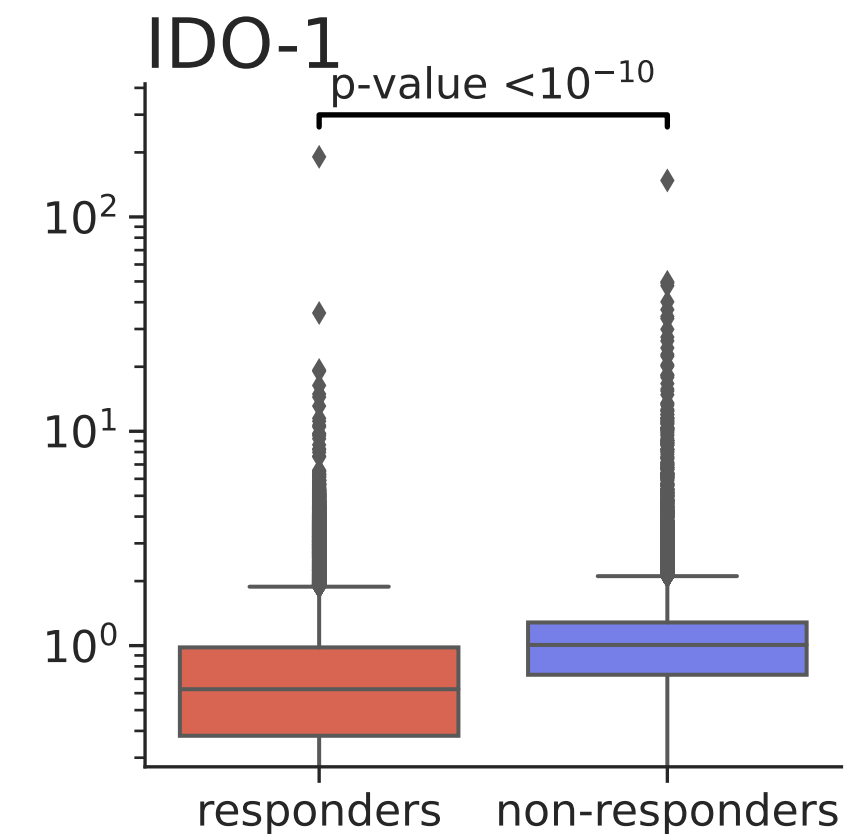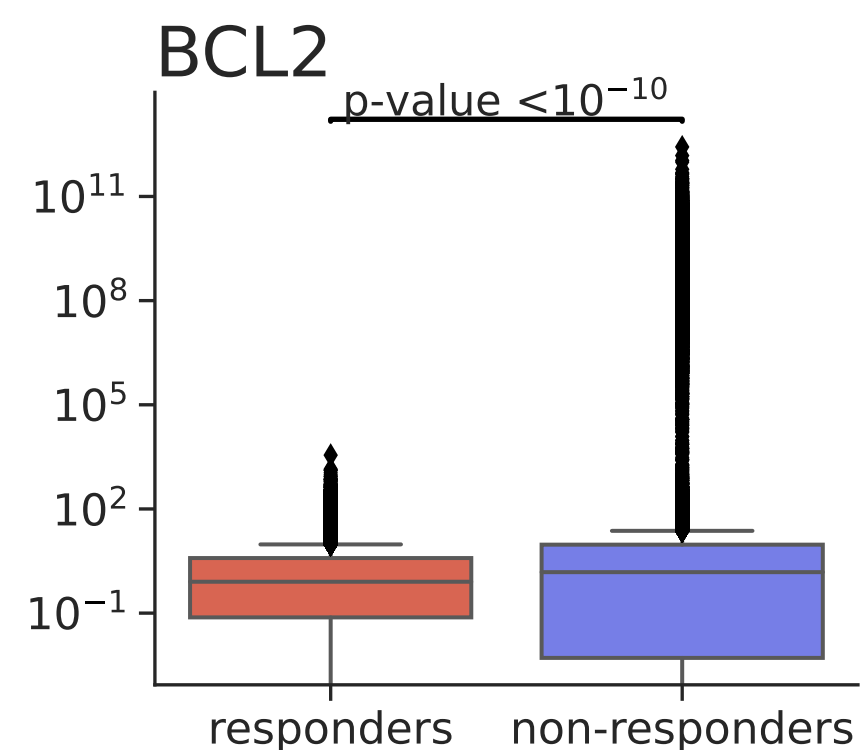

**Fig. S12. Assessment of immune checkpoint, proliferation and activation markers on cellular subsets, stratified per IFN $\gamma$ <sup>high</sup> and IFN $\gamma$ <sup>low</sup> responses, and biopsy location.**

Patient samples were stratified according to IFN $\gamma$  response after immunomodulatory treatment (see Figure 5C and G), and pooled. Log of normalized mean fluorescent intensity (MFI) values of the respective markers in individual cellular phenotypes per region (center vs. periphery) and per IFN $\gamma$  response (low vs. high) were plotted.

Page 1: center CD4 T cells, page 2: periphery CD4 T cells; page 3: center CD8 T cells, page 4: periphery CD8 T cells; page 5: center lymphocytes; page 6: periphery lymphocytes; page 7: center M1 macrophages, page 8: periphery M1 macrophages; page 9: center M2 like microglia, page 10: periphery M2 like microglia; page 11: center M2 macrophages, page 12: periphery M2 macrophages; page 13: center microglia, page 14: periphery microglia; page 15: center tumor cells/astrocytes; page 16: periphery tumor cells/astrocytes.

Statistics: non-parametric Kruskal-Wallis H-test [21], using Benjamini-Hochberg procedure to control the false discovery rate.

| Baseline Parameters            |                                  |                     |                 |           |                |
|--------------------------------|----------------------------------|---------------------|-----------------|-----------|----------------|
| ID                             | Sex                              | Age                 | DG              | WHO       | Survival       |
| 577                            | M                                | 73                  | GBM             | IV        | 500            |
| 579                            | F                                | 58                  | GBM             | IV        | 505            |
| 580                            | M                                | 39                  | GBM             | IV        | 651            |
| 581                            | M                                | 59                  | GBM             | IV        | >700*          |
| 583                            | M                                | 71                  | GBM             | IV        | 227            |
| 587                            | F                                | 69                  | GBM             | IV        | 470            |
| 588                            | F                                | 78                  | GBM             | IV        | 204            |
|                                |                                  |                     |                 |           | * still alive  |
| Genetical characterization     |                                  |                     |                 |           |                |
| ID                             | Subclass                         | IDH                 | MGMT            | TERT      | EGFR           |
| 577                            | MES                              | WT                  | UNM             | WT        | 2n             |
| 579                            | MES                              | WT                  | UNM             | WT        | 2n             |
| 580                            | RTK II CL                        | WT                  | MET             | G228A     | 2n             |
| 581                            | RTK II CL                        | WT                  | MET             | G228A     | >2n            |
| 583                            | RTK II CL                        | WT                  | UNM             | G228A     | 2n             |
| 587                            | MES                              | WT                  | UNM             | WT        | 2n             |
| 588                            | MES                              | WT                  | MET             | G228A     | 2n             |
| Tissue availability            |                                  |                     |                 |           |                |
| ID                             |                                  | Explant (D7) tissue |                 | Cytokines |                |
|                                |                                  | Center              | Periphery       | Center    | Periphery      |
| 577                            |                                  | y                   | y               | y         | y              |
| 579                            |                                  | y                   | y               | y         | y              |
| 580                            |                                  | y                   | y               | y         | y              |
| 581                            |                                  | y                   | NA              | y         | y              |
| 583                            |                                  | y                   | y               | y         | y              |
| 587                            |                                  | y                   | NA              | y         | y              |
| 588                            |                                  | y                   | y               | y         | y              |
| Steroid dosage (Dexamethasone) |                                  |                     |                 |           |                |
| ID                             | Pre-operative                    |                     | Intra-operative |           | Post-operative |
| 577                            | 8mg/day (104mg total)            |                     | none            |           | 28mg           |
| 579                            | 12mg/day (108mg total)           |                     | 8mg             |           | na             |
| 580                            | 12mg/day (60mg total)            |                     | 12mg            |           | 12mg/d         |
| 581                            | 12mg/day (84mg total)            |                     | none            |           | 12mg           |
| 583                            | different doses/day (80mg total) |                     | none            |           | na             |
| 587                            | different doses/day (32mg total) |                     | 12mg            |           | na             |
| 588                            | 24mg/day (24mg total)            |                     | 4mg             |           | 20mg           |

**Table S1. Clinical data and pathological-molecular tumor characteristics.**

Abbreviations: MES mesenchymal; RTK II CL classical; WT wildtype; UNM unmethylated; MET methylated; y yes; NA not available

**Data S1. (separate .xlsx file)**

List of purified antibodies (sheet 1), CODEX multicycle panel (sheet 2) and CODEX oligonucleotides (sheet 3) used in this study.
